# Supplementary material for: Well-defined chiral dinuclear copper-catalyzed tandem asymmetric propargylic amination–carboxylative cyclization sequence toward chiral 2-oxazolidinone derivatives
Source: Royal Society of Chemistry journal article supplement (doi:10.1039/d4qo01368a), 2024-01-01
Supplement: d4qo01368a1.pdf [file d4qo01368a1.pdf]

## Supporting Information

# Well-Defined Chiral Dinuclear Copper-Catalyzed Tandem Asymmetric Propargylic Amination-Carboxylative Cyclization Sequence to Chiral 2-Oxazolidinone Derivatives

Yu Lan,<sup>a,b</sup> Peng Liu,<sup>b</sup> Zekai Fang,<sup>b</sup> Lili Shao,<sup>b</sup> Qilong Cai<sup>\*b</sup> and Xiaoming Wang<sup>\*b,c,d,e</sup>

<sup>a</sup> College of Chemistry and Materials Science, Sichuan Normal University, Chengdu, 610068, China

<sup>b</sup> State Key Laboratory of Organometallic Chemistry and Shanghai Hongkong Joint Laboratory in Chemical Synthesis, Center for Excellence in Molecular Synthesis, Shanghai Institute of Organic Chemistry, University of Chinese Academy of Sciences, Chinese Academy of Sciences, 345 Lingling Road, Shanghai, 200032, China.

<sup>c</sup> School of Chemistry and Materials Science, Hangzhou Institute for Advanced Study, University of Chinese Academy of Sciences, 1 Sub-lane Xiangshan, Hangzhou 310024, China

<sup>d</sup> School of Chemistry and Chemical Engineering, Henan Normal University, Xinxiang, 453007, China.

<sup>e</sup> Ningbo Zhongke Creation Center of New Materials, Ningbo 315899, China.

\*Correspondence author. Email: caiql@sioc.ac.cn, xiaoming@sioc.ac.cn

### Table of Contents

|                                                                             |    |
|-----------------------------------------------------------------------------|----|
| <b>1. General Information and Materials</b> .....                           | 2  |
| <b>2. Experimental Data</b> .....                                           | 3  |
| <b>2.1 Optimization of the reaction conditions</b> .....                    | 3  |
| <b>2.2. General procedure for the preparation of racemic products</b> ..... | 7  |
| <b>2.3 Representative experimental procedure and Substrate scope</b> .....  | 7  |
| <b>2.4 The transformations of products<sup>2-4</sup></b> .....              | 26 |
| <b>3. X-ray Crystallographic Data for the 3ah</b> .....                     | 27 |
| <b>4. References</b> .....                                                  | 29 |
| <b>5. Copies of NMR Spectra</b> .....                                       | 30 |
| <b>6. HPLC Chromatograms</b> .....                                          | 62 |

## 1. General Information and Materials

Unless otherwise noted below, commercially available reagents were used throughout without further purification, and all reactions were performed using standard Schlenk techniques under an atmosphere of argon or in glovebox. Dry solvents were purchased and stored with molecular sieves in an atmosphere of argon. Flash column chromatography was performed using 200-300 mesh silica gel. Melting points were measured on a RY-I apparatus and uncorrected.  $^1\text{H}$ ,  $^{13}\text{C}$  and  $^{19}\text{F}$  NMR spectra were recorded on Varian (400 MHz) or Agilent (400 MHz or 600 MHz) spectrometers. Chemical shifts were reported in parts per million (ppm) and refer to the appropriate residual solvent peak:  $^1\text{H}$  NMR were referenced to the central peak of  $\text{CDCl}_3$  (7.260 ppm); or to the internal standard TMS (0.000 ppm);  $^{13}\text{C}$  NMR were referenced to the central peak of 77.00 ppm for  $\text{CDCl}_3$ . Optical rotations were determined using a Perkin Elmer 341 MC polarimeter. HRMS(EI) was determined on a Waters Micromass GCT Premier instrument. HRMS(ESI) was determined on Bruker APEXIII 7.0 TESLA FTMS or Agilent Technologies 6224 TOF LC/MS. Single crystal X-ray diffraction data was collected on Bruker D<sub>8</sub> Venture diffractometer at 293(2) K or 173(0) K. Using Olex<sub>2</sub>, the structure was solved with the SHELXT structure solution program using Intrinsic Phasing and refined with the SHELXL refinement package using Least Squares minimisation. HPLC analyses were performed on a JASCO 2089 liquid chromatograph.

## 2. Experimental Data

### 2.1 Optimization of the reaction conditions

Table S1. Effects of the [Ag] salts<sup>a</sup>

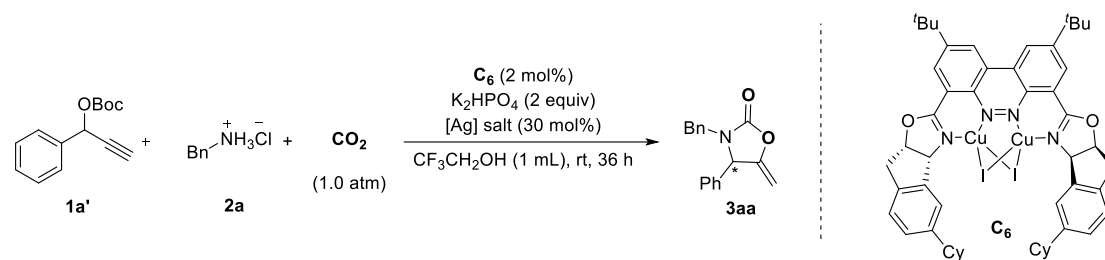

| Entry | Cat.                  | [Ag] salts                      | Yield [%] <sup>b</sup> | ee [%] <sup>c</sup> |
|-------|-----------------------|---------------------------------|------------------------|---------------------|
| 1     | <b>C</b> <sub>6</sub> | AgBr                            | 64                     | 83                  |
| 2     | <b>C</b> <sub>6</sub> | AgI                             | 39                     | 89                  |
| 3     | <b>C</b> <sub>6</sub> | AgF                             | 69                     | 85                  |
| 4     | <b>C</b> <sub>6</sub> | AgPF <sub>6</sub>               | 42                     | 89                  |
| 5     | <b>C</b> <sub>6</sub> | AgClO <sub>4</sub>              | 52                     | 85                  |
| 6     | <b>C</b> <sub>6</sub> | AgOTf                           | 64                     | 85                  |
| 7     | <b>C</b> <sub>6</sub> | AgOTs                           | 72                     | 85                  |
| 8     | <b>C</b> <sub>6</sub> | Ag <sub>2</sub> CO <sub>3</sub> | 86                     | 85                  |
| 9     | <b>C</b> <sub>6</sub> | AgNO <sub>2</sub>               | 38                     | 71                  |
| 10    | <b>C</b> <sub>6</sub> | Ag <sub>2</sub> O               | 72                     | 85                  |
| 11    | <b>C</b> <sub>6</sub> | AgSCF <sub>3</sub>              | trace                  | -                   |
| 12    | <b>C</b> <sub>6</sub> | Ag <sub>3</sub> PO <sub>4</sub> | 76                     | 85                  |

<sup>a</sup>Unless otherwise noted, reaction conditions are as follows: **1a'** (0.1 mmol), **2a** (0.15 mmol), K<sub>2</sub>HPO<sub>4</sub> (2.0 equiv), [Ag] salts (30 mol%) and **C**<sub>6</sub> (2 mol %) in CF<sub>3</sub>CH<sub>2</sub>OH (1.0 mL) at room temperature for 36 h. <sup>b</sup><sup>1</sup>H NMR yield using Mesitylene as the internal standard. <sup>c</sup>The ee value of **3aa** was determined by HPLC on a chiral column IA.

**Table S2.** Effects of leaving groups in propargylic<sup>a</sup>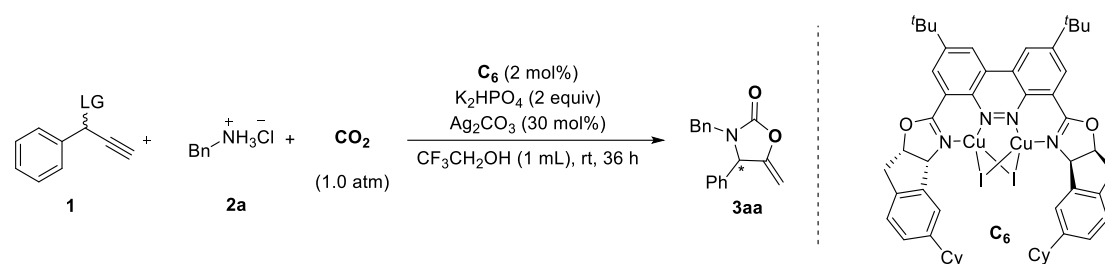

| Entry | Cat.                 | LG                               | Yield [%] <sup>b</sup> | ee [%] <sup>c</sup> |
|-------|----------------------|----------------------------------|------------------------|---------------------|
| 1     | <b>C<sub>6</sub></b> | OBoc                             | 86                     | 85                  |
| 2     | <b>C<sub>6</sub></b> | OCOC <sub>6</sub> F <sub>5</sub> | 65                     | 91                  |
| 3     | <b>C<sub>6</sub></b> | OAc                              | 64                     | 89                  |

<sup>a</sup>Unless otherwise noted, reaction conditions are as follows: **1** (0.1 mmol), **2a** (0.15 mmol), K<sub>2</sub>HPO<sub>4</sub> (2.0 equiv), Ag<sub>2</sub>CO<sub>3</sub> (30 mol%) and **C<sub>6</sub>** (2 mol %) in CF<sub>3</sub>CH<sub>2</sub>OH (1.0 mL) at room temperature for 36 h. <sup>b</sup><sup>1</sup>H NMR yield using mesitylene as the internal standard. <sup>c</sup>The ee value of **3aa** was determined by HPLC on a chiral column IA.

**Table S3.** Effects of the Base<sup>a</sup>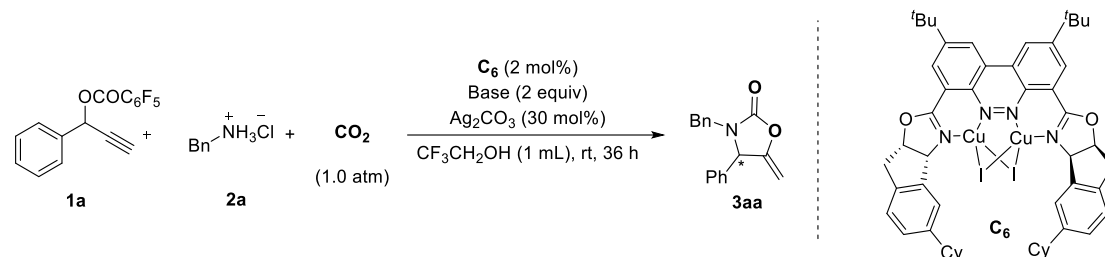

| Entry | Cat.                 | Base                           | Yield [%] <sup>b</sup> | ee [%] <sup>c</sup> |
|-------|----------------------|--------------------------------|------------------------|---------------------|
| 1     | <b>C<sub>6</sub></b> | CH <sub>3</sub> COOK           | trace                  | -                   |
| 2     | <b>C<sub>6</sub></b> | <sup>t</sup> BuOLi             | trace                  | -                   |
| 3     | <b>C<sub>6</sub></b> | K <sub>2</sub> CO <sub>3</sub> | 76                     | 87                  |
| 4     | <b>C<sub>6</sub></b> | <sup>t</sup> BuOK              | 65                     | 91                  |
| 5     | <b>C<sub>6</sub></b> | <sup>t</sup> BuONa             | 70                     | 91                  |

6

C<sub>6</sub>CH<sub>3</sub>COOLi

trace

-

<sup>a</sup>Unless otherwise noted, reaction conditions are as follows: **1a** (0.1 mmol), **2a** (0.15 mmol), Base (2.0 equiv), Ag<sub>2</sub>CO<sub>3</sub> (30 mol%) and C<sub>6</sub> (2 mol %) in CF<sub>3</sub>CH<sub>2</sub>OH (1.0 mL) at room temperature for 36 h. <sup>b</sup><sup>1</sup>H NMR yield using mesitylene as the internal standard.

<sup>c</sup>The *ee* value of **3aa** was determined by HPLC on a chiral column IA.

**Table S4.** Investigation of dinuclear copper-catalyzed asymmetric propargylic amination-carboxylative cyclization sequence<sup>a</sup>

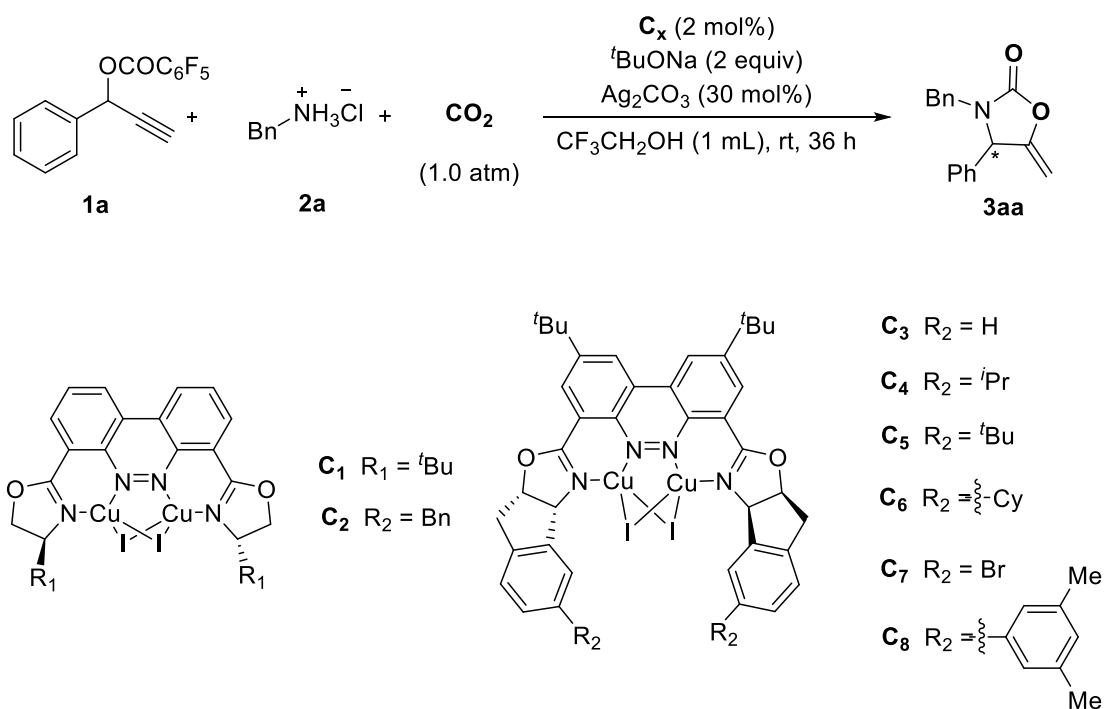

| Entry | Cat.           | Yield [%] <sup>b</sup>     | <i>ee</i> [%] <sup>c</sup> |
|-------|----------------|----------------------------|----------------------------|
| 1     | C <sub>1</sub> | 51                         | 73                         |
| 2     | C <sub>2</sub> | 54                         | 70                         |
| 3     | C <sub>3</sub> | 49                         | 79                         |
| 4     | C <sub>4</sub> | 64                         | 85                         |
| 5     | C <sub>5</sub> | 59                         | 87                         |
| 6     | C <sub>6</sub> | <b>70 (64)<sup>d</sup></b> | <b>91</b>                  |

|                |                      |    |    |
|----------------|----------------------|----|----|
| 7              | <b>C<sub>7</sub></b> | 54 | 65 |
| 8              | <b>C<sub>8</sub></b> | 47 | 70 |
| 9 <sup>e</sup> | <b>C<sub>6</sub></b> | 74 | 88 |

---

<sup>a</sup>Unless otherwise noted, reaction conditions are as follows: **1a** (0.1 mmol), **2a** (0.15 mmol), <sup>t</sup>BuONa (2.0 equiv), Ag<sub>2</sub>CO<sub>3</sub> (30 mol%) and **C<sub>x</sub>** (2 mol %) in CF<sub>3</sub>CH<sub>2</sub>OH (1.0 mL) at room temperature for 36 h. <sup>b</sup><sup>1</sup>H NMR yield using mesitylene as the internal standard. <sup>c</sup>The *ee* value of **3aa** was determined by HPLC on a chiral column IA. <sup>d</sup>Isolated yield. <sup>e</sup>**2a** was replaced by BnNH<sub>2</sub>.

## 2.2. General procedure for the preparation of racemic products

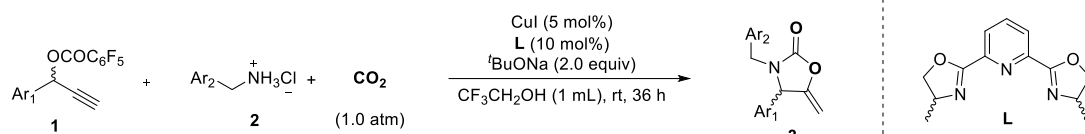

A typical experimental procedure for the preparation of (*rac*)-3-benzyl-5-methylene-4-phenyloxazolidin-2-one (*rac*-**3aa**) is described below. **1a** (32.6 mg, 0.1 mmol, 1.0 equiv), **2a** (21.46 mg, 0.15 mmol, 1.5 equiv),  $t\text{BuONa}$  (19.22 mg, 0.2 mmol, 2.0 equiv),  $\text{CuI}$  (0.95 mg, 0.005 mmol, 5 mol%) and **L** (2.45 mg, 0.01 mmol, 10 mol%) was added in a 10 mL Schlenk flask and a dry  $\text{CO}_2$  atmosphere was established by a balloon filled with  $\text{CO}_2$ . Then,  $\text{CF}_3\text{CH}_2\text{OH}$  (1.0 mL) was added. After stirring at room temperature for 36 h, the mixture was concentrated under reduced pressure. The residue was purified by silica gel chromatography with n-hexane and EtOAc (n-hexane/EtOAc = 10/1-5/1) as eluent to give *rac*-**3aa** as a yellow solid.

## 2.3 Representative experimental procedure and Substrate scope

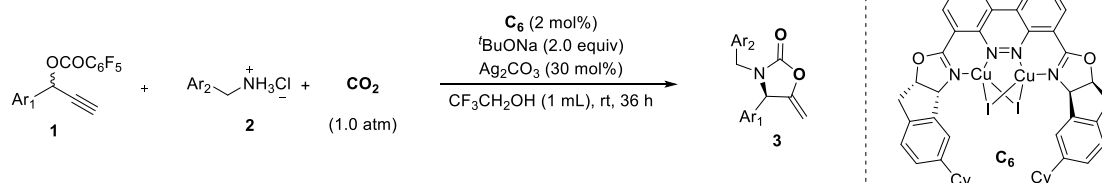

A typical experimental procedure for the preparation of (*R*)-3-benzyl-5-methylene-4-phenyloxazolidin-2-one (**3aa**) is described below. **1a** (32.6 mg, 0.1 mmol, 1.0 equiv), **2a** (21.46 mg, 0.15 mmol, 1.5 equiv),  $t\text{BuONa}$  (19.22 mg, 0.2 mmol, 2.0 equiv),  $\text{Ag}_2\text{CO}_3$  (8.27 mg, 0.03 mmol, 30 mol%) and **C6** (2.30 mg, 0.002 mmol, 2 mol%) was added in a 10 mL Schlenk flask and a dry  $\text{CO}_2$  atmosphere was established by a balloon filled with  $\text{CO}_2$ . Then,  $\text{CF}_3\text{CH}_2\text{OH}$  (1.0 mL) was added. After stirring at room temperature for 36 h, the mixture was concentrated under reduced pressure. The residue was purified by silica gel chromatography with n-hexane and EtOAc (n-hexane/EtOAc = 10/1-5/1) as eluent to give **3aa** as a yellow solid.

Spectroscopic data are as follows.

Preparations of chiral dinuclear copper complexes are in accordance with the literature<sup>1</sup>.

**(R)-3-benzyl-5-methylene-4-phenyloxazolidin-2-one (3aa)**

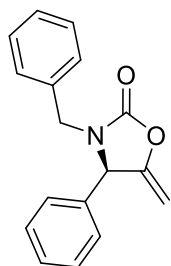

Yellow solid, 17.0 mg, 64% yield, 91% *ee*. M. P. 77-79 °C.  $[\alpha]_{\text{D}}^{20} = -21.50$  (c 0.2, CHCl<sub>3</sub>). <sup>1</sup>H NMR (400 MHz, CDCl<sub>3</sub>)  $\delta$  7.45 – 7.39 (m, 3H), 7.36 – 7.28 (m, 3H), 7.24 – 7.19 (m, 2H), 7.18 – 7.12 (m, 2H), 5.02 (t, *J* = 2.4 Hz, 1H), 4.90 (d, *J* = 14.9 Hz, 1H), 4.75 (t, *J* = 3.0 Hz, 1H), 4.02 (t, *J* = 2.2 Hz, 1H), 3.64 (d, *J* = 14.9 Hz, 1H) ppm. <sup>13</sup>C NMR (101 MHz, CDCl<sub>3</sub>)  $\delta$  155.23, 154.78, 136.80, 134.90, 129.38, 129.34, 128.95, 128.65, 128.26, 127.90, 88.43, 61.94, 45.57 ppm. IR (neat)  $\nu$  3061, 3028, 2959, 2925, 2126, 1953 cm<sup>-1</sup>; HRMS (ESI) *m/z*: calcd. for C<sub>17</sub>H<sub>15</sub>NO<sub>2</sub>Na<sup>+</sup> [M+Na]<sup>+</sup>: 288.0995, Found: 288.0994. The enantiomeric excess was determined by HPLC on Chiralcel IA column, *n*-hexane : isopropanol = 95 : 5, flow rate = 1.0 mL/min, UV detection at  $\lambda = 214$  nm, *t*<sub>R</sub> = 9.3 min (minor), *t*<sub>R</sub> = 9.9 min (major).

**(R)-3-benzyl-4-(4-(tert-butyl)phenyl)-5-methyleneoxazolidin-2-one (3ba)**

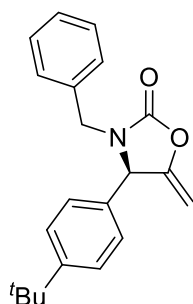

White solid, 13.7 mg, 42% yield, 91% *ee*. M. P. 83-85 °C.  $[\alpha]_{\text{D}}^{20} = -27.60$  (c 0.2, CHCl<sub>3</sub>). <sup>1</sup>H NMR (400 MHz, CDCl<sub>3</sub>)  $\delta$  7.41 (d, *J* = 7.9 Hz, 2H), 7.37 – 7.28 (m, 3H), 7.15 (t, *J* = 8.7 Hz, 4H), 5.00 (s, 1H), 4.86 (d, *J* = 15.0 Hz, 1H), 4.75 (s, 1H), 4.03 (s, 1H), 3.66



(d,  $J = 14.9$  Hz, 1H), 1.34 (s, 9H) ppm.  $^{13}\text{C}$  NMR (101 MHz,  $\text{CDCl}_3$ )  $\delta$  155.32, 154.97, 152.51, 135.15, 133.71, 128.95, 128.73, 128.23, 127.66, 126.26, 88.35, 61.73, 45.54, 34.85, 31.42 ppm. IR (neat)  $\nu$  3062, 3032, 2960, 2929, 2866, 2117, 1950, 1782  $\text{cm}^{-1}$ ; HRMS (ESI)  $m/z$ : calcd. for  $\text{C}_{21}\text{H}_{23}\text{NO}_2\text{Na}^+$   $[\text{M}+\text{Na}]^+$ : 344.1621, Found: 344.1613. The enantiomeric excess was determined by HPLC on Chiralcel IA column, n-hexane : isopropanol = 95 : 5, flow rate = 1.0 mL/min, UV detection at  $\lambda = 214$  nm,  $t_{\text{R}} = 6.9$  min (minor),  $t_{\text{R}} = 7.6$  min (major).

**(*R*)-3-benzyl-4-(4-fluorophenyl)-5-methyleneoxazolidin-2-one (3ca)**

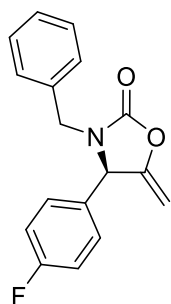

Yellow solid, 17.43 mg, 61% yield, 91% *ee*. M. P. 79-81 °C.  $[\alpha]_{\text{D}}^{20} = -11.70$  (c 0.2,  $\text{CHCl}_3$ ).  $^1\text{H}$  NMR (400 MHz,  $\text{CDCl}_3$ )  $\delta$  7.37 – 7.28 (m, 3H), 7.24 – 7.16 (m, 2H), 7.16 – 7.05 (m, 4H), 5.01 (s, 1H), 4.88 (d,  $J = 15.0$  Hz, 1H), 4.78 (s, 1H), 4.01 (s, 1H), 3.63 (d,  $J = 15.0$  Hz, 1H) ppm.  $^{13}\text{C}$  NMR (101 MHz,  $\text{CDCl}_3$ )  $\delta$  163.28 (d,  $J = 250.0$  Hz), 155.13, 154.67, 134.77, 132.68 (d,  $J = 3.4$  Hz), 129.86 (d,  $J = 8.5$  Hz), 129.05, 128.67, 128.40, 116.43 (d,  $J = 22.0$  Hz), 88.74, 61.32, 45.69 ppm.  $^{19}\text{F}$  NMR (376 MHz,  $\text{CDCl}_3$ )  $\delta$  -111.83 ppm. IR (neat)  $\nu$  3300, 3065, 3030, 2962, 2926, 2854, 2445, 2351, 1950, 1884  $\text{cm}^{-1}$ ; HRMS (ESI)  $m/z$ : calcd. for  $\text{C}_{17}\text{H}_{14}\text{NO}_2\text{FNa}^+$   $[\text{M}+\text{Na}]^+$ : 306.0901, Found: 306.0894. The enantiomeric excess was determined by HPLC on Chiralcel IA column, n-hexane : isopropanol = 95 : 5, flow rate = 1.0 mL/min, UV detection at  $\lambda = 214$  nm,  $t_{\text{R}} = 9.8$  min (minor),  $t_{\text{R}} = 10.7$  min (major).

**(*R*)-3-benzyl-4-(4-chlorophenyl)-5-methyleneoxazolidin-2-one (3da)**

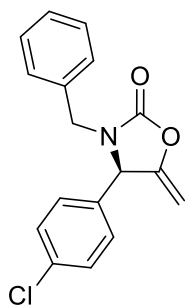

Yellow oil, 17.6 mg, 58% yield, 92% *ee*.  $[\alpha]_D^{20} = -35.10$  (c 0.2, CHCl<sub>3</sub>). <sup>1</sup>H NMR (400 MHz, CDCl<sub>3</sub>)  $\delta$  7.42 – 7.36 (m, 2H), 7.36 – 7.27 (m, 3H), 7.18 – 7.09 (m, 4H), 4.98 (t,  $J = 2.4$  Hz, 1H), 4.89 (d,  $J = 15.0$  Hz, 1H), 4.77 (dd,  $J = 3.3, 2.6$  Hz, 1H), 4.00 (dd,  $J = 3.4, 2.1$  Hz, 1H), 3.63 (d,  $J = 15.0$  Hz, 1H) ppm. <sup>13</sup>C NMR (101 MHz, CDCl<sub>3</sub>)  $\delta$  155.13, 154.40, 135.46, 135.40, 134.69, 129.66, 129.36, 129.08, 128.68, 128.44, 88.83, 61.34, 45.75 ppm. IR (neat)  $\nu$  3047, 3031, 2962, 2835, 2350, 1948 cm<sup>-1</sup>; HRMS (ESI) *m/z*: calcd. for C<sub>17</sub>H<sub>14</sub>NO<sub>2</sub>NaCl<sup>+</sup> [M+Na]<sup>+</sup>: 322.0605, Found: 322.0607. The enantiomeric excess was determined by HPLC on Chiralcel IA column, n-hexane : isopropanol = 95 : 5, flow rate = 0.5 mL/min, UV detection at  $\lambda = 214$  nm,  $t_R = 19.9$  min (minor),  $t_R = 22.0$  min (major).

**(*R*)-3-benzyl-4-(4-bromophenyl)-5-methyleneoxazolidin-2-one (3ea)**

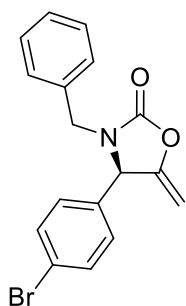

Yellow oil, 16.2 mg, 47% yield, 92% *ee*.  $[\alpha]_D^{20} = -49.00$  (c 0.2, CHCl<sub>3</sub>). <sup>1</sup>H NMR (400 MHz, CDCl<sub>3</sub>)  $\delta$  7.59 – 7.52 (m, 2H), 7.37 – 7.30 (m, 3H), 7.16 – 7.06 (m, 4H), 4.97 (t,  $J = 2.4$  Hz, 1H), 4.89 (d,  $J = 15.0$  Hz, 1H), 4.77 (dd,  $J = 3.4, 2.6$  Hz, 1H), 4.00 (dd,  $J = 3.4, 2.1$  Hz, 1H), 3.63 (d,  $J = 15.0$  Hz, 1H) ppm. <sup>13</sup>C NMR (101 MHz, CDCl<sub>3</sub>)  $\delta$  155.13, 154.30, 135.93, 134.67, 132.62, 129.64, 129.08, 128.68, 128.45, 123.61, 88.86, 61.41, 45.75 ppm. IR (neat)  $\nu$  3027, 2924, 2347, 2128, 2070, 1954, 1910, 1887 cm<sup>-1</sup>; HRMS (ESI) *m/z*: calcd. for C<sub>17</sub>H<sub>14</sub>NO<sub>2</sub>NaBr<sup>+</sup> [M+Na]<sup>+</sup>: 366.0100, Found: 366.0101. The

enantiomeric excess was determined by HPLC on Chiralcel IA column, n-hexane : isopropanol = 95 : 5, flow rate = 0.5 mL/min, UV detection at  $\lambda = 214$  nm,  $t_R = 20.7$  min (minor),  $t_R = 23.2$  min (major).

**(R)-3-benzyl-5-methylene-4-(4-(trifluoromethyl)phenyl)oxazolidin-2-one (3fa)**

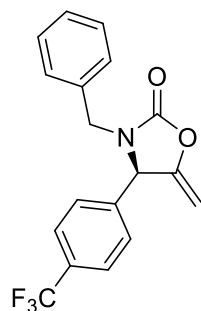

Yellow solid, 19.6 mg, 59% yield, 91% *ee*. M. P. 89-91 °C.  $[\alpha]_D^{20} = -32.20$  (c 0.2, CHCl<sub>3</sub>). <sup>1</sup>H NMR (400 MHz, CDCl<sub>3</sub>)  $\delta$  7.67 (d,  $J = 8.1$  Hz, 2H), 7.38 – 7.29 (m, 5H), 7.16 – 7.09 (m, 2H), 5.07 (t,  $J = 2.4$  Hz, 1H), 4.90 (d,  $J = 15.0$  Hz, 1H), 4.80 (t,  $J = 2.6$  Hz, 1H), 4.01 (dd,  $J = 3.5, 2.2$  Hz, 1H), 3.66 (d,  $J = 15.0$  Hz, 1H) ppm. <sup>13</sup>C NMR (101 MHz, CDCl<sub>3</sub>)  $\delta$  155.14, 153.92, 140.90 (q,  $J = 1.4$  Hz), 134.53, 131.70 (q,  $J = 32.9$  Hz), 129.13, 128.67, 128.51, 128.35, 126.43 (q,  $J = 3.8$  Hz), 123.85 (q,  $J = 273.3$  Hz), 89.14, 61.49, 45.95 ppm. <sup>19</sup>F NMR (376 MHz, CDCl<sub>3</sub>)  $\delta$  -62.80 ppm. IR (neat)  $\nu$  3031, 2959, 2925, 2853, 2642, 2350, 2090, 1932 cm<sup>-1</sup>; HRMS (ESI)  $m/z$ : calcd. for C<sub>18</sub>H<sub>14</sub>NO<sub>2</sub>F<sub>3</sub>Na<sup>+</sup> [M+Na]<sup>+</sup>: 356.0869, Found: 356.0876. The enantiomeric excess was determined by HPLC on Chiralcel IA column, n-hexane : isopropanol = 95 : 5, flow rate = 1.0 mL/min, UV detection at  $\lambda = 214$  nm,  $t_R = 9.2$  min (minor),  $t_R = 10.4$  min (major).

**(R)-3-benzyl-5-methylene-4-(4-(trifluoromethoxy)phenyl)oxazolidin-2-one (3ga)**

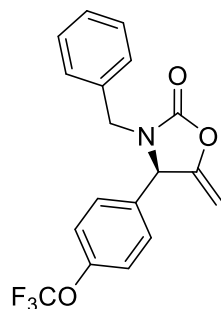

Yellow oil, 23.0 mg, 66% yield, 90% *ee*.  $[\alpha]_D^{20} = -19.70$  (c 0.2, CHCl<sub>3</sub>). <sup>1</sup>H NMR (400 MHz, CDCl<sub>3</sub>)  $\delta$  7.38 (t, *J* = 8.0 Hz, 1H), 7.25 (dd, *J* = 4.9, 2.0 Hz, 3H), 7.21 – 7.17 (m, 1H), 7.12 – 7.08 (m, 1H), 7.07 – 7.03 (m, 2H), 6.99 – 6.97 (m, 1H), 4.94 (t, *J* = 2.3 Hz, 1H), 4.83 (d, *J* = 14.9 Hz, 1H), 4.73 (dd, *J* = 3.4, 2.6 Hz, 1H), 3.96 (dd, *J* = 3.4, 2.1 Hz, 1H), 3.60 (d, *J* = 14.9 Hz, 1H) ppm. <sup>13</sup>C NMR (101 MHz, CDCl<sub>3</sub>)  $\delta$  155.10, 153.97, 149.88 (q, *J* = 1.9 Hz), 139.27, 134.53, 130.97, 129.10, 128.70, 128.51, 126.21, 121.84, 120.66, 120.5 (q, *J* = 259.0 Hz) 89.11, 61.48, 45.95 ppm. <sup>19</sup>F NMR (376 MHz, CDCl<sub>3</sub>)  $\delta$  -57.90 ppm. IR (neat)  $\nu$  3066, 3032, 2927, 2859, 2470, 1958 cm<sup>-1</sup>; HRMS (ESI) *m/z*: calcd. for C<sub>18</sub>H<sub>14</sub>NO<sub>3</sub>F<sub>3</sub>Na<sup>+</sup> [M+Na]<sup>+</sup>: 372.0818, Found: 372.0811. The enantiomeric excess was determined by HPLC on Chiralcel IA column, n-hexane : isopropanol = 95 : 5, flow rate = 1.0 mL/min, UV detection at  $\lambda = 214$  nm, *t<sub>R</sub>* = 7.7 min (minor), *t<sub>R</sub>* = 8.7 min (major).

**(*R*)-3-benzyl-5-methylene-4-(4-(pyridin-2-yl)phenyl)oxazolidin-2-one (3ha)**

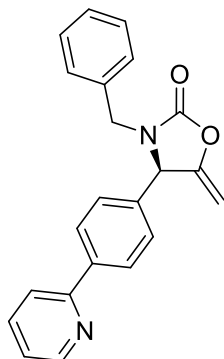

Yellow oil, 18.5 mg, 54% yield, 90% *ee*.  $[\alpha]_D^{20} = -88.50$  (c 0.2, CHCl<sub>3</sub>). <sup>1</sup>H NMR (400 MHz, CDCl<sub>3</sub>)  $\delta$  8.72 (dd, *J* = 4.7, 1.6 Hz, 1H), 8.07 – 7.98 (m, 2H), 7.83 – 7.72 (m, 2H), 7.36 – 7.23 (m, 6H), 7.18 – 7.12 (m, 2H), 5.06 (d, *J* = 2.4 Hz, 1H), 4.93 (d, *J* = 14.9 Hz, 1H), 4.78 (t, *J* = 2.9 Hz, 1H), 4.05 (dd, *J* = 3.3, 2.1 Hz, 1H), 3.67 (d, *J* = 15.0 Hz, 1H) ppm. <sup>13</sup>C NMR (101 MHz, CDCl<sub>3</sub>)  $\delta$  156.58, 155.22, 154.59, 149.92, 140.59, 137.37, 137.06, 134.80, 128.99, 128.71, 128.38, 128.32, 127.92, 122.68, 120.77, 88.61, 61.63, 45.63 ppm. IR (neat)  $\nu$  3297, 3062, 3030, 3011, 2925, 2111, 1956, 1924 cm<sup>-1</sup>; HRMS (ESI) *m/z*: calcd. for C<sub>22</sub>H<sub>19</sub>N<sub>2</sub>O<sub>2</sub><sup>+</sup> [M+H]<sup>+</sup>: 343.1441, Found: 343.1441. The enantiomeric excess was determined by HPLC on Chiralcel IA column, n-hexane :

isopropanol = 90 : 10, flow rate = 1.0 mL/min, UV detection at  $\lambda = 254$  nm,  $t_R = 18.1$  min (minor),  $t_R = 20.7$  min (major).

**(R)-3-benzyl-5-methylene-4-(m-tolyl)oxazolidin-2-one (3ia)**

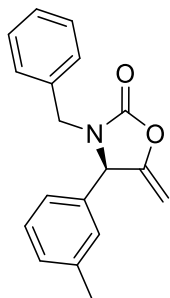

White solid, 15.4 mg, 55% yield, 89% *ee*. M. P. 82-84 °C.  $[\alpha]_D^{20} = -16.10$  (c 0.2, CHCl<sub>3</sub>). <sup>1</sup>H NMR (400 MHz, CDCl<sub>3</sub>)  $\delta$  7.36 – 7.30 (m, 3H), 7.30 – 7.27 (m, 1H), 7.20 (d, *J* = 7.6 Hz, 1H), 7.17 – 7.13 (m, 2H), 7.00 (d, *J* = 8.0 Hz, 2H), 4.98 (t, *J* = 2.3 Hz, 1H), 4.88 (d, *J* = 14.9 Hz, 1H), 4.75 (t, *J* = 2.9 Hz, 1H), 4.02 (dd, *J* = 3.2, 2.1 Hz, 1H), 3.65 (d, *J* = 15.0 Hz, 1H), 2.37 (s, 3H) ppm. <sup>13</sup>C NMR (101 MHz, CDCl<sub>3</sub>)  $\delta$  155.33, 154.90, 139.31, 136.83, 135.07, 130.18, 129.18, 128.97, 128.72, 128.34, 128.28, 125.11, 88.36, 62.01, 45.63, 21.53 ppm. IR (neat)  $\nu$  3024, 2923, 2854, 2738, 2632, 2459, 1957, 1902 cm<sup>-1</sup>; HRMS (ESI) *m/z*: calcd. for C<sub>18</sub>H<sub>17</sub>NO<sub>2</sub>Na<sup>+</sup> [M+Na]<sup>+</sup>: 302.1152, Found: 302.1154. The enantiomeric excess was determined by HPLC on Chiralcel IA column, n-hexane : isopropanol = 95 : 5, flow rate = 1.0 mL/min, UV detection at  $\lambda = 214$  nm,  $t_R = 8.0$  min (minor),  $t_R = 9.0$  min (major).

**(R)-3-benzyl-4-(3-chlorophenyl)-5-methyleneoxazolidin-2-one (3ja)**

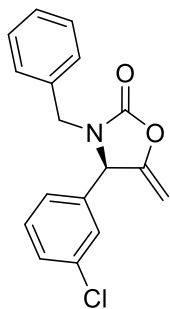

Yellow solid, 12.1 mg, 40% yield, 91% *ee*. M. P. 77-79 °C.  $[\alpha]_D^{20} = -33.80$  (c 0.2, CHCl<sub>3</sub>). <sup>1</sup>H NMR (400 MHz, CDCl<sub>3</sub>)  $\delta$  7.42 – 7.30 (m, 5H), 7.20 (t, *J* = 1.9 Hz, 1H),

7.16 – 7.08 (m, 3H), 4.98 (t,  $J = 2.4$  Hz, 1H), 4.90 (d,  $J = 15.0$  Hz, 1H), 4.78 (dd,  $J = 3.4, 2.5$  Hz, 1H), 4.03 (dd,  $J = 3.4, 2.1$  Hz, 1H), 3.67 (d,  $J = 14.9$  Hz, 1H) ppm.  $^{13}\text{C}$  NMR (101 MHz,  $\text{CDCl}_3$ )  $\delta$  155.12, 154.05, 138.95, 135.37, 134.65, 130.69, 129.68, 129.08, 128.68, 128.46, 128.01, 126.07, 88.99, 61.45, 45.85 ppm. IR (neat)  $\nu$  3542, 3186, 3030, 2959, 2923, 2853, 2636, 2457, 2328, 1956, 1891  $\text{cm}^{-1}$ ; HRMS (ESI)  $m/z$ : calcd. for  $\text{C}_{17}\text{H}_{14}\text{NO}_2\text{ClNa}^+$   $[\text{M}+\text{Na}]^+$ : 322.0605, Found: 322.0599. The enantiomeric excess was determined by HPLC on Chiralcel IA column, n-hexane : isopropanol = 90 : 10, flow rate = 1.0 mL/min, UV detection at  $\lambda = 214$  nm,  $t_{\text{R}} = 9.3$  min (minor),  $t_{\text{R}} = 9.9$  min (major).

**(R)-3-benzyl-5-methylene-4-(3,4,5-trimethoxyphenyl)oxazolidin-2-one (3ka)**

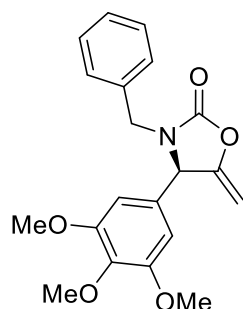

Red oil, 25.6 mg, 72% yield, 80% *ee*.  $[\alpha]_{\text{D}}^{20} = -4.70$  (c 0.2,  $\text{CHCl}_3$ ).  $^1\text{H}$  NMR (400 MHz,  $\text{CDCl}_3$ )  $\delta$  7.35 – 7.30 (m, 3H), 7.19 – 7.14 (m, 2H), 6.37 (s, 2H), 4.95 (t,  $J = 2.4$  Hz, 1H), 4.84 (d,  $J = 15.0$  Hz, 1H), 4.80 – 4.76 (m, 1H), 4.09 (dd,  $J = 3.2, 2.1$  Hz, 1H), 3.87 (s, 3H), 3.83 (s, 6H), 3.77 (d,  $J = 14.9$  Hz, 1H) ppm.  $^{13}\text{C}$  NMR (101 MHz,  $\text{CDCl}_3$ )  $\delta$  155.19, 154.47, 153.85, 138.60, 135.02, 132.11, 128.86, 128.67, 128.26, 104.78, 88.50, 62.45, 60.94, 56.31, 45.81 ppm. IR (neat)  $\nu$  3508, 3290, 3065, 3011, 2937, 2837, 2329, 2116, 1959  $\text{cm}^{-1}$ ; HRMS (ESI)  $m/z$ : calcd. for  $\text{C}_{20}\text{H}_{21}\text{NO}_5\text{Na}^+$   $[\text{M}+\text{Na}]^+$ : 378.1312, Found: 378.1311. The enantiomeric excess was determined by HPLC on Chiralcel IA column, n-hexane : isopropanol = 90 : 10, flow rate = 1.0 mL/min, UV detection at  $\lambda = 254$  nm,  $t_{\text{R}} = 16.0$  min (minor),  $t_{\text{R}} = 13.3$  min (major).

**(R)-3-(4-methylbenzyl)-5-methylene-4-phenyloxazolidin-2-one (3ab)**

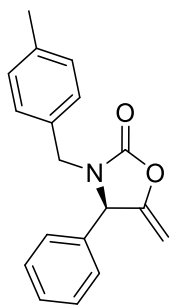

Yellow oil, 14.1 mg, 50% yield, 92% *ee*.  $[\alpha]_D^{20} = -49.50$  (c 0.2,  $\text{CHCl}_3$ ).  $^1\text{H NMR}$  (400 MHz,  $\text{CDCl}_3$ )  $\delta$  7.41 (dd,  $J = 5.1, 1.9$  Hz, 3H), 7.24 – 7.20 (m, 2H), 7.13 (d,  $J = 7.8$  Hz, 2H), 7.03 (d,  $J = 8.0$  Hz, 2H), 4.99 (t,  $J = 2.4$  Hz, 1H), 4.87 (d,  $J = 14.9$  Hz, 1H), 4.74 (t,  $J = 2.9$  Hz, 1H), 4.00 (dd,  $J = 3.2, 2.1$  Hz, 1H), 3.58 (d,  $J = 14.8$  Hz, 1H), 2.35 (s, 3H) ppm.  $^{13}\text{C NMR}$  (101 MHz,  $\text{CDCl}_3$ )  $\delta$  155.27, 154.90, 138.12, 136.95, 131.87, 129.66, 129.38, 128.73, 127.97, 88.39, 61.87, 45.33, 21.29 ppm. IR (neat)  $\nu$  3028, 2922, 2859, 2332, 2118, 1911, 1778  $\text{cm}^{-1}$ ; HRMS (ESI)  $m/z$ : calcd. for  $\text{C}_{18}\text{H}_{17}\text{NO}_2\text{Na}^+$   $[\text{M}+\text{Na}]^+$ : 302.1152, Found: 302.1148. The enantiomeric excess was determined by HPLC on Chiralcel IA column, n-hexane : isopropanol = 99 : 1, flow rate = 1.0 mL/min, UV detection at  $\lambda = 214$  nm,  $t_R = 21.0$  min (minor),  $t_R = 22.5$  min (major).

**(R)-3-(4-(tert-butyl)benzyl)-5-methylene-4-phenyloxazolidin-2-one (3ac)**

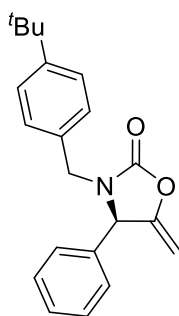

Yellow oil, 15.1 mg, 47% yield, 87% *ee*.  $[\alpha]_D^{20} = -58.80$  (c 0.2,  $\text{CHCl}_3$ ).  $^1\text{H NMR}$  (400 MHz,  $\text{CDCl}_3$ )  $\delta$  7.44 – 7.39 (m, 3H), 7.36 – 7.31 (m, 2H), 7.25 – 7.22 (m, 2H), 7.10 – 7.05 (m, 2H), 5.04 (t,  $J = 2.4$  Hz, 1H), 4.85 (d,  $J = 14.9$  Hz, 1H), 4.75 (t,  $J = 2.9$  Hz, 1H), 4.01 (dd,  $J = 3.2, 2.1$  Hz, 1H), 3.61 (d,  $J = 14.9$  Hz, 1H), 1.32 (s, 9H) ppm.  $^{13}\text{C NMR}$  (101 MHz,  $\text{CDCl}_3$ )  $\delta$  155.28, 154.93, 151.34, 137.02, 131.90, 129.36, 128.51, 127.98, 125.89, 88.38, 61.97, 45.24, 34.72, 31.44 ppm. IR (neat)  $\nu$  3061, 3030, 2960, 2867, 2332, 2118, 1916, 1781  $\text{cm}^{-1}$ ; HRMS (ESI)  $m/z$ : calcd. for  $\text{C}_{21}\text{H}_{23}\text{NO}_2\text{Na}^+$

[M+Na]<sup>+</sup>: 344.1621, Found: 344.1616. The enantiomeric excess was determined by HPLC on Chiralcel IA column, n-hexane : isopropanol = 95 : 5, flow rate = 1.0 mL/min, UV detection at  $\lambda = 214$  nm,  $t_R = 8.8$  min (minor),  $t_R = 7.7$  min (major).

**(R)-3-(4-fluorobenzyl)-5-methylene-4-phenyloxazolidin-2-one (3ad)**

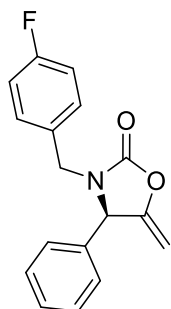

White solid, 18.9 mg, 67% yield, 91% *ee*. M. P. 99-101 °C.  $[\alpha]_D^{20} = -19.50$  (c 0.2, CHCl<sub>3</sub>). <sup>1</sup>H NMR (400 MHz, CDCl<sub>3</sub>)  $\delta$  7.44 – 7.38 (m, 3H), 7.25 – 7.16 (m, 2H), 7.16 – 7.07 (m, 2H), 7.04 – 6.96 (m, 2H), 5.00 (t,  $J = 2.4$  Hz, 1H), 4.82 (d,  $J = 15.0$  Hz, 1H), 4.77 (t,  $J = 2.9$  Hz, 1H), 4.03 (dd,  $J = 3.3, 2.2$  Hz, 1H), 3.66 (d,  $J = 15.0$  Hz, 1H) ppm. <sup>13</sup>C NMR (101 MHz, CDCl<sub>3</sub>)  $\delta$  162.7 (d,  $J = 247.0$  Hz), 155.23, 154.70, 136.72, 130.83 (d,  $J = 3.3$  Hz), 130.5 (d,  $J = 8.2$  Hz), 129.51, 129.44, 127.95, 115.92 (d,  $J = 21.6$  Hz), 88.69, 62.10, 44.99 ppm. <sup>19</sup>F NMR (376 MHz, CDCl<sub>3</sub>)  $\delta$  -113.72 ppm. IR (neat)  $\nu$  3189, 3067, 3031, 2961, 2926, 2852, 2667, 1953 cm<sup>-1</sup>; HRMS (ESI)  $m/z$ : calcd. for C<sub>17</sub>H<sub>14</sub>NO<sub>2</sub>NaF<sup>+</sup> [M+Na]<sup>+</sup>: 306.0901, Found: 306.0902. The enantiomeric excess was determined by HPLC on Chiralcel IA column, n-hexane : isopropanol = 95 : 5, flow rate = 1.0 mL/min, UV detection at  $\lambda = 214$  nm,  $t_R = 9.7$  min (minor),  $t_R = 10.4$  min (major).

**(R)-3-(4-bromobenzyl)-5-methylene-4-phenyloxazolidin-2-one (3ae)**

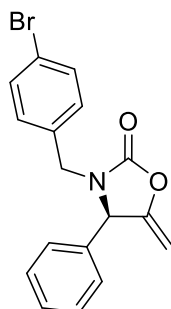



Yellow oil, 21.0 mg, 61% yield, 96% *ee*.  $[\alpha]_D^{20} = -76.30$  (c 0.2, CHCl<sub>3</sub>). <sup>1</sup>H NMR (400 MHz, CDCl<sub>3</sub>) δ 7.47 – 7.38 (m, 5H), 7.23 – 7.17 (m, 2H), 7.01 (d, *J* = 8.3 Hz, 2H), 4.99 (t, *J* = 2.4 Hz, 1H), 4.83 – 4.75 (m, 2H), 4.03 (dd, *J* = 3.3, 2.2 Hz, 1H), 3.63 (d, *J* = 15.1 Hz, 1H) ppm. <sup>13</sup>C NMR (101 MHz, CDCl<sub>3</sub>) δ 155.24, 154.61, 136.62, 134.02, 132.16, 130.41, 129.56, 129.47, 127.96, 122.41, 88.80, 62.12, 45.09 ppm. IR (neat) ν 3063, 3031, 2924, 2855, 2120, 1905 cm<sup>-1</sup>; HRMS (ESI) *m/z*: calcd. for C<sub>17</sub>H<sub>14</sub>NO<sub>2</sub>NaBr<sup>+</sup> [M+Na]<sup>+</sup>: 366.0100, Found: 366.0099. The enantiomeric excess was determined by HPLC on Chiralcel IA column, n-hexane : isopropanol = 95 : 5, flow rate = 1.0 mL/min, UV detection at λ = 214 nm, *t<sub>R</sub>* = 12.8 min (minor), *t<sub>R</sub>* = 13.8 min (major).

**(*R*)-3-(4-iodobenzyl)-5-methylene-4-phenyloxazolidin-2-one (3af)**

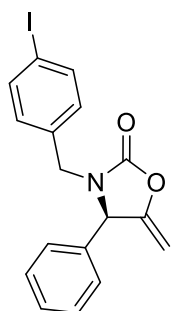

Colorless oil, 19.1 mg, 48% yield, 96% *ee*.  $[\alpha]_D^{20} = -66.50$  (c 0.2, CHCl<sub>3</sub>). <sup>1</sup>H NMR (400 MHz, CDCl<sub>3</sub>) δ 7.68 – 7.62 (m, 2H), 7.44 – 7.37 (m, 3H), 7.20 (dd, *J* = 6.5, 2.9 Hz, 2H), 6.88 (d, *J* = 8.0 Hz, 2H), 4.99 (t, *J* = 2.4 Hz, 1H), 4.84 – 4.74 (m, 2H), 4.03 (dd, *J* = 3.3, 2.1 Hz, 1H), 3.61 (d, *J* = 15.1 Hz, 1H) ppm. <sup>13</sup>C NMR (101 MHz, CDCl<sub>3</sub>) δ 155.24, 154.60, 138.13, 136.61, 134.66, 130.61, 129.55, 129.46, 127.95, 94.00, 88.81, 62.11, 45.19 ppm. IR (neat) ν 3031, 2922, 2853, 2333, 2118, 1908, 1777 cm<sup>-1</sup>; HRMS (ESI) *m/z*: calcd. for C<sub>17</sub>H<sub>14</sub>NO<sub>2</sub>NaI<sup>+</sup> [M+Na]<sup>+</sup>: 413.9961, Found: 413.9966. The enantiomeric excess was determined by HPLC on Chiralcel IA column, n-hexane : isopropanol = 99 : 1, flow rate = 1.0 mL/min, UV detection at λ = 214 nm, *t<sub>R</sub>* = 29.4 min (minor), *t<sub>R</sub>* = 31.2 min (major).

**(*R*)-4-((5-methylene-2-oxo-4-phenyloxazolidin-3-yl)methyl)benzotrile (3ag)**

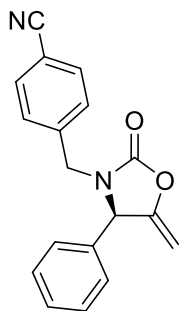

White solid, 12.7 mg, 44% yield, 90% *ee*. M. P. 94-96 °C.  $[\alpha]_D^{20} = -68.40$  (c 0.2, CHCl<sub>3</sub>). <sup>1</sup>H NMR (400 MHz, CDCl<sub>3</sub>) δ 7.56 – 7.51 (m, 2H), 7.36 – 7.31 (m, 3H), 7.21 – 7.15 (m, 2H), 7.15 – 7.10 (m, 2H), 4.96 (t, *J* = 2.4 Hz, 1H), 4.78 – 4.69 (m, 2H), 4.01 (dd, *J* = 3.4, 2.1 Hz, 1H), 3.76 (d, *J* = 15.4 Hz, 1H) ppm. <sup>13</sup>C NMR (101 MHz, CDCl<sub>3</sub>) δ 155.26, 154.33, 140.52, 136.32, 132.76, 129.74, 129.52, 129.20, 127.96, 118.49, 112.29, 89.21, 62.60, 45.44 ppm. IR (neat) ν 3065, 3030, 2861, 2923, 2853, 2351, 2229, 2089, 1923 cm<sup>-1</sup>; HRMS (ESI) *m/z*: calcd. for C<sub>18</sub>H<sub>14</sub>N<sub>2</sub>O<sub>2</sub>Na<sup>+</sup> [M+Na]<sup>+</sup>: 313.0948, Found: 313.0942. The enantiomeric excess was determined by HPLC on Chiralcel IA column, n-hexane : isopropanol = 95 : 5, flow rate = 1.0 mL/min, UV detection at λ = 214 nm, *t*<sub>R</sub> = 27.9 min (minor), *t*<sub>R</sub> = 32.0 min (major).

**(*R*)-3-(3-bromobenzyl)-5-methylene-4-phenyloxazolidin-2-one (3ah)**

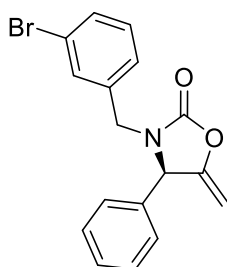

White solid, 20.0 mg, 58% yield, 92% *ee*. M. P. 72-74 °C.  $[\alpha]_D^{20} = -30.50$  (c 0.2, CHCl<sub>3</sub>). <sup>1</sup>H NMR (400 MHz, CDCl<sub>3</sub>) δ 7.48 – 7.35 (m, 4H), 7.29 – 7.15 (m, 4H), 7.08 (d, *J* = 7.6 Hz, 1H), 5.03 (s, 1H), 4.86 – 4.72 (m, 2H), 4.06 (t, *J* = 2.8 Hz, 1H), 3.66 (d, *J* = 15.1 Hz, 1H) ppm. <sup>13</sup>C NMR (101 MHz, CDCl<sub>3</sub>) δ 155.21, 154.58, 137.30, 136.57, 131.64, 131.49, 130.58, 129.61, 129.48, 127.98, 127.27, 123.01, 88.88, 62.25, 45.14 ppm. IR (neat) ν 3061, 3028, 2960, 2924, 2852, 2132, 1944, 1877 cm<sup>-1</sup>; HRMS (ESI) *m/z*: calcd. for C<sub>17</sub>H<sub>14</sub>NO<sub>2</sub>NaBr<sup>+</sup> [M+Na]<sup>+</sup>: 366.0100, Found: 366.0099. The

enantiomeric excess was determined by HPLC on Chiralcel IC column, n-hexane : isopropanol = 95 : 5, flow rate = 1.0 mL/min, UV detection at  $\lambda = 214$  nm,  $t_R = 22.6$  min (minor),  $t_R = 20.1$  min (major).

**(R)-3-(3-iodobenzyl)-5-methylene-4-phenyloxazolidin-2-one (3ai)**

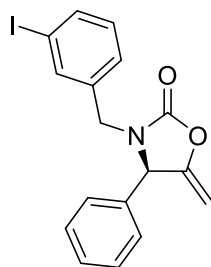

Yellow solid, 20.8 mg, 53% yield, 92% *ee*. M. P. 94-96 °C.  $[\alpha]_D^{20} = -33.30$  (c 0.2, CHCl<sub>3</sub>). <sup>1</sup>H NMR (400 MHz, CDCl<sub>3</sub>)  $\delta$  7.64 (d, *J* = 7.8 Hz, 1H), 7.43 (dd, *J* = 7.8, 3.7 Hz, 4H), 7.21 (dd, *J* = 6.8, 2.9 Hz, 2H), 7.12 (d, *J* = 7.7 Hz, 1H), 7.06 (t, *J* = 7.7 Hz, 1H), 5.02 (s, 1H), 4.77 (d, *J* = 15.1 Hz, 2H), 4.05 (t, *J* = 2.8 Hz, 1H), 3.63 (d, *J* = 15.0 Hz, 1H) ppm. <sup>13</sup>C NMR (101 MHz, CDCl<sub>3</sub>)  $\delta$  155.14, 154.57, 137.53, 137.39, 137.29, 136.54, 130.65, 129.58, 129.43, 127.94, 127.89, 94.73, 88.80, 62.24, 45.02 ppm. IR (neat)  $\nu$  3131, 3057, 3026, 2961, 2924, 2853, 2086, 1946, 1877 cm<sup>-1</sup>; HRMS (ESI) *m/z*: calcd. for C<sub>17</sub>H<sub>14</sub>NO<sub>2</sub>NaI<sup>+</sup> [M+Na]<sup>+</sup>: 413.9961, Found: 413.9964. The enantiomeric excess was determined by HPLC on Chiralcel IC column, n-hexane : isopropanol = 95 : 5, flow rate = 1.0 mL/min, UV detection at  $\lambda = 214$  nm,  $t_R = 23.7$  min (minor),  $t_R = 21.1$  min (major).

**(R)-5-methylene-3-(3-nitrobenzyl)-4-phenyloxazolidin-2-one (3aj)**

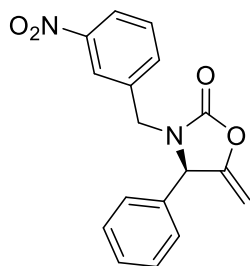

Brown solid, 14.2 mg, 45% yield, 86% *ee*. M. P. 97-99 °C.  $[\alpha]_D^{20} = -18.30$  (c 0.2, CHCl<sub>3</sub>). <sup>1</sup>H NMR (400 MHz, CDCl<sub>3</sub>)  $\delta$  8.17 – 8.12 (m, 1H), 7.88 (t, *J* = 2.0 Hz, 1H),

7.59 – 7.46 (m, 2H), 7.41 – 7.38 (m, 3H), 7.25 – 7.16 (m, 2H), 5.07 (t,  $J = 2.3$  Hz, 1H), 4.85 – 4.75 (m, 2H), 4.08 (dd,  $J = 3.4, 2.1$  Hz, 1H), 3.96 (d,  $J = 15.3$  Hz, 1H) ppm.  $^{13}\text{C}$  NMR (101 MHz,  $\text{CDCl}_3$ )  $\delta$  155.22, 154.34, 148.48, 137.36, 136.34, 134.70, 130.12, 129.79, 129.58, 128.01, 123.41, 123.31, 89.26, 62.82, 45.29 ppm. IR (neat)  $\nu$  3084, 3029, 2959, 2922, 2853, 2333, 2118, 1970, 1921, 1765  $\text{cm}^{-1}$ ; HRMS (ESI)  $m/z$ : calcd. for  $\text{C}_{17}\text{H}_{14}\text{N}_2\text{O}_4\text{Na}^+$   $[\text{M}+\text{Na}]^+$ : 333.0846, Found: 333.0843. The enantiomeric excess was determined by HPLC on Chiralcel IB column, n-hexane : isopropanol = 90 : 10, flow rate = 1.0 mL/min, UV detection at  $\lambda = 214$  nm,  $t_{\text{R}} = 14.5$  min (minor),  $t_{\text{R}} = 16.2$  min (major).

**(R)-methyl 3-((5-methylene-2-oxo-4-phenyloxazolidin-3-yl)methyl)benzoate (3ak)**

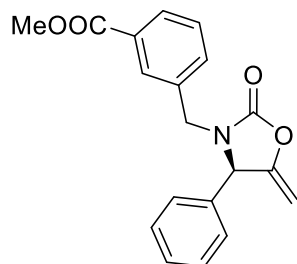

White solid, 18.6 mg, 57% yield, 91% *ee*. M. P. 99-101 °C.  $[\alpha]_{\text{D}}^{20} = -18.00$  (c 0.2,  $\text{CHCl}_3$ ).  $^1\text{H}$  NMR (400 MHz,  $\text{CDCl}_3$ )  $\delta$  8.00 – 7.96 (m, 1H), 7.77 (d,  $J = 1.8$  Hz, 1H), 7.44 – 7.34 (m, 5H), 7.23 – 7.17 (m, 2H), 5.02 (t,  $J = 2.3$  Hz, 1H), 4.87 (d,  $J = 15.1$  Hz, 1H), 4.78 (t,  $J = 2.9$  Hz, 1H), 4.04 (dd,  $J = 3.3, 2.2$  Hz, 1H), 3.92 (s, 3H), 3.76 (d,  $J = 15.1$  Hz, 1H) ppm.  $^{13}\text{C}$  NMR (101 MHz,  $\text{CDCl}_3$ )  $\delta$  166.73, 155.24, 154.64, 136.62, 135.46, 133.14, 130.90, 129.65, 129.55, 129.54, 129.46, 129.19, 127.97, 88.79, 62.26, 52.39, 45.40 ppm. IR (neat)  $\nu$  3410, 3081, 3007, 2957, 2851, 2082, 1911  $\text{cm}^{-1}$ ; HRMS (ESI)  $m/z$ : calcd. for  $\text{C}_{19}\text{H}_{17}\text{NO}_4\text{Na}^+$   $[\text{M}+\text{Na}]^+$ : 346.1050, Found: 346.1049. The enantiomeric excess was determined by HPLC on Chiralcel IB-3 column, n-hexane : isopropanol = 90 : 10, flow rate = 1.0 mL/min, UV detection at  $\lambda = 214$  nm,  $t_{\text{R}} = 9.1$  min (minor),  $t_{\text{R}} = 9.5$  min (major).

**(R)-3-(2-chlorobenzyl)-5-methylene-4-phenyloxazolidin-2-one (3al)**

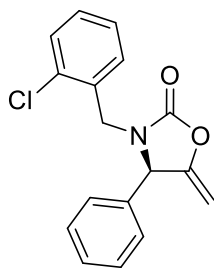

White solid, 20.7 mg, 69% yield, 91% *ee*. M. P. 91-93 °C.  $[\alpha]_D^{20} = 15.10$  (c 0.2, CHCl<sub>3</sub>). <sup>1</sup>H NMR (400 MHz, CDCl<sub>3</sub>) δ 7.34 – 7.23 (m, 4H), 7.21 – 7.08 (m, 5H), 5.01 (t, *J* = 2.3 Hz, 1H), 4.77 (d, *J* = 15.4 Hz, 1H), 4.70 (dd, *J* = 3.3, 2.5 Hz, 1H), 4.01 – 3.93 (m, 2H) ppm. <sup>13</sup>C NMR (101 MHz, CDCl<sub>3</sub>) δ 155.27, 154.71, 137.05, 133.96, 132.63, 130.84, 129.95, 129.67, 129.37, 129.31, 127.68, 127.25, 88.55, 62.61, 43.39 ppm. IR (neat) ν 3189, 3069, 3012, 2959, 2924, 2853, 2640, 2328 cm<sup>-1</sup>; HRMS (ESI) *m/z*: calcd. for C<sub>17</sub>H<sub>14</sub>NO<sub>2</sub>NaCl<sup>+</sup> [M+Na]<sup>+</sup>: 322.0605, Found: 322.0603. The enantiomeric excess was determined by HPLC on Chiralcel IA column, n-hexane : isopropanol = 95 : 5, flow rate = 1.0 mL/min, UV detection at λ = 214 nm, *t*<sub>R</sub> = 10.0 min (minor), *t*<sub>R</sub> = 11.0 min (major).

**(*R*)-3-(4-bromo-2-fluorobenzyl)-5-methylene-4-phenyloxazolidin-2-one (3am)**

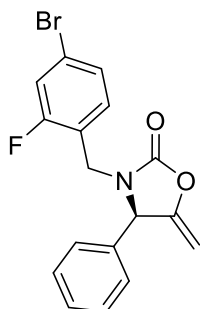

White solid, 16.0 mg, 44% yield, 92% *ee*. M. P. 89-91 °C.  $[\alpha]_D^{20} = -85.0$  (c 0.2, CHCl<sub>3</sub>). <sup>1</sup>H NMR (400 MHz, CDCl<sub>3</sub>) δ 7.42 – 7.38 (m, 3H), 7.26 – 7.21 (m, 3H), 7.20 – 7.13 (m, 2H), 5.08 (t, *J* = 2.3 Hz, 1H), 4.78 (dd, *J* = 3.3, 2.5 Hz, 1H), 4.65 (d, *J* = 15.2 Hz, 1H), 4.06 (dd, *J* = 3.3, 2.1 Hz, 1H), 3.92 (d, *J* = 15.3 Hz, 1H). <sup>13</sup>C NMR (101 MHz, CDCl<sub>3</sub>) δ 160.72 (d, *J* = 253.1 Hz), 155.17, 154.59, 136.77, 132.37 (d, *J* = 4.5 Hz), 129.53, 129.38, 128.07 (d, *J* = 3.7 Hz), 127.86, 122.72 (d, *J* = 9.4 Hz), 121.50 (d, *J* = 15.4 Hz), 119.42 (d, *J* = 24.9 Hz), 88.86, 62.74, 39.05 (d, *J* = 3.0 Hz) ppm. <sup>19</sup>F NMR

(376 MHz, CDCl<sub>3</sub>)  $\delta$  -114.85 (t,  $J$  = 8.6 Hz) ppm. IR (neat)  $\nu$  3190, 3116, 3074, 3011, 2959, 2923, 2853, 2117, 1948 cm<sup>-1</sup>; HRMS (ESI)  $m/z$ : calcd. for C<sub>17</sub>H<sub>13</sub>NO<sub>2</sub>NaFBr<sup>+</sup> [M+Na]<sup>+</sup>: 384.0006, Found: 384.0009. The enantiomeric excess was determined by HPLC on Chiralcel IB column, n-hexane : isopropanol = 99 : 1, flow rate = 1.0 mL/min, UV detection at  $\lambda$  = 214 nm,  $t_R$  = 15.0 min (minor),  $t_R$  = 16.2 min (major).

**(R)-5-methylene-4-phenyl-3-(2,4,6-trimethylbenzyl)oxazolidin-2-one (3an)**

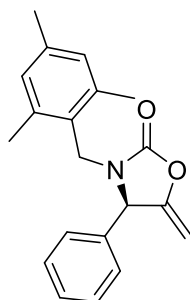

White solid, 17.0 mg, 55% yield, 80% *ee*. M. P. 77-79 °C.  $[\alpha]_D^{20}$  = 3.50 (c 0.2, CHCl<sub>3</sub>). <sup>1</sup>H NMR (400 MHz, CDCl<sub>3</sub>)  $\delta$  7.39 – 7.33 (m, 3H), 7.07 – 7.00 (m, 2H), 6.76 (s, 2H), 4.82 (d,  $J$  = 14.6 Hz, 1H), 4.71 – 4.66 (m, 2H), 4.11 (d,  $J$  = 14.6 Hz, 1H), 3.95 (dd,  $J$  = 3.1, 2.1 Hz, 1H), 2.25 (s, 3H), 1.86 (s, 6H). <sup>13</sup>C NMR (101 MHz, CDCl<sub>3</sub>)  $\delta$  155.00, 138.09, 137.91, 137.85, 129.51, 129.32, 129.13, 127.27, 127.04, 88.06, 61.54, 40.36, 21.02, 19.52 ppm. IR (neat)  $\nu$  3064, 2959, 2921, 2853, 2097, 1950, 1771 cm<sup>-1</sup>; HRMS (ESI)  $m/z$ : calcd. for C<sub>20</sub>H<sub>21</sub>NO<sub>2</sub>Na<sup>+</sup> [M+Na]<sup>+</sup>: 330.1465, Found: 330.1470. The enantiomeric excess was determined by HPLC on Chiralcel IB column, n-hexane : isopropanol = 99 : 1, flow rate = 1.0 mL/min, UV detection at  $\lambda$  = 214 nm,  $t_R$  = 12.3 min (minor),  $t_R$  = 10.9 min (major).

**(R)-3-(2,4-dimethoxybenzyl)-5-methylene-4-phenyloxazolidin-2-one (3ao)**

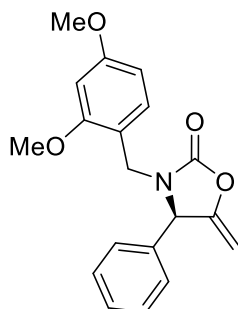

Yellow oil, 14.9 mg, 44% yield, 95% *ee*.  $[\alpha]_D^{20} = -49.00$  (c 0.2, CHCl<sub>3</sub>). <sup>1</sup>H NMR (400 MHz, CDCl<sub>3</sub>) δ 7.43 – 7.35 (m, 3H), 7.23 – 7.19 (m, 2H), 7.05 – 7.01 (m, 1H), 6.43 – 6.39 (m, 2H), 5.03 (t, *J* = 2.3 Hz, 1H), 4.71 (d, *J* = 10.0 Hz, 1H), 4.69 – 4.68 (m, 1H), 3.97 (dd, *J* = 3.1, 2.1 Hz, 1H), 3.82 (d, *J* = 13.5 Hz, 1H), 3.82(s, 3H), 3.71 (s, 3H). <sup>13</sup>C NMR (101 MHz, CDCl<sub>3</sub>) δ 161.18, 158.85, 155.27, 155.23, 137.83, 131.88, 129.09, 129.01, 127.65, 115.59, 104.23, 98.51, 87.79, 62.42, 55.54, 55.32, 40.68 ppm. IR (neat) ν 3062, 3004, 2933, 2838, 2331, 1776 cm<sup>-1</sup>; HRMS (ESI) *m/z*: calcd. for C<sub>19</sub>H<sub>19</sub>NO<sub>4</sub>Na<sup>+</sup> [M+Na]<sup>+</sup>: 348.1206, Found: 348.12053. The enantiomeric excess was determined by HPLC on Chiralcel IC column, n-hexane : isopropanol = 85 : 15, flow rate = 1.0 mL/min, UV detection at λ = 214 nm, *t<sub>R</sub>* = 25.0 min (minor), *t<sub>R</sub>* = 20.6 min (major).

**(*R*)-5-methylene-3-(naphthalen-1-ylmethyl)-4-phenyloxazolidin-2-one (3ap)**

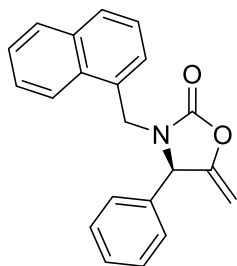

Colorless oil, 27.4 mg, 88% yield, 96% *ee*.  $[\alpha]_D^{20} = 9.40$  (c 0.2, CHCl<sub>3</sub>). <sup>1</sup>H NMR (400 MHz, CDCl<sub>3</sub>) δ 8.13 – 8.06 (m, 1H), 7.92 – 7.80 (m, 2H), 7.60 – 7.50 (m, 2H), 7.43 – 7.40 (m, 3H), 7.34 (dd, *J* = 8.3, 7.0 Hz, 1H), 7.17 (dd, *J* = 6.5, 2.9 Hz, 2H), 7.00 (d, *J* = 6.9 Hz, 1H), 5.44 (d, *J* = 14.8 Hz, 1H), 4.81 (t, *J* = 2.3 Hz, 1H), 4.69 (t, *J* = 2.8 Hz, 1H), 4.11 (d, *J* = 14.8 Hz, 1H), 3.94 (dd, *J* = 3.3, 2.1 Hz, 1H) ppm. <sup>13</sup>C NMR (101 MHz, CDCl<sub>3</sub>) δ 154.95, 154.76, 137.13, 134.01, 131.70, 130.14, 129.49, 129.35, 129.32, 128.88, 128.41, 127.66, 127.20, 126.35, 125.01, 123.73, 88.37, 62.06, 43.86 ppm. IR (neat) ν 3058, 3028, 2929, 2925, 2855, 2634, 2332, 2122 cm<sup>-1</sup>; HRMS (ESI) *m/z*: calcd. for C<sub>21</sub>H<sub>17</sub>NO<sub>2</sub>Na<sup>+</sup> [M+Na]<sup>+</sup>: 338.1152, Found: 338.1154. The enantiomeric excess was determined by HPLC on Chiralcel IC column, n-hexane : isopropanol = 95 : 5, flow rate = 1.0 mL/min, UV detection at λ = 214 nm, *t<sub>R</sub>* = 26.2 min (minor), *t<sub>R</sub>* = 23.4 min (major).

**(R)-5-methylene-3-(naphthalen-2-ylmethyl)-4-phenyloxazolidin-2-one (3aq)**

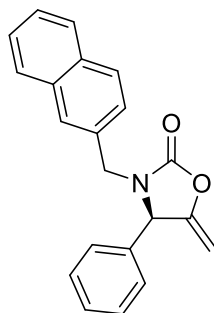

Yellow oil, 26.6 mg, 83% yield, 93% *ee*.  $[\alpha]_D^{20} = -76.60$  (c 0.2,  $\text{CHCl}_3$ ).  $^1\text{H NMR}$  (400 MHz,  $\text{CDCl}_3$ )  $\delta$  7.87 – 7.81 (m, 2H), 7.80 – 7.76 (m, 1H), 7.54 – 7.47 (m, 3H), 7.44 – 7.39 (m, 3H), 7.32 (dd,  $J = 8.5, 1.7$  Hz, 1H), 7.25 – 7.19 (m, 2H), 5.07 (d,  $J = 14.9$  Hz, 1H), 5.02 (t,  $J = 2.4$  Hz, 1H), 4.77 (t,  $J = 3.0$  Hz, 1H), 4.01 (dd,  $J = 3.3, 2.1$  Hz, 1H), 3.80 (d,  $J = 14.9$  Hz, 1H) ppm.  $^{13}\text{C NMR}$  (101 MHz,  $\text{CDCl}_3$ )  $\delta$  155.35, 154.78, 136.85, 133.32, 133.15, 132.32, 129.44, 129.39, 129.02, 127.96, 127.92, 127.86, 127.78, 126.59, 126.47, 126.22, 88.56, 62.02, 45.81 ppm. IR (neat)  $\nu$  3055, 3022, 2929, 2925, 2855, 2651, 2331, 2120, 1954  $\text{cm}^{-1}$ ; HRMS (ESI)  $m/z$ : calcd. for  $\text{C}_{21}\text{H}_{17}\text{NO}_2\text{Na}^+$   $[\text{M}+\text{Na}]^+$ : 338.1152, Found: 338.1154. The enantiomeric excess was determined by HPLC on Chiralcel IA column, n-hexane : isopropanol = 95 : 5, flow rate = 1.0 mL/min, UV detection at  $\lambda = 214$  nm,  $t_R = 15.2$  min (minor),  $t_R = 13.0$  min (major).

**(R)-5-methylene-4-phenyl-3-(3-phenylpropyl)oxazolidin-2-one (3ar)**

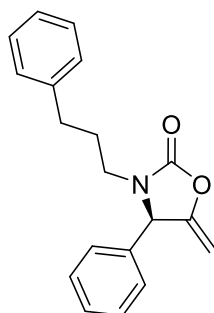

Yellow oil, 11.8 mg, 40% yield, 80% *ee*.  $[\alpha]_D^{20} = -10.00$  (c 0.2,  $\text{CHCl}_3$ ).  $^1\text{H NMR}$  (400 MHz,  $\text{CDCl}_3$ )  $\delta$  7.32 (dd,  $J = 4.9, 1.9$  Hz, 3H), 7.21 – 7.14 (m, 4H), 7.12 – 7.06 (m, 1H), 7.03 – 6.99 (m, 2H), 5.11 (t,  $J = 2.3$  Hz, 1H), 4.67 (dd,  $J = 3.2, 2.5$  Hz, 1H), 3.97 (dd,  $J = 3.2, 2.1$  Hz, 1H), 3.46 – 3.33 (m, 1H), 2.83 – 2.73 (m, 1H), 2.56 – 2.41 (m, 2H),



1.78 – 1.61 (m, 2H) ppm.  $^{13}\text{C}$  NMR (101 MHz,  $\text{CDCl}_3$ )  $\delta$  155.17, 154.82, 140.97, 137.29, 129.39, 129.35, 128.55, 128.29, 127.73, 126.17, 88.22, 63.11, 41.76, 32.91, 28.52 ppm. IR (neat)  $\nu$  3297, 3062, 3028, 2926, 2857, 2120  $\text{cm}^{-1}$ ; HRMS (ESI)  $m/z$ : calcd. for  $\text{C}_{19}\text{H}_{19}\text{NO}_2\text{Na}^+$   $[\text{M}+\text{Na}]^+$ : 316.1308, Found: 316.1303. The enantiomeric excess was determined by HPLC on Chiralcel IA column, n-hexane : isopropanol = 95 : 5, flow rate = 1.0 mL/min, UV detection at  $\lambda = 214$  nm,  $t_{\text{R}} = 18.2$  min (minor),  $t_{\text{R}} = 12.8$  min (major).

## 2.4 The transformations of products<sup>2-4</sup>

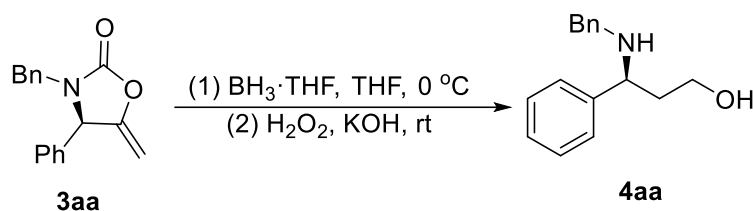

(*R*)-**3aa** (26.5 mg, 0.1 mmol),  $\text{BH}_3 \cdot \text{THF}$  (2.0 mL, 2 mmol), and anhydrous THF (2.0 mL) were added to a 10 mL Schlenk tube under a nitrogen atmosphere and reacted for 3 hours at 0°C until the reaction was complete, as confirmed by TLC. After cooling to room temperature, 1.0 mL of potassium hydroxide aqueous solution (2.0 M) and 1.0 mL of hydrogen peroxide were added. After stirring at room temperature for 30 minutes, the reaction was quenched by saturated  $\text{NH}_4\text{Cl}$  solution (10 mL), and organic materials were extracted with EA (15 mL $\times$ 3). The combined extracts were washed with brine and dried over anhydrous  $\text{Na}_2\text{SO}_4$ . The solvent was concentrated under reduced pressure and the residue was purified by column chromatography ( $\text{SiO}_2$ ) with n-hexane and ethyl acetate (5/1 - 1/1) as eluent to the compound **4aa** as a yellow oil (10.8mg, 45% yield, 90% *ee*).  $[\alpha]_{\text{D}}^{20} = -47.10$  (c 0.2,  $\text{CHCl}_3$ ).  $^1\text{H NMR}$  (400 MHz,  $\text{CDCl}_3$ )  $\delta$  7.41 – 7.35 (m, 2H), 7.33 – 7.28 (m, 5H), 7.27 – 7.22 (m, 3H), 3.89 (dd,  $J = 9.4, 3.6$  Hz, 1H), 3.80 – 3.75 (m, 2H), 3.71 (d,  $J = 12.9$  Hz, 1H), 3.56 (d,  $J = 12.9$  Hz, 1H), 3.36 (brs, 2H), 2.08 – 1.97 (m, 1H), 1.87 – 1.78 (m, 1H) ppm. HRMS (ESI)  $m/z$ : calcd. for  $\text{C}_{16}\text{H}_{20}\text{NO}^+$   $[\text{M}+\text{H}]^+$ : 242.1539, Found: 242.1539. The enantiomeric excess was determined by HPLC on Chiralcel AD-3 column, n-hexane : isopropanol = 70 : 30, flow rate = 0.5 mL/min, UV detection at  $\lambda = 214$  nm,  $t_{\text{R}} = 5.9$  min (minor),  $t_{\text{R}} = 6.3$  min (major).

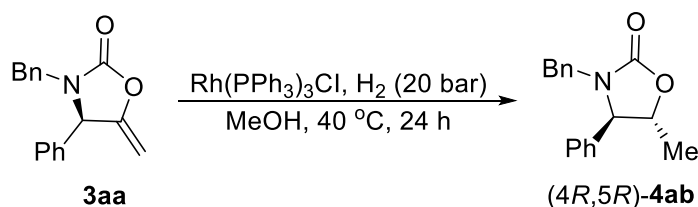

$\text{Rh}(\text{PPh}_3)_3\text{Cl}$  (4.6 mg, 0.005 mmol) and (*R*)-**3aa** (26.5 mg, 0.1 mmol) in 2 mL of anhydrous methanol was placed in an autoclave. The hydrogenation was performed at

room temperature under 20 bar of H<sub>2</sub> pressure for 3h. After concentration of the reaction mixture under reduced pressure, the residue was purified by silica gel chromatography (hexanes/AcOEt, 5/1) to afford (4*R*, 5*R*)-**4ab** (20.9 mg, 78% yield, 90% *ee*, >95:5 *dr*) as a yellow oil.  $[\alpha]_D^{20} = -72.00$  (c 0.2, CHCl<sub>3</sub>). <sup>1</sup>H NMR (400 MHz, CDCl<sub>3</sub>) δ 7.41 (d, *J* = 6.3 Hz, 3H), 7.32 – 7.28 (m, 3H), 7.17 – 7.07 (m, 4H), 4.96 (d, *J* = 14.8 Hz, 1H), 4.86 – 4.77 (m, 1H), 4.50 (d, *J* = 8.2 Hz, 1H), 3.66 (d, *J* = 14.7 Hz, 1H), 0.94 (d, *J* = 6.5 Hz, 3H). ppm. <sup>13</sup>C NMR (101 MHz, CDCl<sub>3</sub>) δ 158.48, 135.97, 134.30, 129.11, 129.02, 128.86, 128.59, 128.03, 74.56, 62.52, 46.35, 16.66 ppm. IR (neat) ν 3654, 3474, 3313, 3062, 3029, 2960, 2926, 2872, 2855, 2253, 1957, 1887 cm<sup>-1</sup>; HRMS (ESI) *m/z*: calcd. for C<sub>17</sub>H<sub>17</sub>NO<sub>2</sub>Na<sup>+</sup>[M+Na]<sup>+</sup>: 290.1152, Found: 290.1158. The enantiomeric excess was determined by HPLC on Chiralcel IA column, n-hexane : isopropanol = 95 : 5, flow rate = 1.0 mL/min, UV detection at λ = 214 nm, *t<sub>R</sub>* = 19.8 min (minor), *t<sub>R</sub>* = 16.6 min (major).

### 3. X-ray Crystallographic Data for the **3ah**

Crystals suitable for X-ray single-crystal diffraction analysis was obtained through slowly evaporating the mixture solution of DCM and n-hexane at room temperature. CIF file for the product **3ah** has been deposited at the Cambridge Crystallographic Data Centre with deposition number 2356244. Copies of these data can be obtained, free of charge, on application to the CCDC, 12 Union Road, Cambridge CB2 1EZ, UK [fax: +44(1223)336033; e-mail: [deposit@ccdc.cam.ac.uk](mailto:deposit@ccdc.cam.ac.uk)].

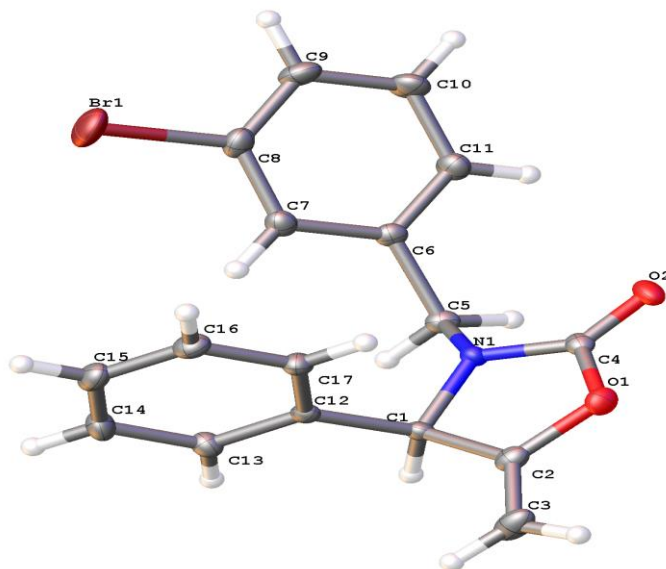

**Table 4.** Crystal data and structure refinement

|                                   |                                                     |          |
|-----------------------------------|-----------------------------------------------------|----------|
| Identification code               | <b>3ah</b>                                          |          |
| Empirical formula                 | C <sub>17</sub> H <sub>14</sub> Br N O <sub>2</sub> |          |
| Formula weight                    | 344.20                                              |          |
| Temperature                       | 170.00 K                                            |          |
| Wavelength                        | 1.34139 Å                                           |          |
| Crystal system                    | Monoclinic                                          |          |
| Space group                       | C 1 2 1                                             |          |
| Unit cell dimensions              | a = 33.0990(7) Å                                    | α = 90°. |
|                                   | b = 5.83420(10) Å                                   | β =      |
|                                   | c = 7.8722(2) Å                                     | γ = 90°. |
| Volume                            | 1519.62(6) Å <sup>3</sup>                           |          |
| Z                                 | 4                                                   |          |
| Density (calculated)              | 1.504 Mg/m <sup>3</sup>                             |          |
| Absorption coefficient            | 2.452 mm <sup>-1</sup>                              |          |
| F(000)                            | 696                                                 |          |
| Crystal size                      | 0.17 x 0.17 x 0.05 mm <sup>3</sup>                  |          |
| Theta range for data collection   | 4.651 to 54.900°.                                   |          |
| Index ranges                      | -40 ≤ h ≤ 40, -6 ≤ k ≤ 7, -9 ≤ l ≤ 9                |          |
| Reflections collected             | 8082                                                |          |
| Independent reflections           | 2603 [R(int) = 0.0423]                              |          |
| Completeness to theta = 53.594°   | 99.2 %                                              |          |
| Absorption correction             | Semi-empirical from equivalents                     |          |
| Max. and min. transmission        | 0.7508 and 0.5475                                   |          |
| Refinement method                 | Full-matrix least-squares on F <sup>2</sup>         |          |
| Data / restraints / parameters    | 2603 / 1 / 190                                      |          |
| Goodness-of-fit on F <sup>2</sup> | 1.089                                               |          |
| Final R indices [I > 2σ(I)]       | R1 = 0.0278, wR2 = 0.0770                           |          |
| R indices (all data)              | R1 = 0.0299, wR2 = 0.0804                           |          |
| Absolute structure parameter      | -0.016(15)                                          |          |
| Extinction coefficient            | n/a                                                 |          |
| Largest diff. peak and hole       | 0.243 and -0.397 e.Å <sup>-3</sup>                  |          |

#### 4. References

- [1] Q. L. Cai, H. Q. Rao, S. J. Li, Y. Lan, K. L. Ding and X. M. Wang, Well-defined chiral dinuclear copper complexes in enantioselective propargylic substitution: For a long-standing supposition on binuclear mechanism, *Chem*, 2024, **10**, 265 – 282.
- [2] M. P. Sibi, Mei Liu, Enantioselective Conjugate Addition of Hydroxylamines to Pyrazolidinone Acrylamides, *Org. Lett.*, 2001, **3**, 4181 – 4184.
- [3] L. Shao, Y. H. Wang, D. Y. Zhang, J. Xu, and X. P. Hu, Desilylation-Activated Propargylic Transformation: Enantioselective Copper-Catalyzed [3+2] Cycloaddition of Propargylic Esters with  $\beta$ -Naphthol or Phenol Derivatives, *Angew. Chem. Int. Ed.*, 2016, **55**, 5014 – 5018.
- [4] C. Miniejew, F. Outurquin and X. Pannecoucke, New phenylselanyl group activation: synthesis of aziridines and oxazolidin-2-ones, *Org. Biomol. Chem.* 2004, **2**, 1575 – 1576.

## 5. Copies of NMR Spectra

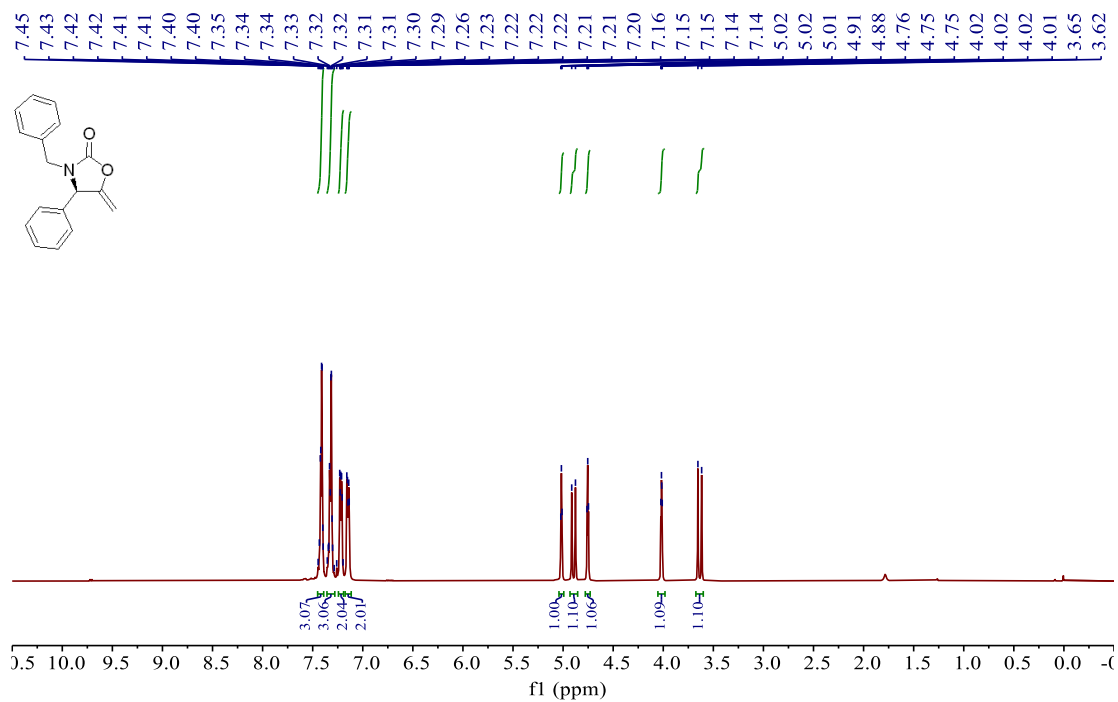

**<sup>1</sup>H NMR spectra (400 MHz, CDCl<sub>3</sub>) of **3aa****

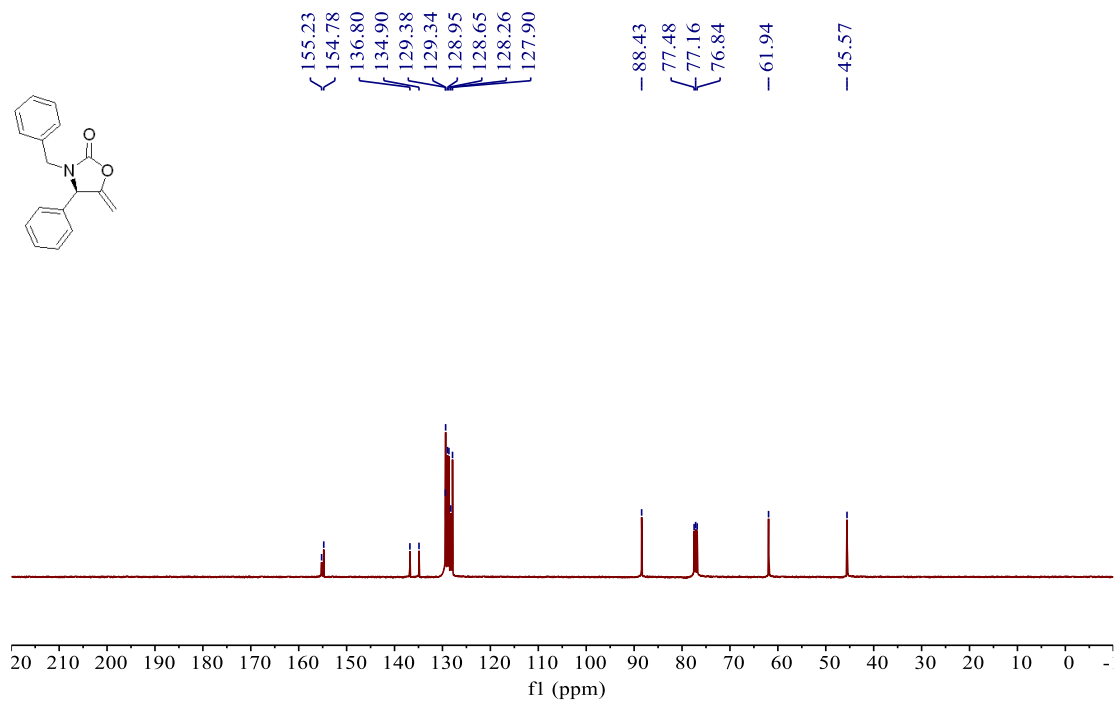

**<sup>13</sup>C NMR spectra (101 MHz, CDCl<sub>3</sub>) of **3aa****

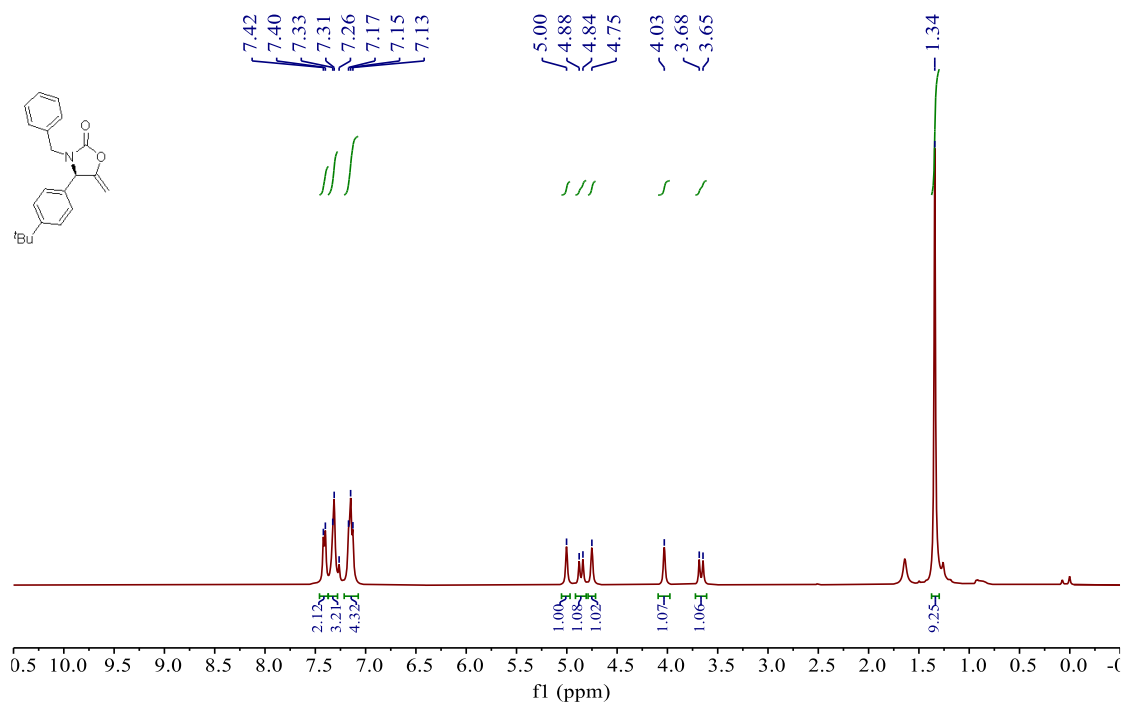

<sup>1</sup>H NMR spectra (400 MHz, CDCl<sub>3</sub>) of **3ba**

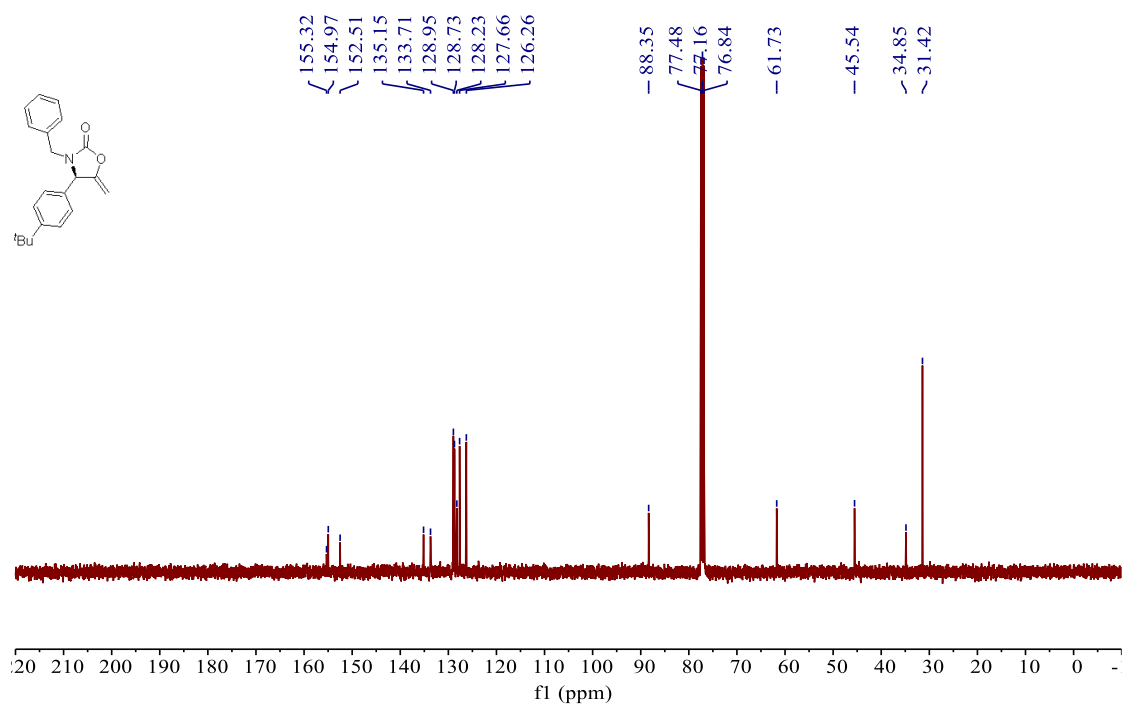

<sup>13</sup>C NMR spectra (101 MHz, CDCl<sub>3</sub>) of **3ba**

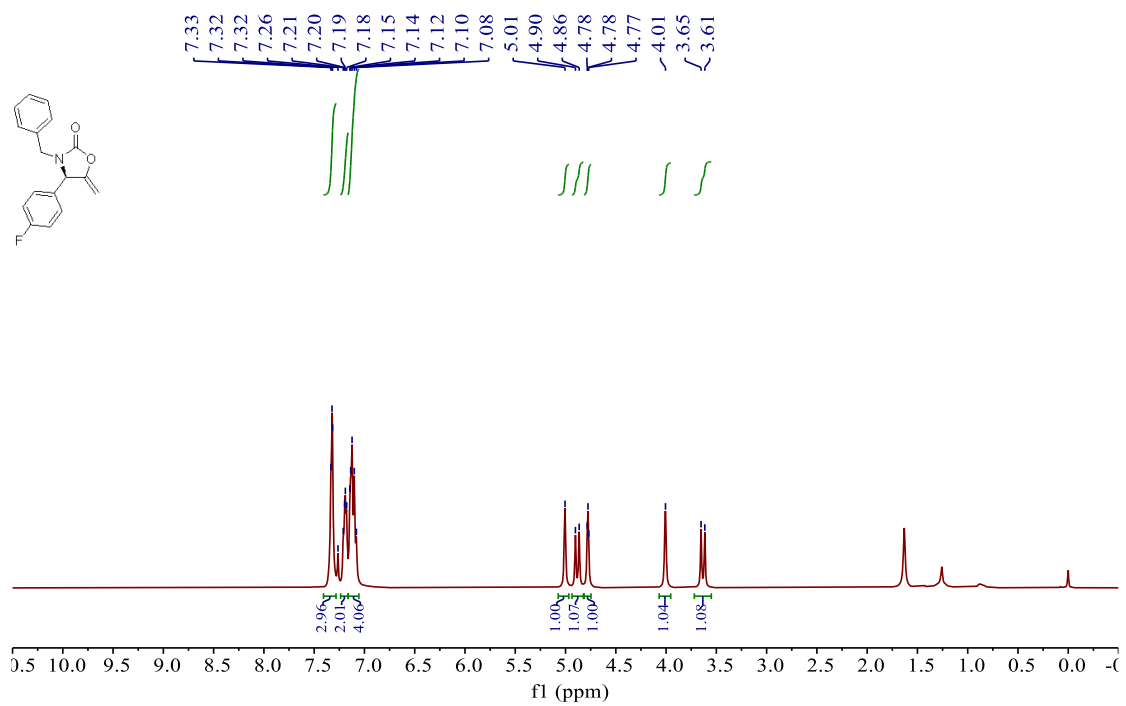

**<sup>1</sup>H NMR spectra (400 MHz, CDCl<sub>3</sub>) of 3ca**

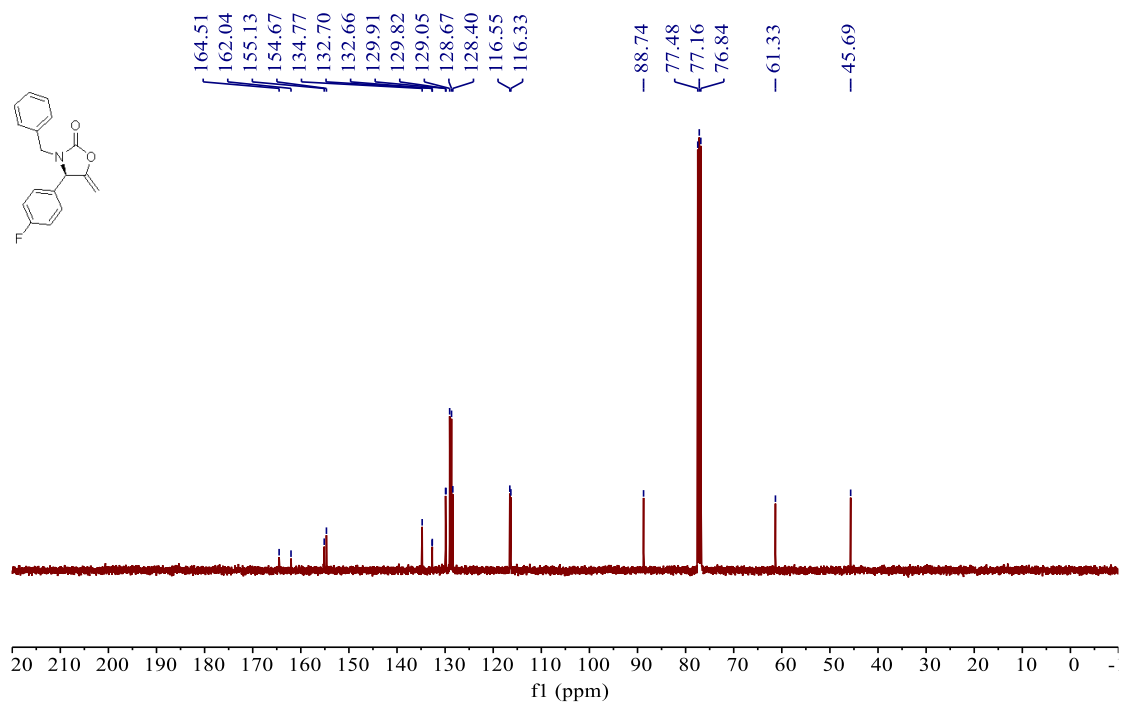

**<sup>13</sup>C NMR spectra (101 MHz, CDCl<sub>3</sub>) of 3ca**



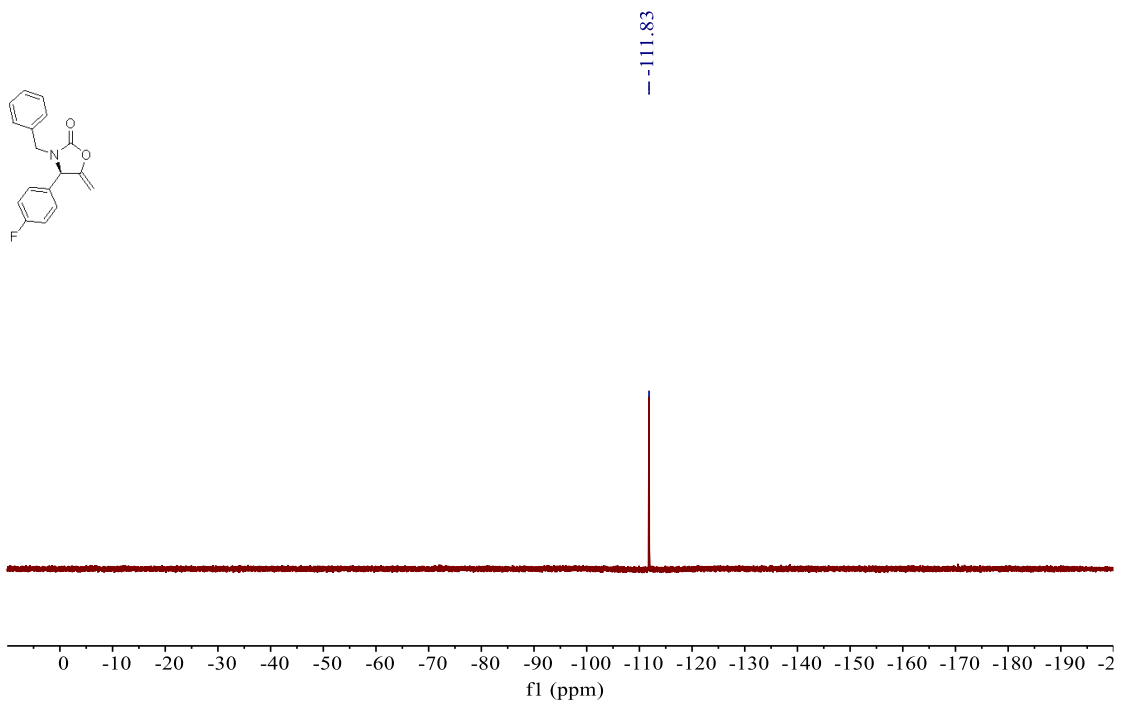

$^{19}\text{F}$  NMR spectra (376 MHz,  $\text{CDCl}_3$ ) of 3ca

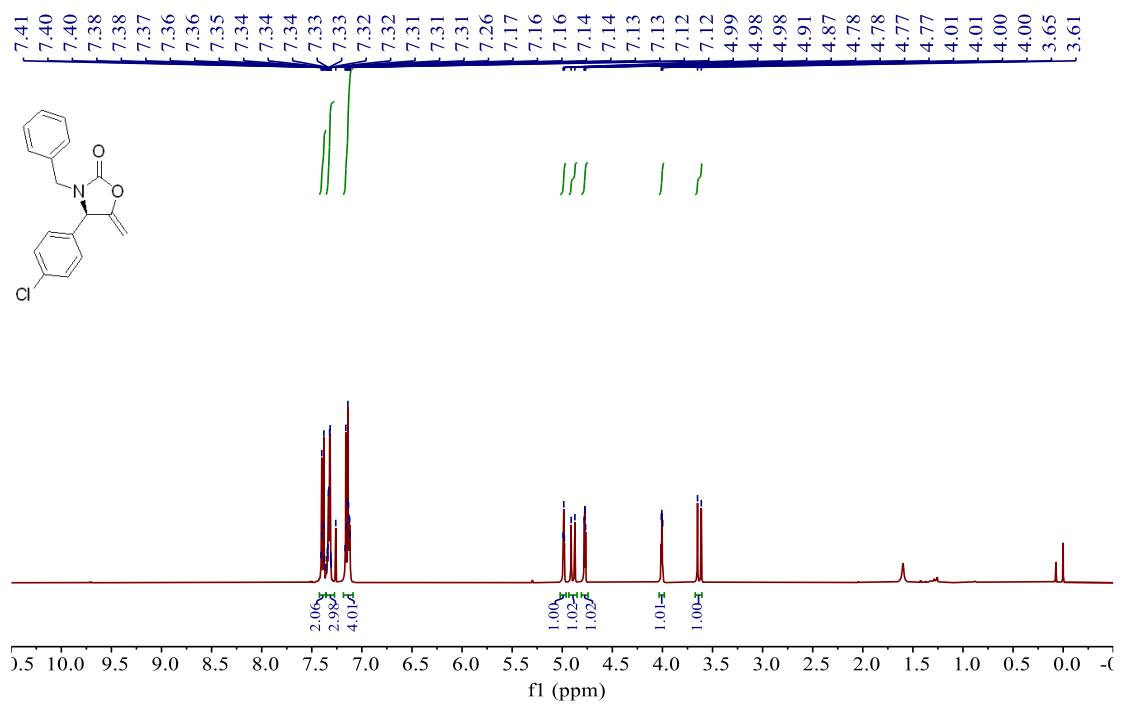

$^1\text{H}$  NMR spectra (400 MHz,  $\text{CDCl}_3$ ) of 3da

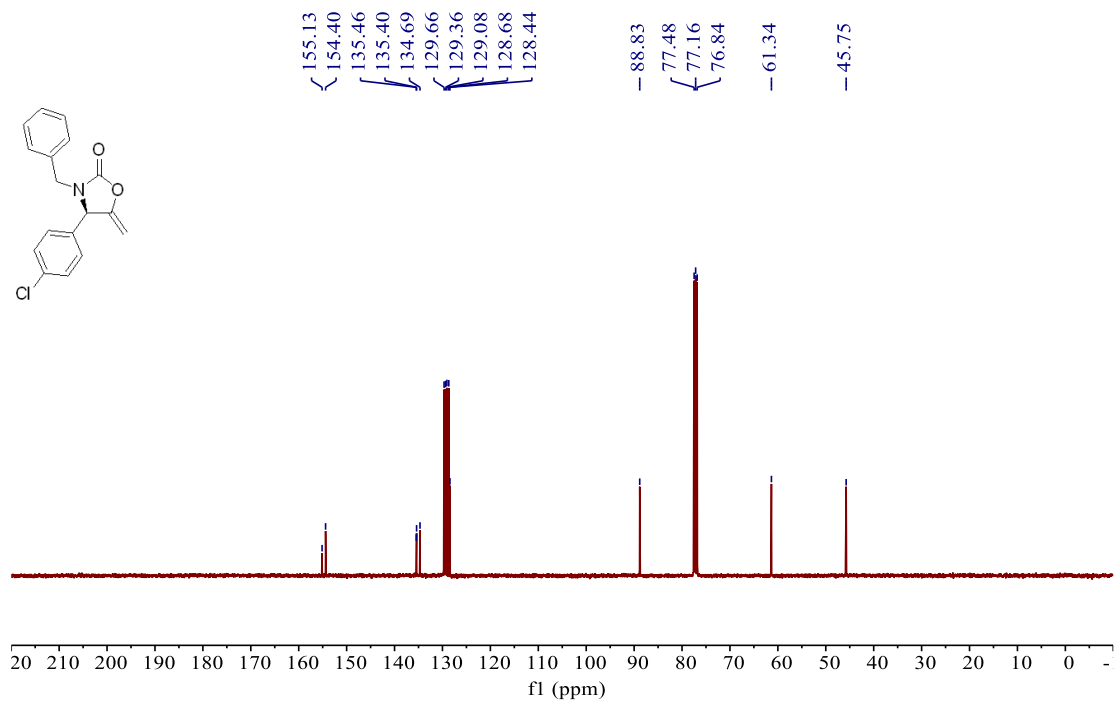

<sup>13</sup>C NMR spectra (101 MHz, CDCl<sub>3</sub>) of **3da**

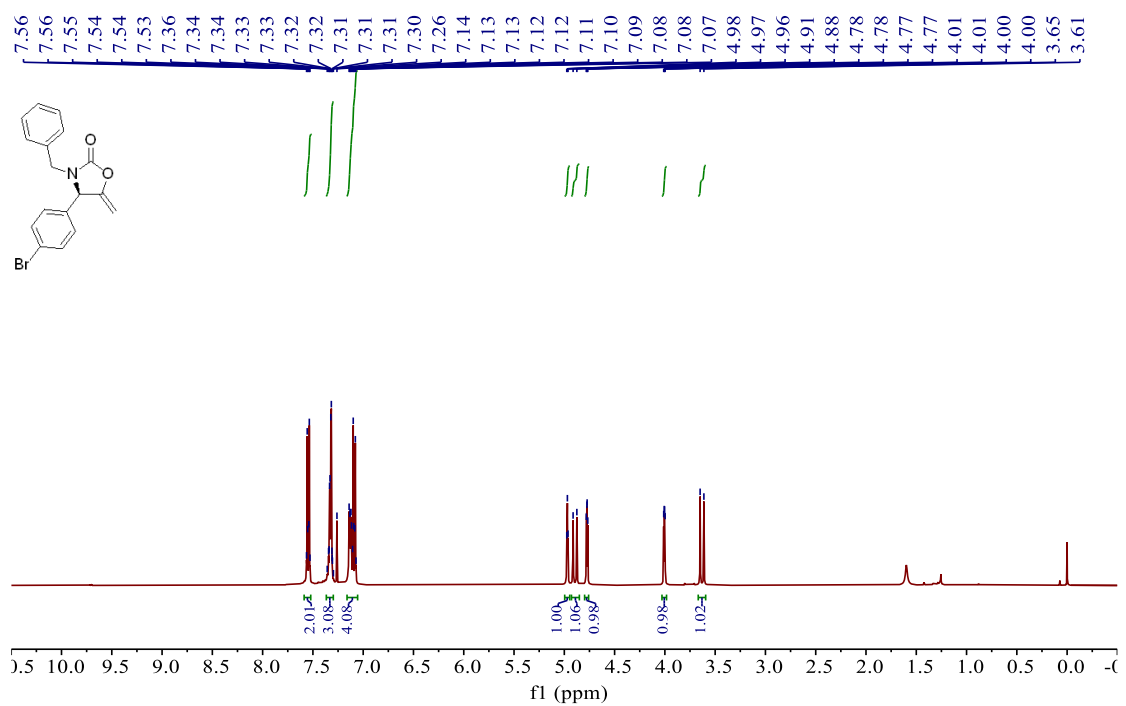

<sup>1</sup>H NMR spectra (400 MHz, CDCl<sub>3</sub>) of **3ea**

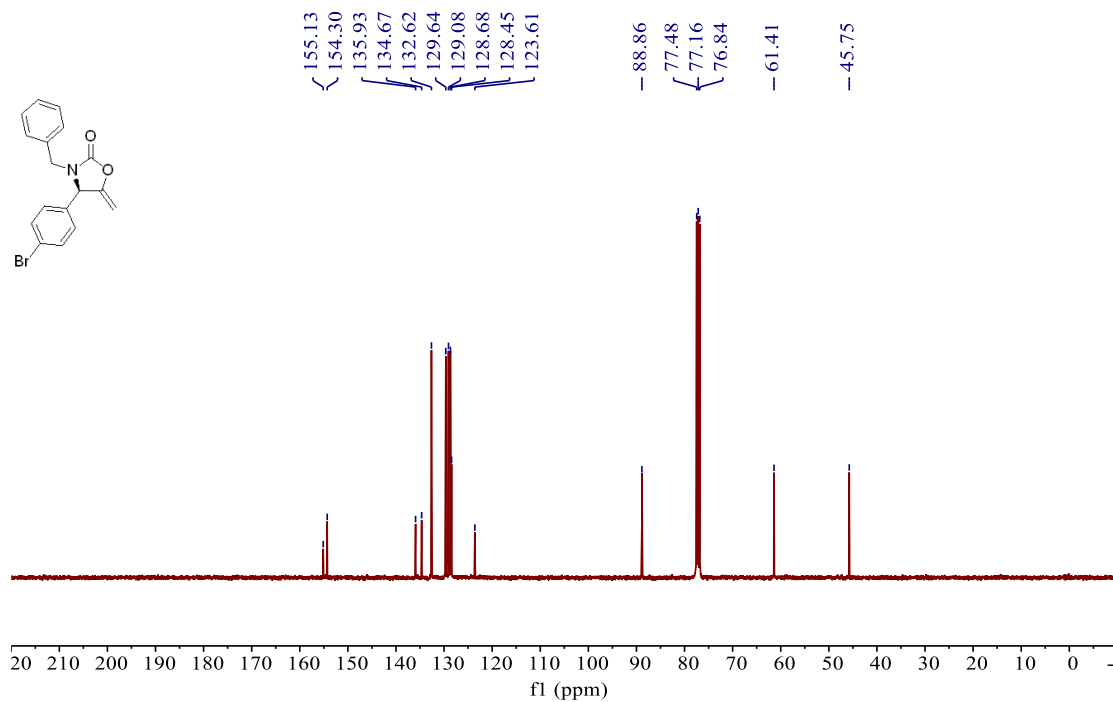

**<sup>13</sup>C NMR spectra (101 MHz, CDCl<sub>3</sub>) of 3ea**

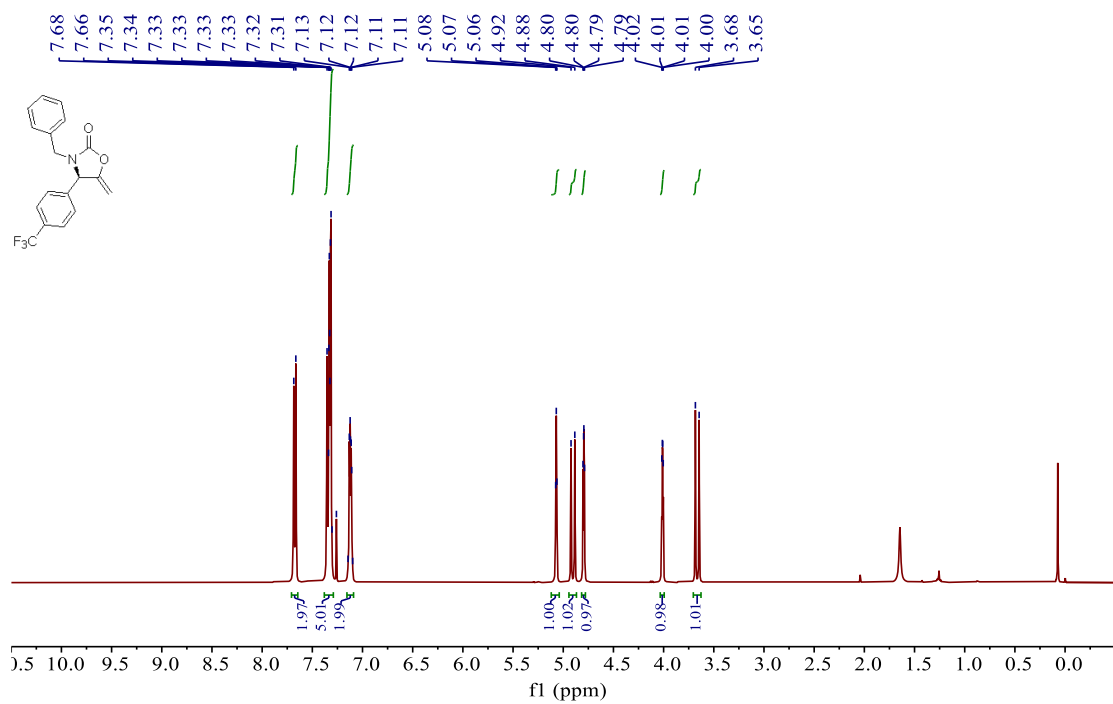

**<sup>1</sup>H NMR spectra (400 MHz, CDCl<sub>3</sub>) of 3fa**

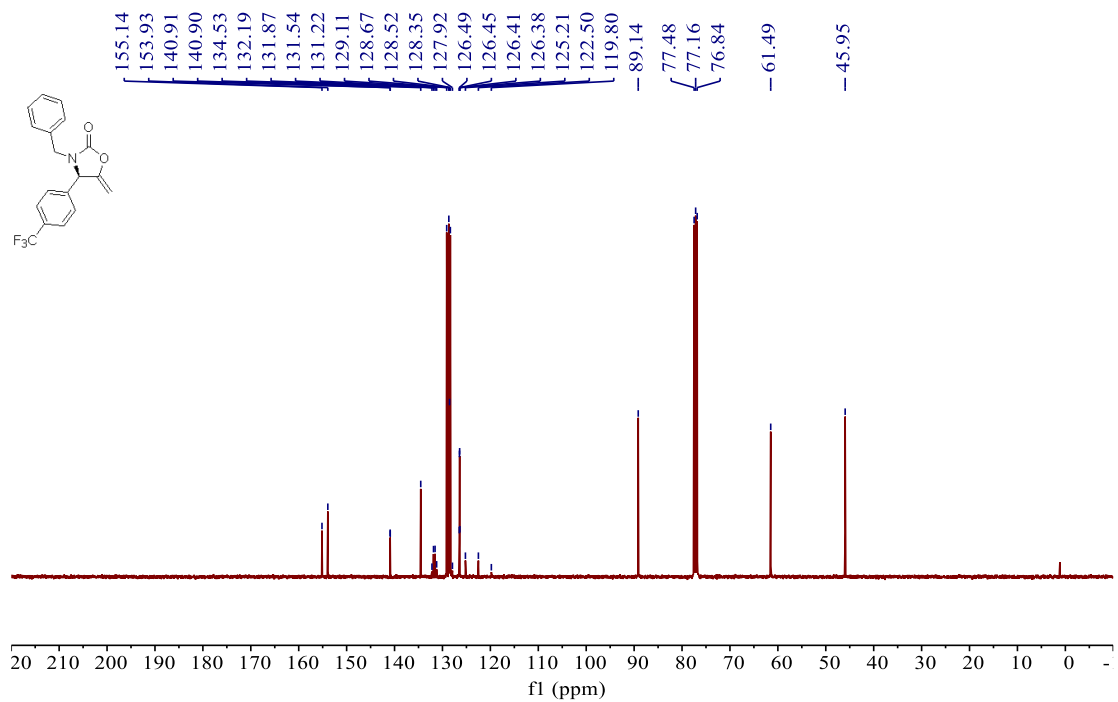

<sup>13</sup>C NMR spectra (101 MHz, CDCl<sub>3</sub>) of **3fa**

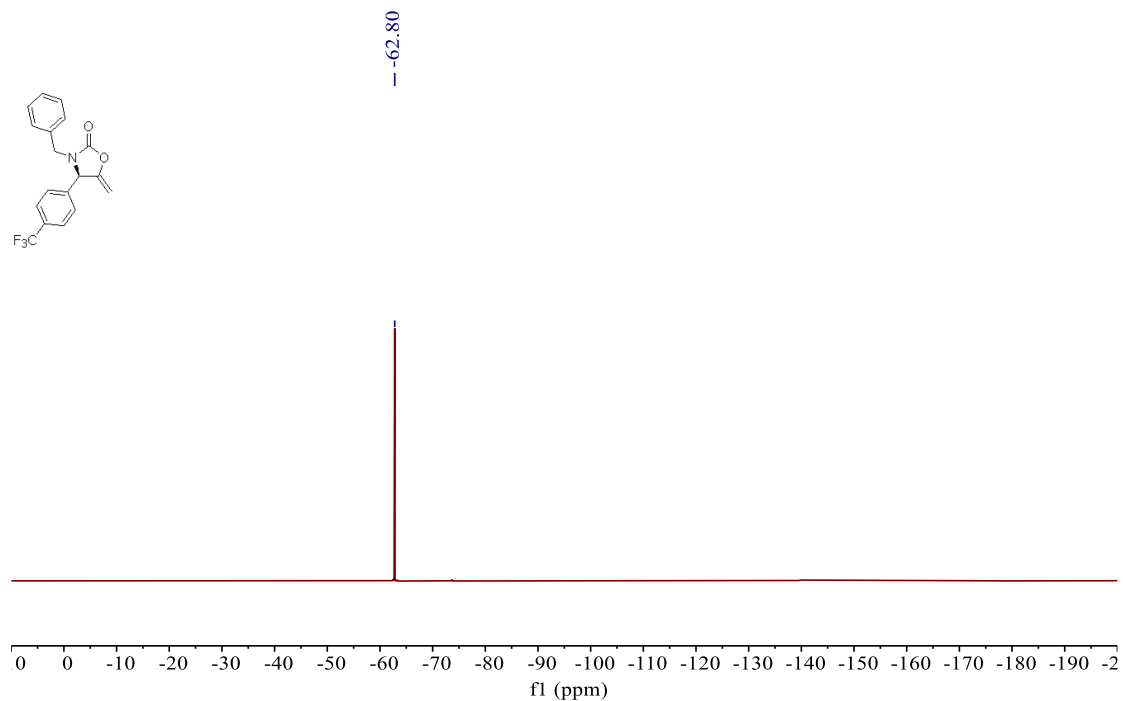

<sup>19</sup>F NMR spectra (376 MHz, CDCl<sub>3</sub>) of **3fa**

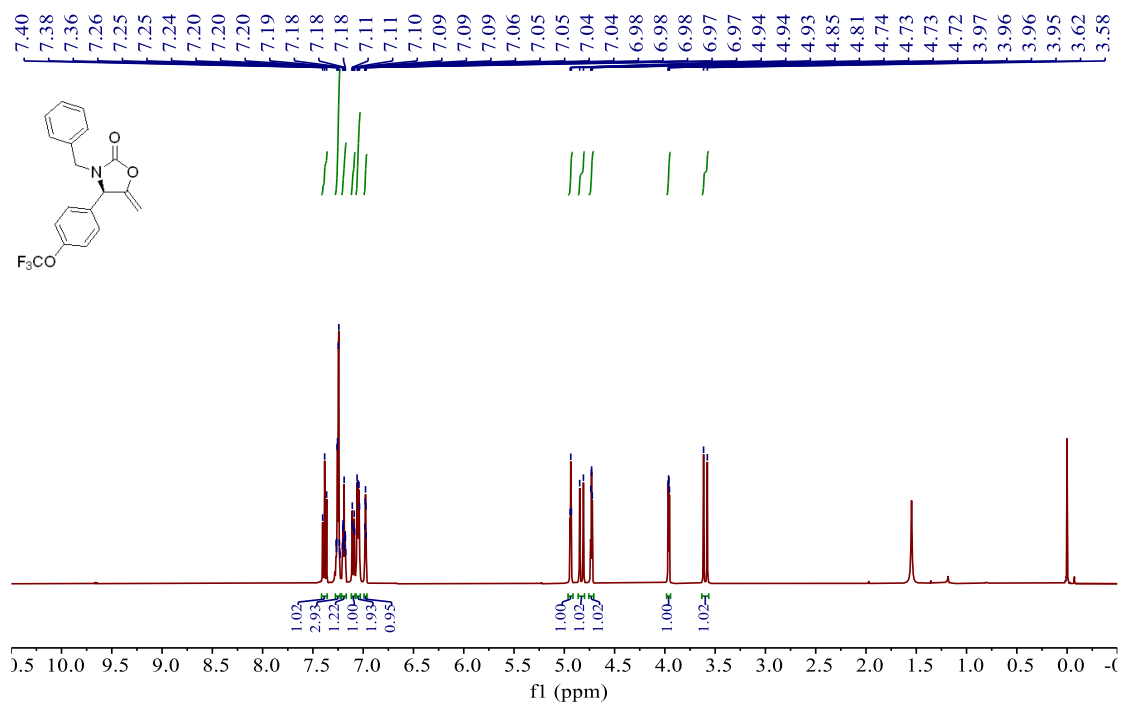

**<sup>1</sup>H NMR spectra (400 MHz, CDCl<sub>3</sub>) of 3ga**

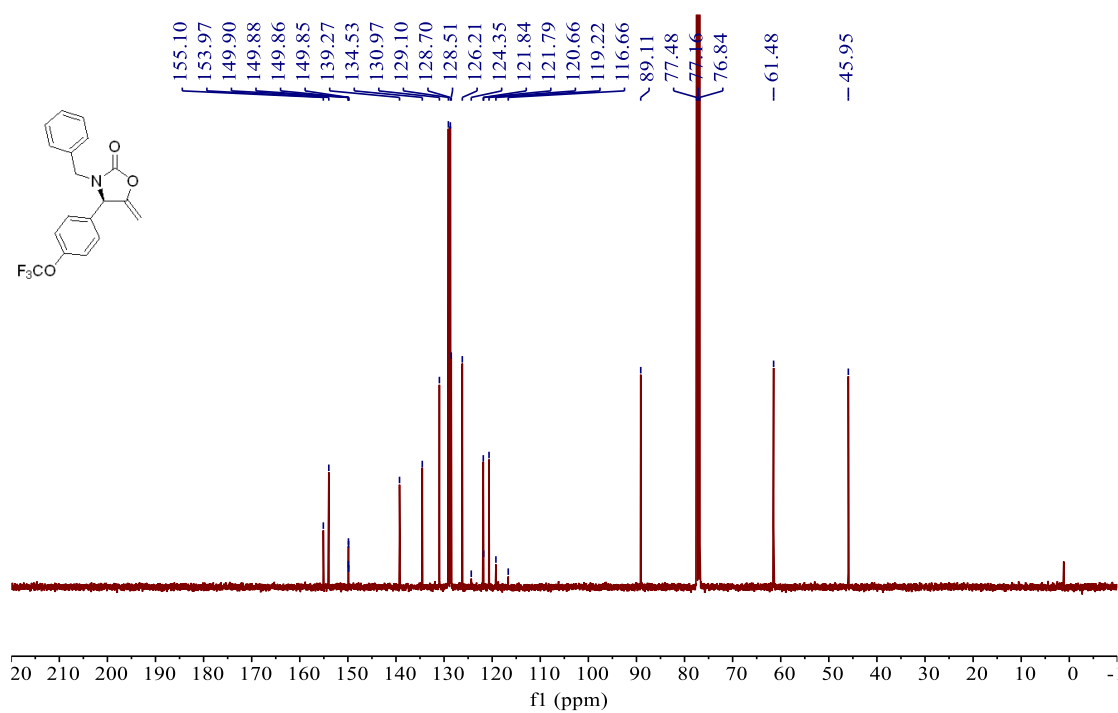

**<sup>13</sup>C NMR spectra (101 MHz, CDCl<sub>3</sub>) of 3ga**

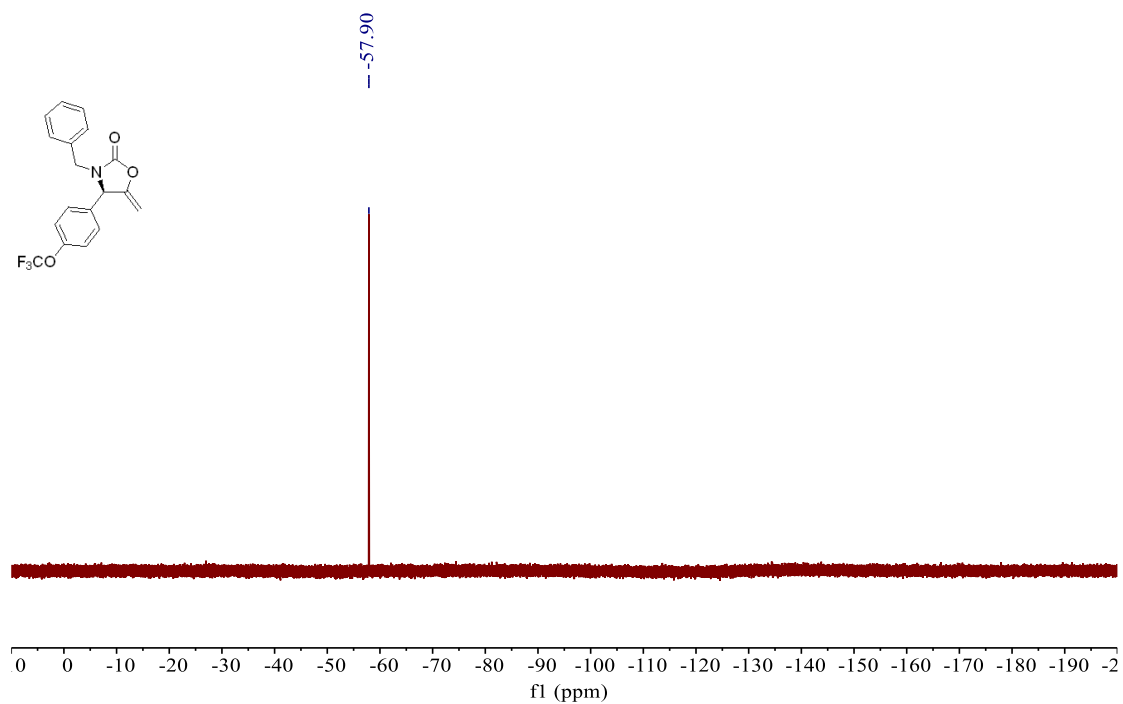

$^{19}\text{F}$  NMR spectra (376 MHz,  $\text{CDCl}_3$ ) of 3ga

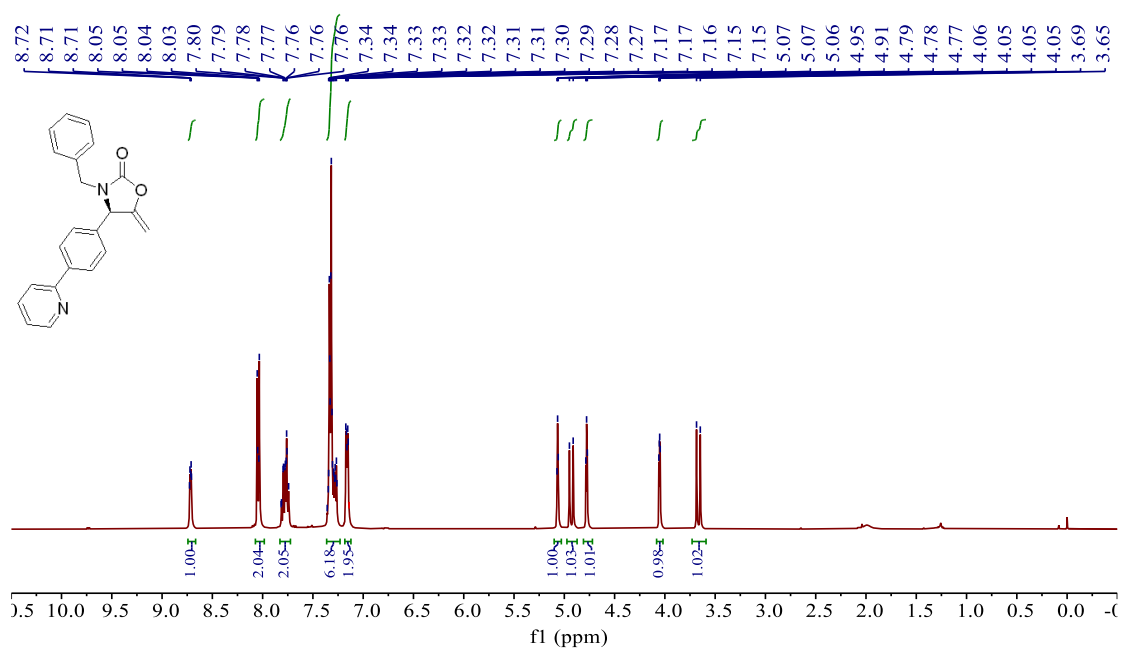

$^1\text{H}$  NMR spectra (400 MHz,  $\text{CDCl}_3$ ) of 3ha

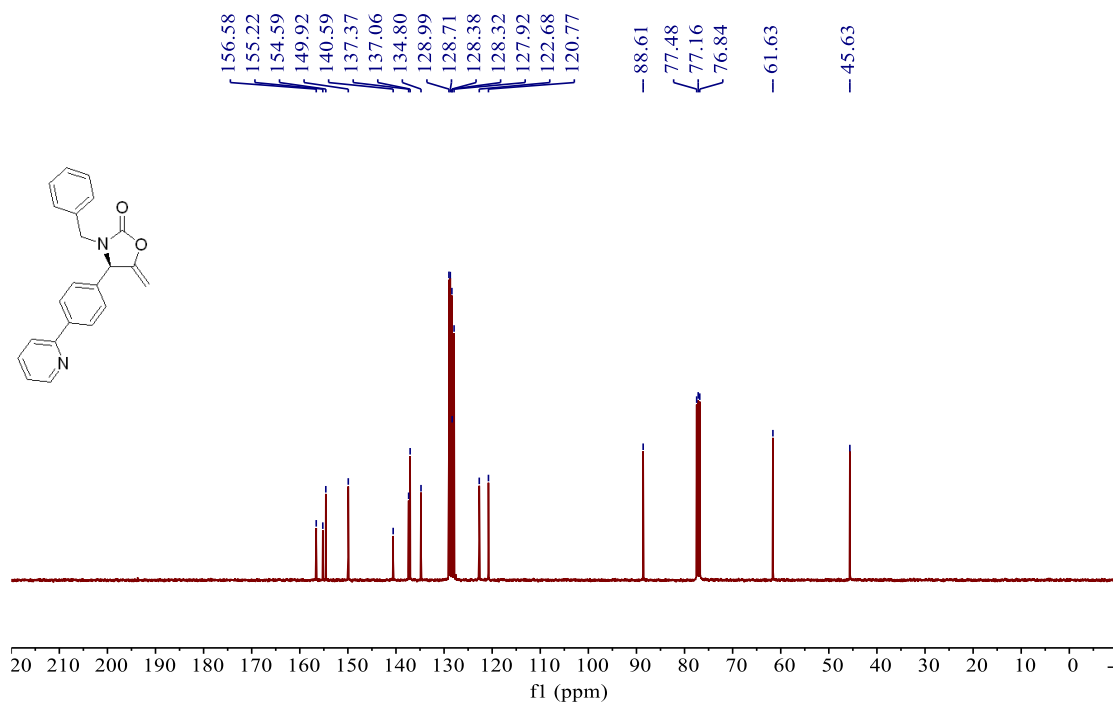

<sup>13</sup>C NMR spectra (101 MHz, CDCl<sub>3</sub>) of **3ha**

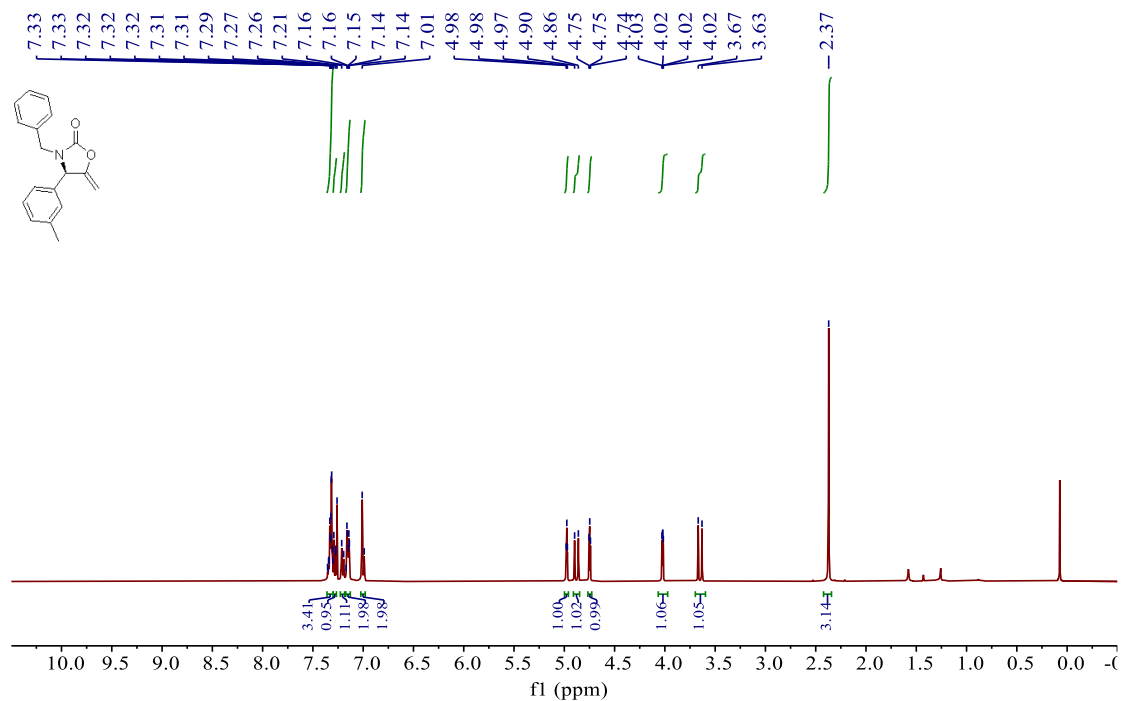

<sup>1</sup>H NMR spectra (400 MHz, CDCl<sub>3</sub>) of **3ia**

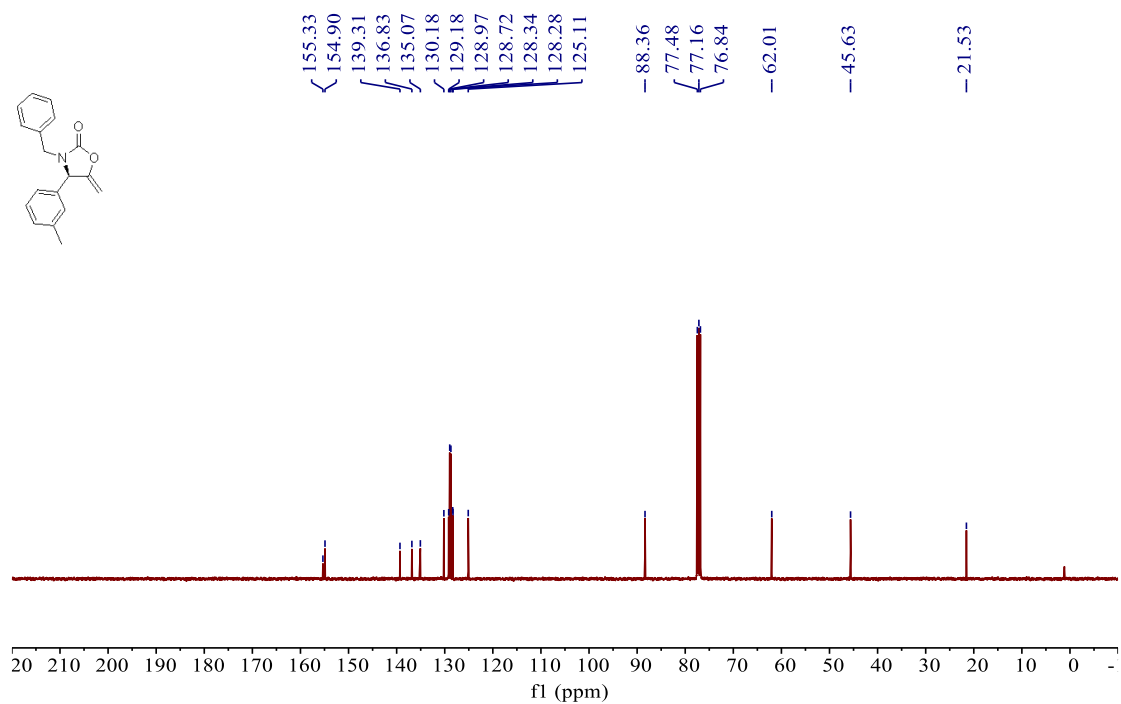

<sup>13</sup>C NMR spectra (101 MHz, CDCl<sub>3</sub>) of **3ia**

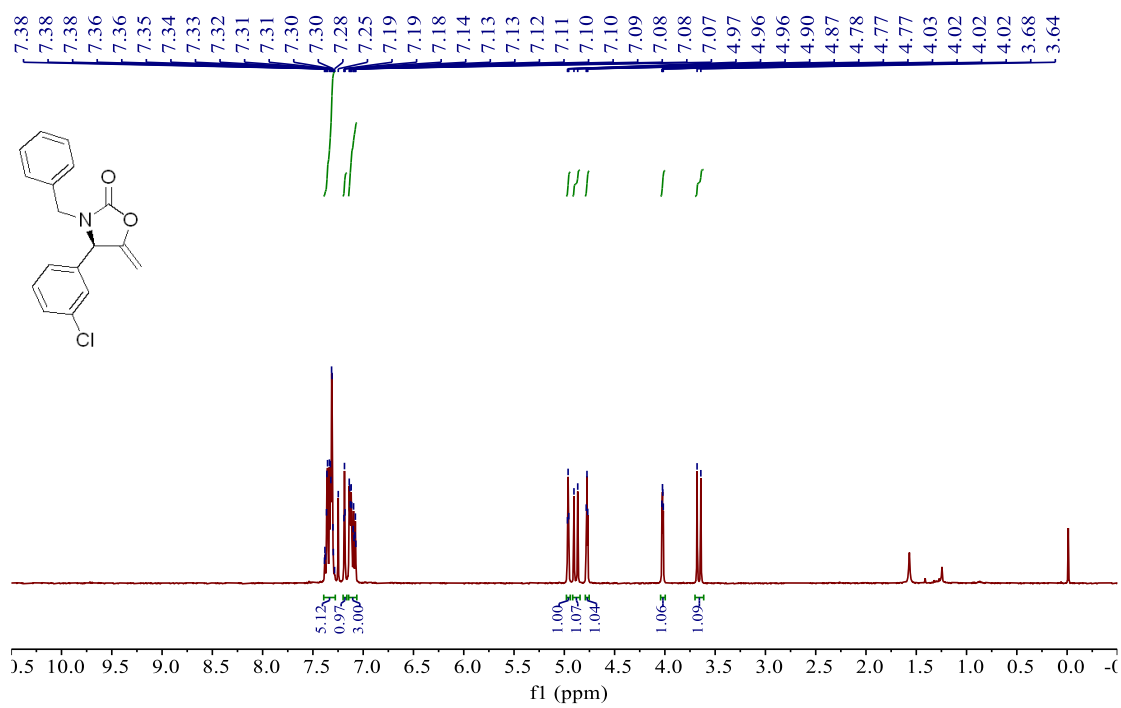

<sup>1</sup>H NMR spectra (400 MHz, CDCl<sub>3</sub>) of **3ja**



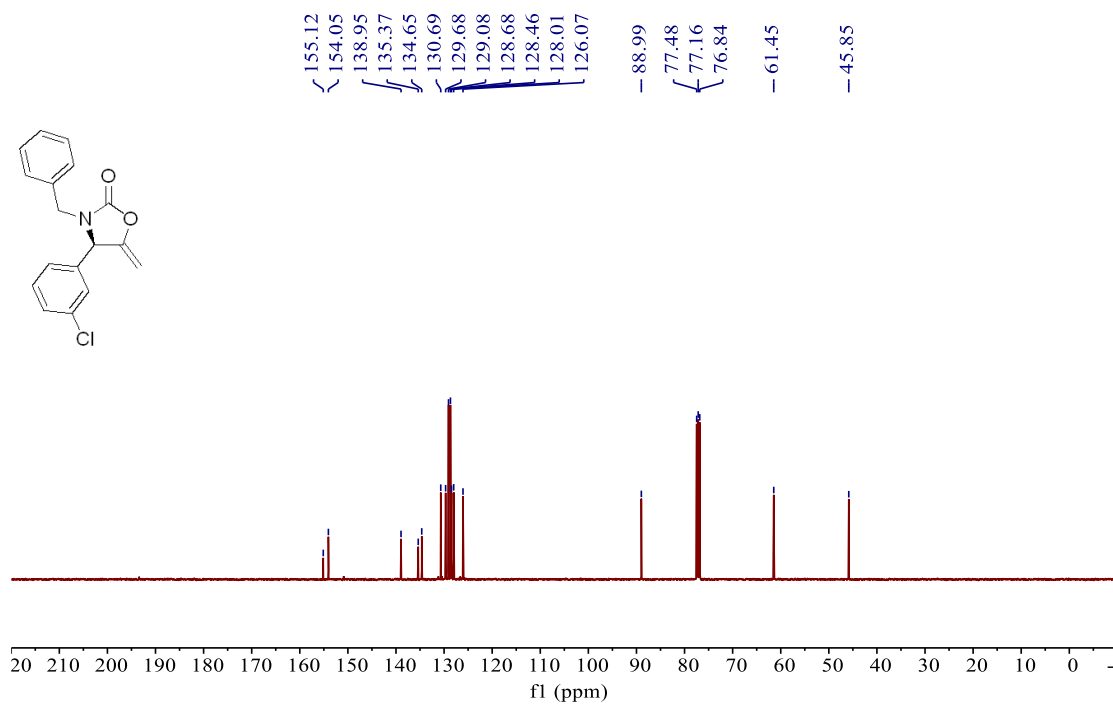

<sup>13</sup>C NMR spectra (101 MHz, CDCl<sub>3</sub>) of **3ja**

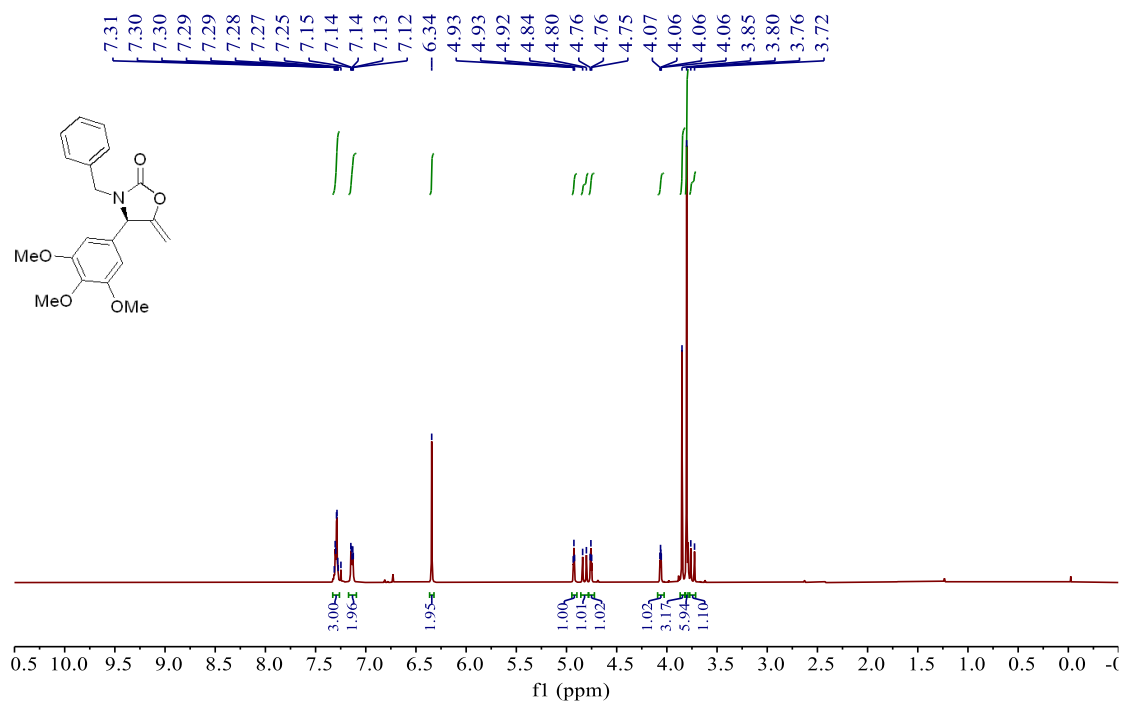

<sup>1</sup>H NMR spectra (400 MHz, CDCl<sub>3</sub>) of **3ka**

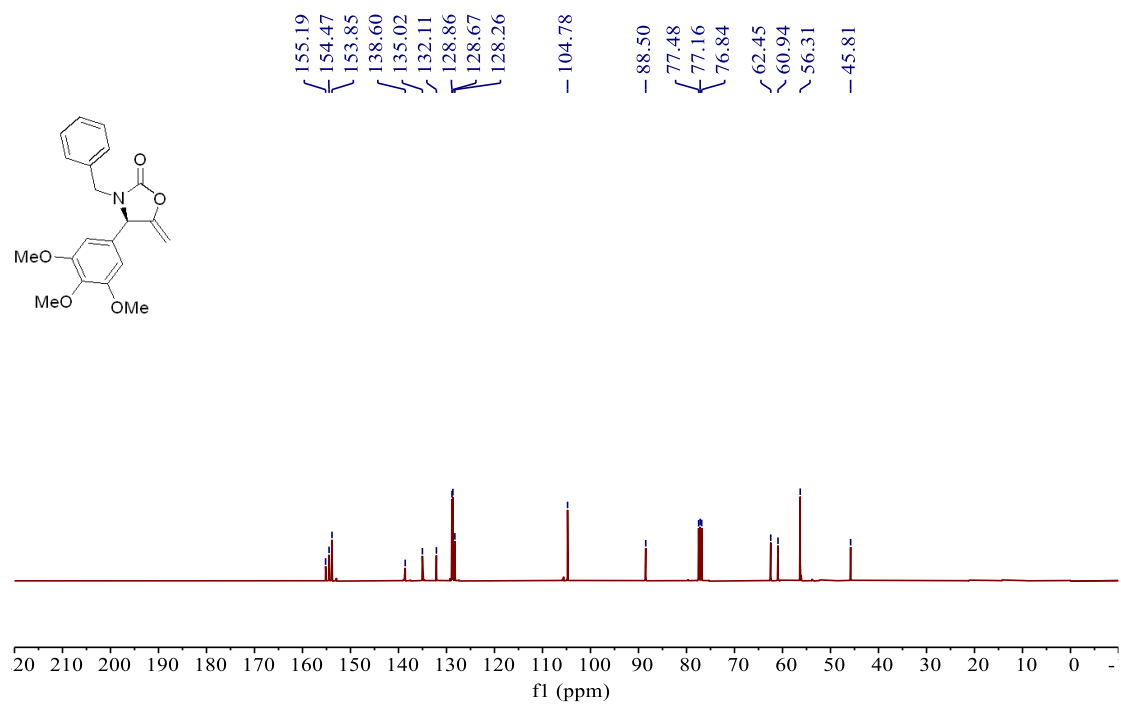

$^{13}\text{C}$  NMR spectra (101 MHz,  $\text{CDCl}_3$ ) of **3ka**

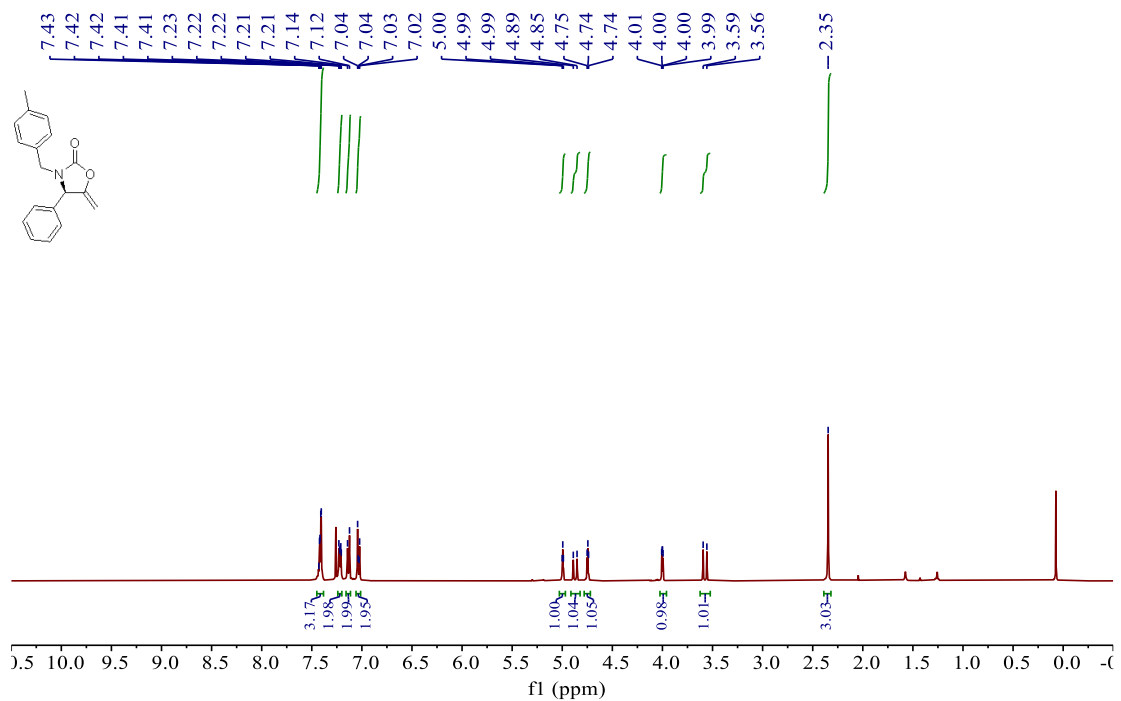

$^1\text{H}$  NMR spectra (400 MHz,  $\text{CDCl}_3$ ) of **3ab**

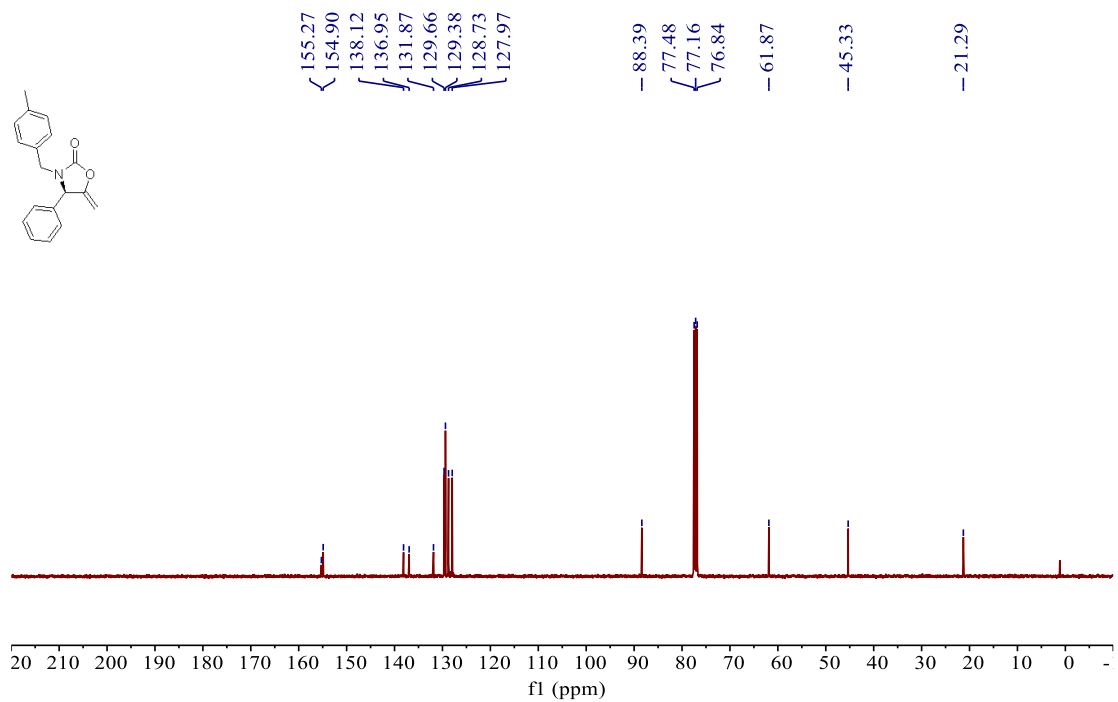

<sup>13</sup>C NMR spectra (101 MHz, CDCl<sub>3</sub>) of **3ab**

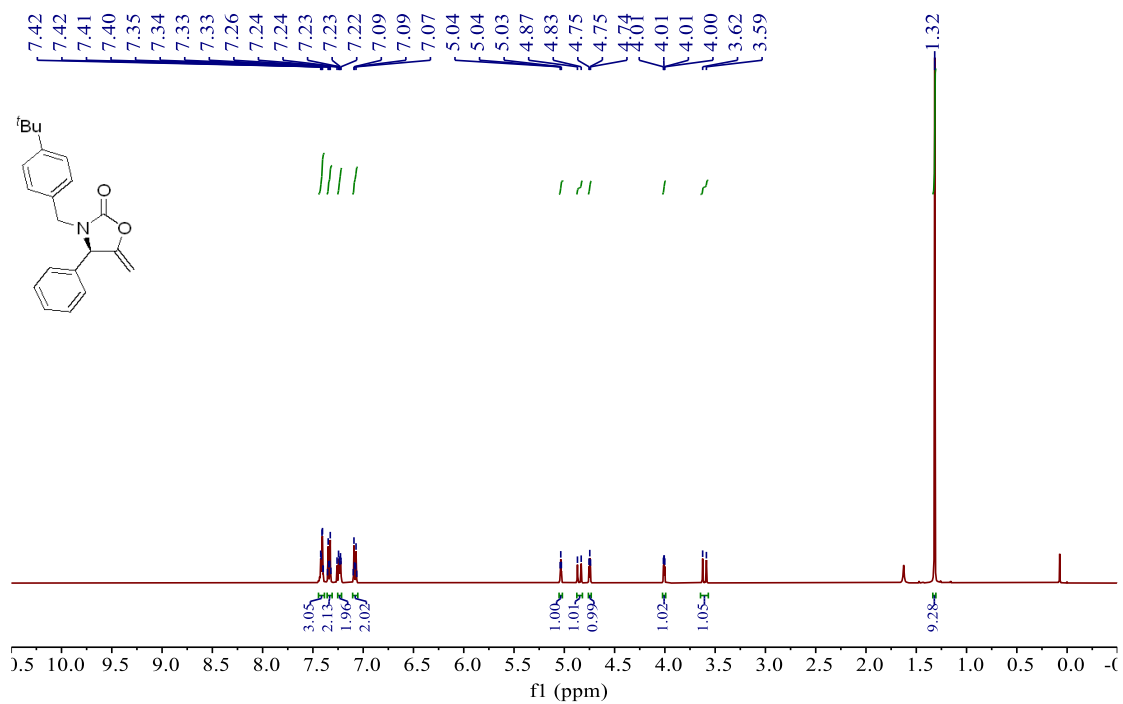

<sup>1</sup>H NMR spectra (400 MHz, CDCl<sub>3</sub>) of **3ac**

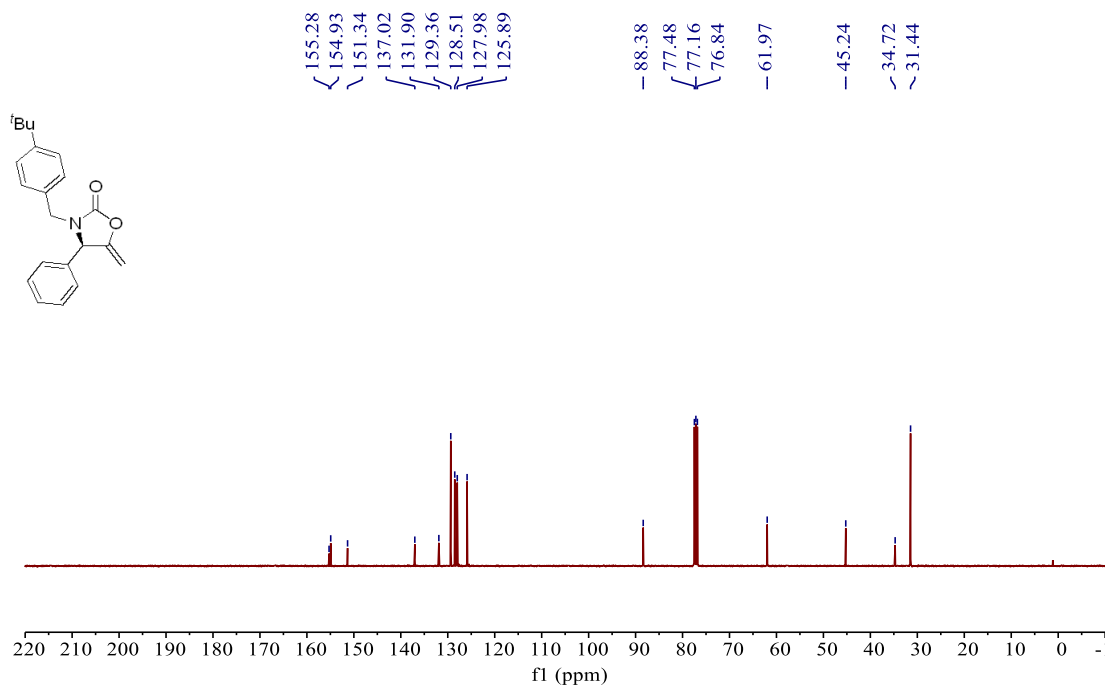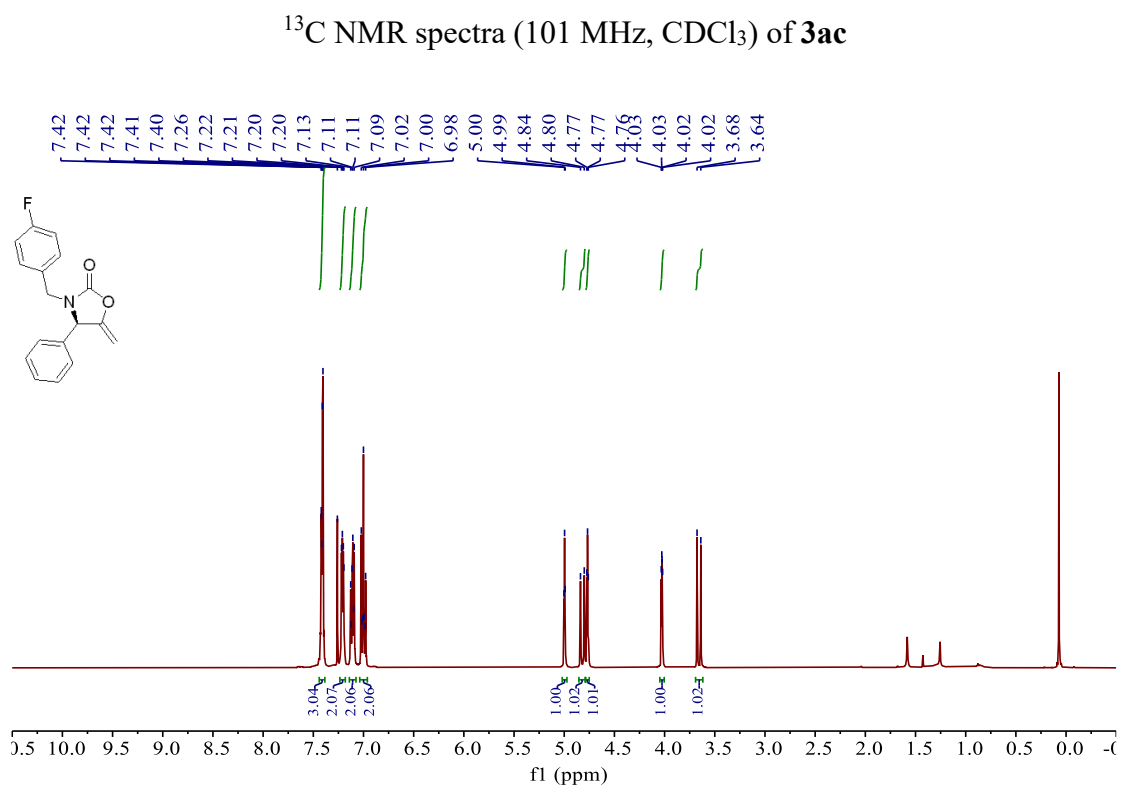

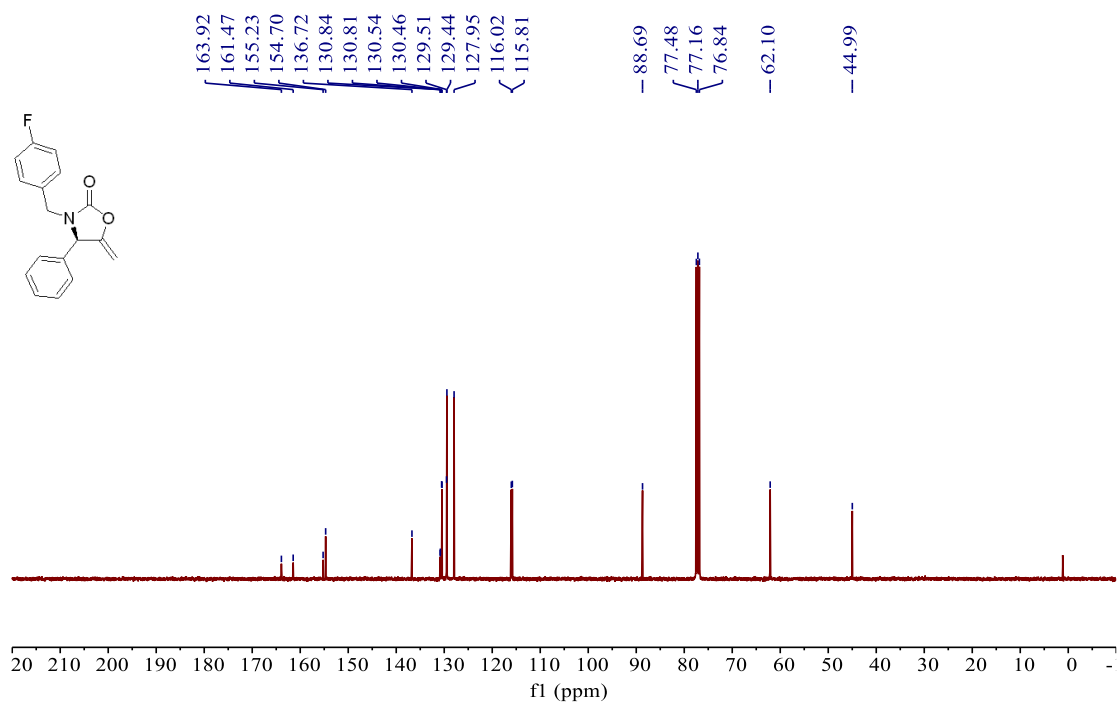

<sup>13</sup>C NMR spectra (101 MHz, CDCl<sub>3</sub>) of **3ad**

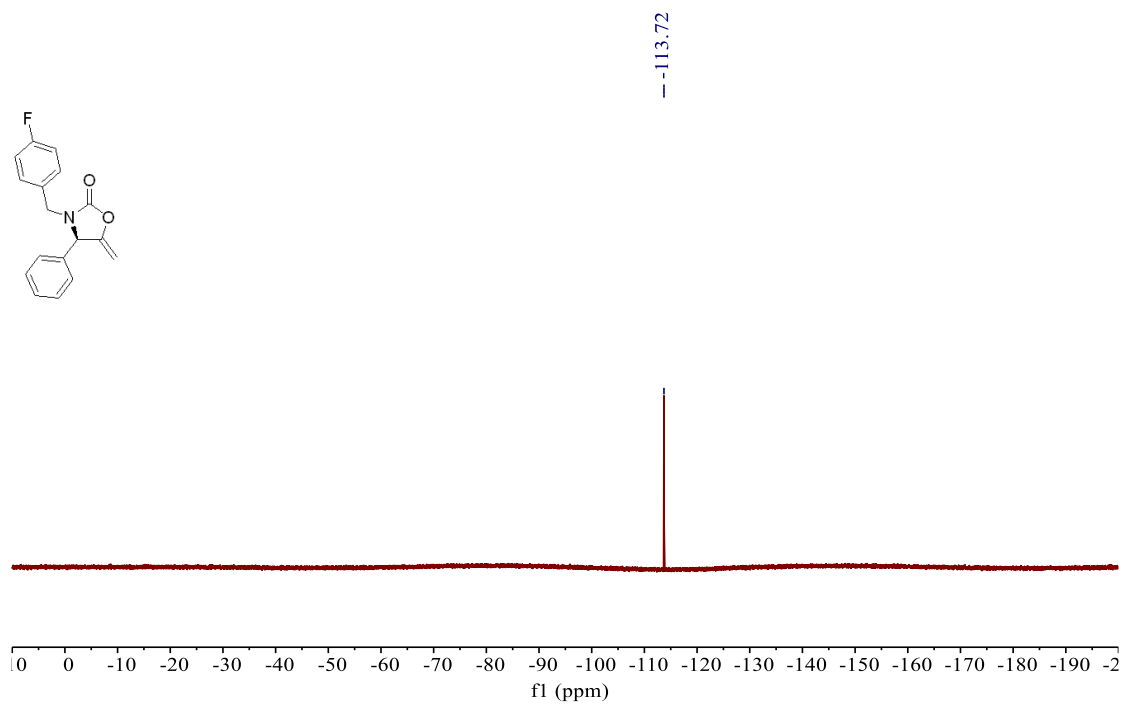

<sup>19</sup>F NMR spectra (376 MHz, CDCl<sub>3</sub>) of **3ad**

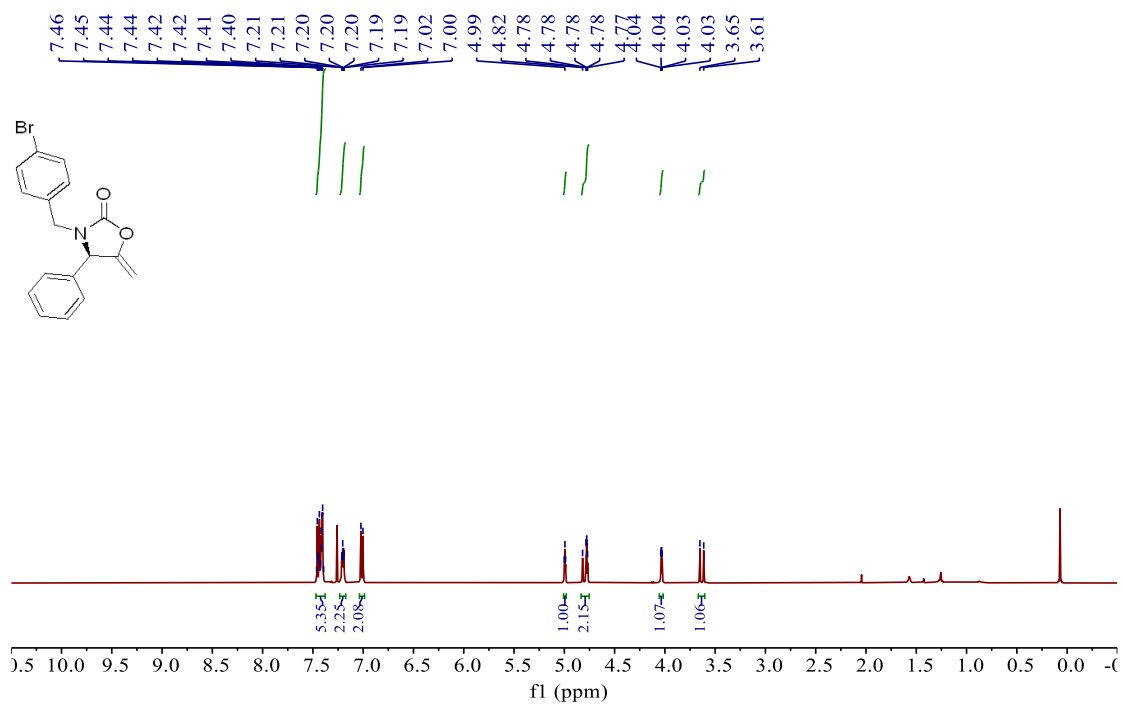

<sup>1</sup>H NMR spectra (400 MHz, CDCl<sub>3</sub>) of 3ae

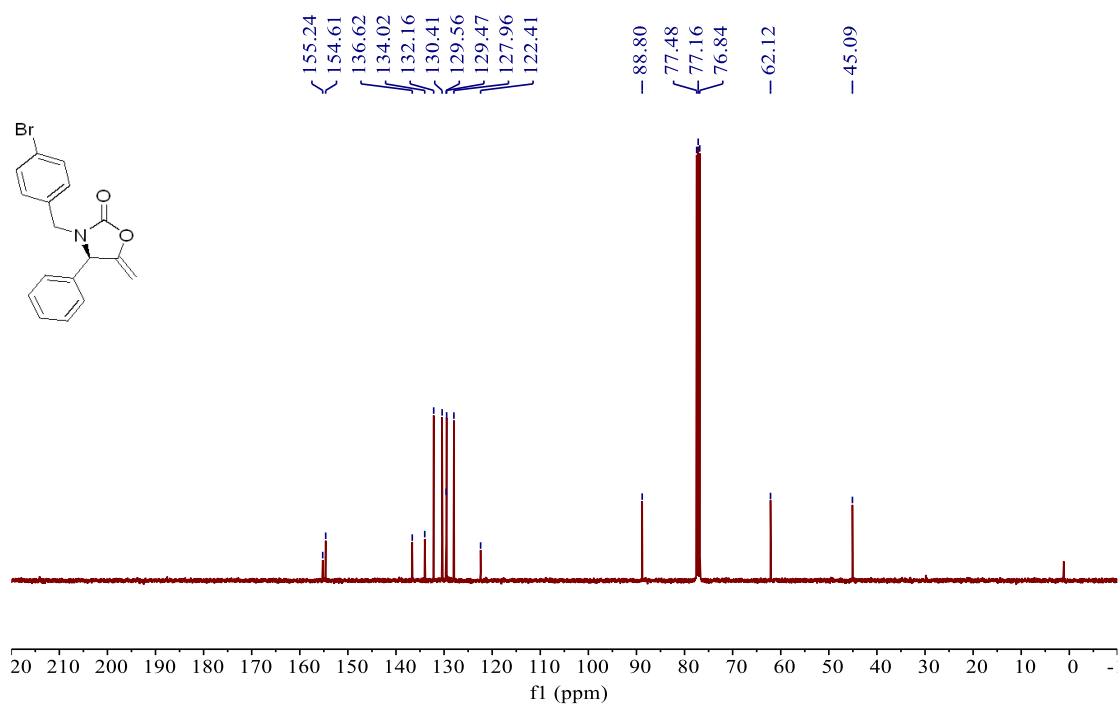

<sup>13</sup>C NMR spectra (101 MHz, CDCl<sub>3</sub>) of 3ae

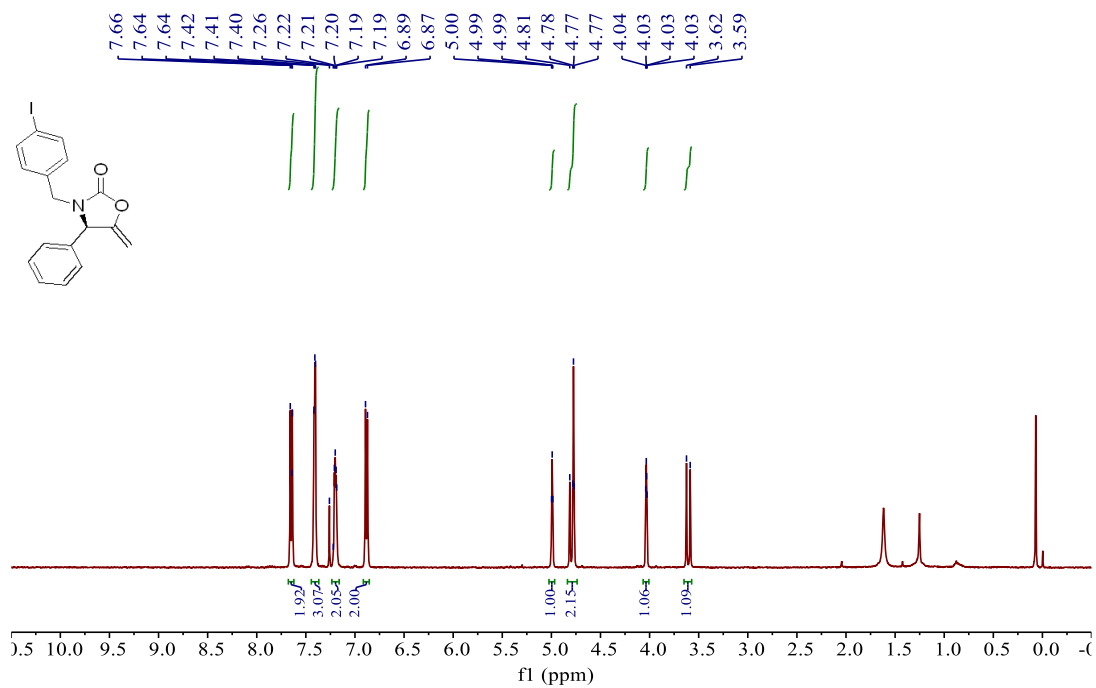

<sup>1</sup>H NMR spectra (400 MHz, CDCl<sub>3</sub>) of **3af**

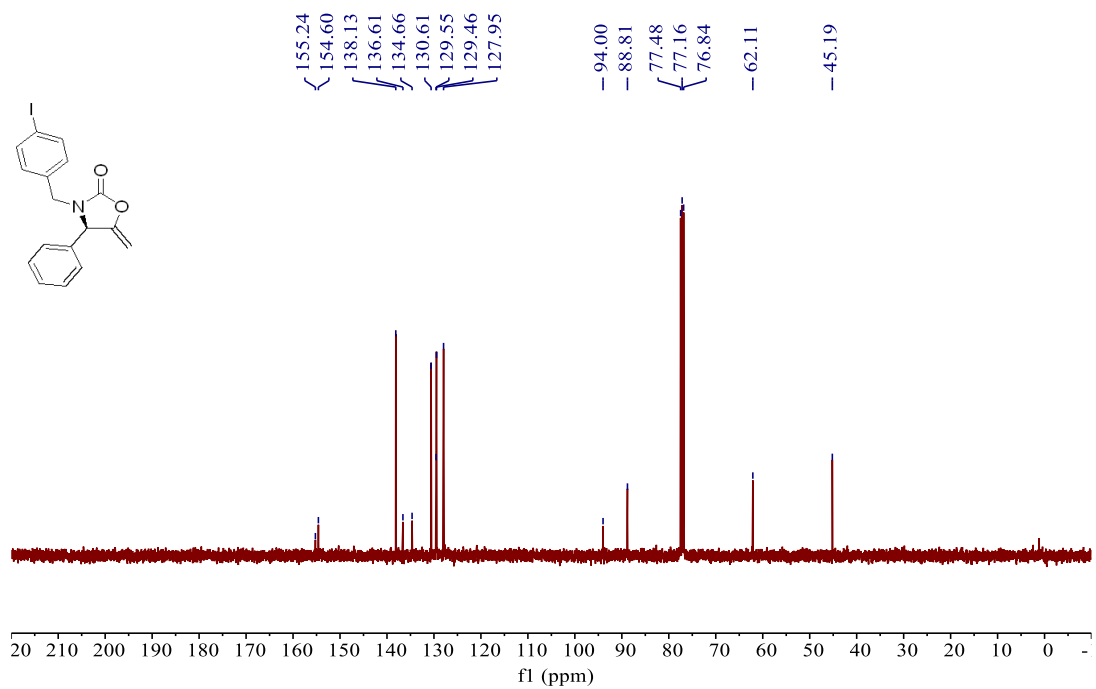

<sup>13</sup>C NMR spectra (101 MHz, CDCl<sub>3</sub>) of **3af**

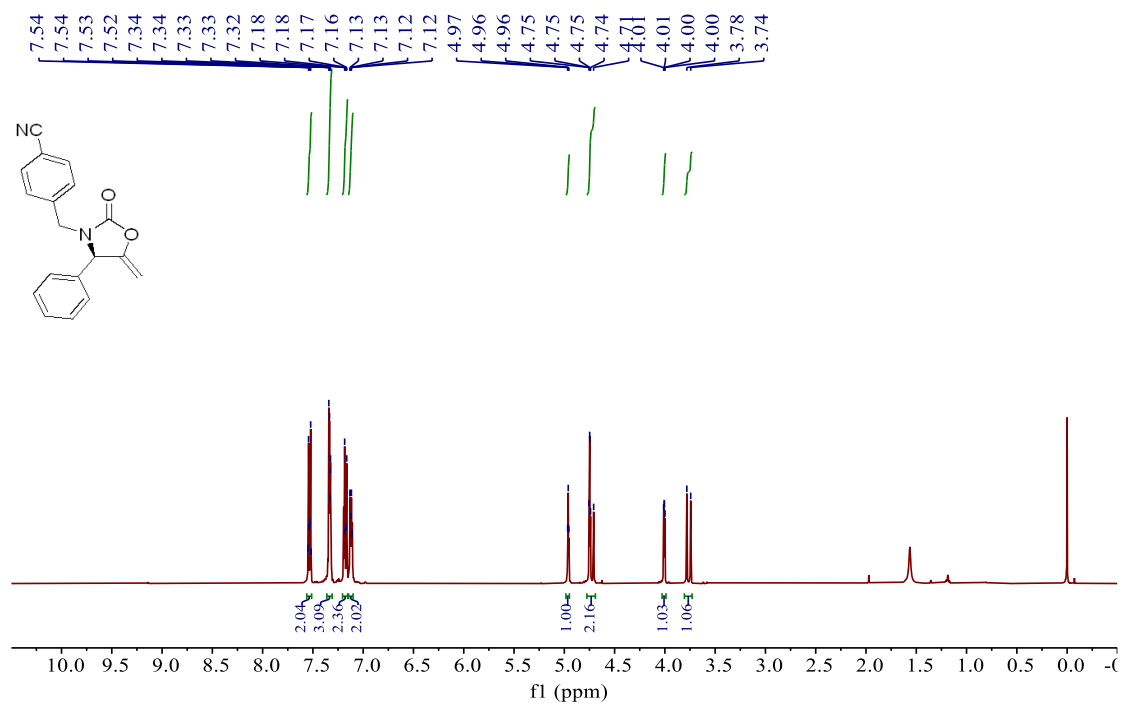

<sup>1</sup>H NMR spectra (400 MHz, CDCl<sub>3</sub>) of **3ag**

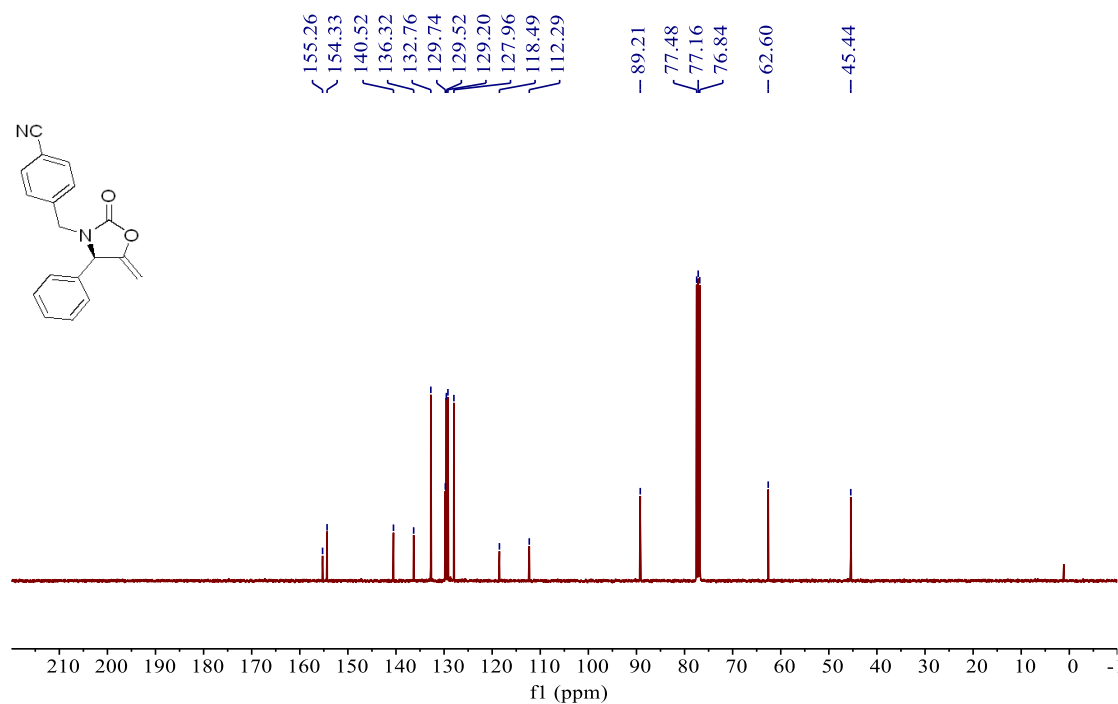

<sup>13</sup>C NMR spectra (101 MHz, CDCl<sub>3</sub>) of **3ag**



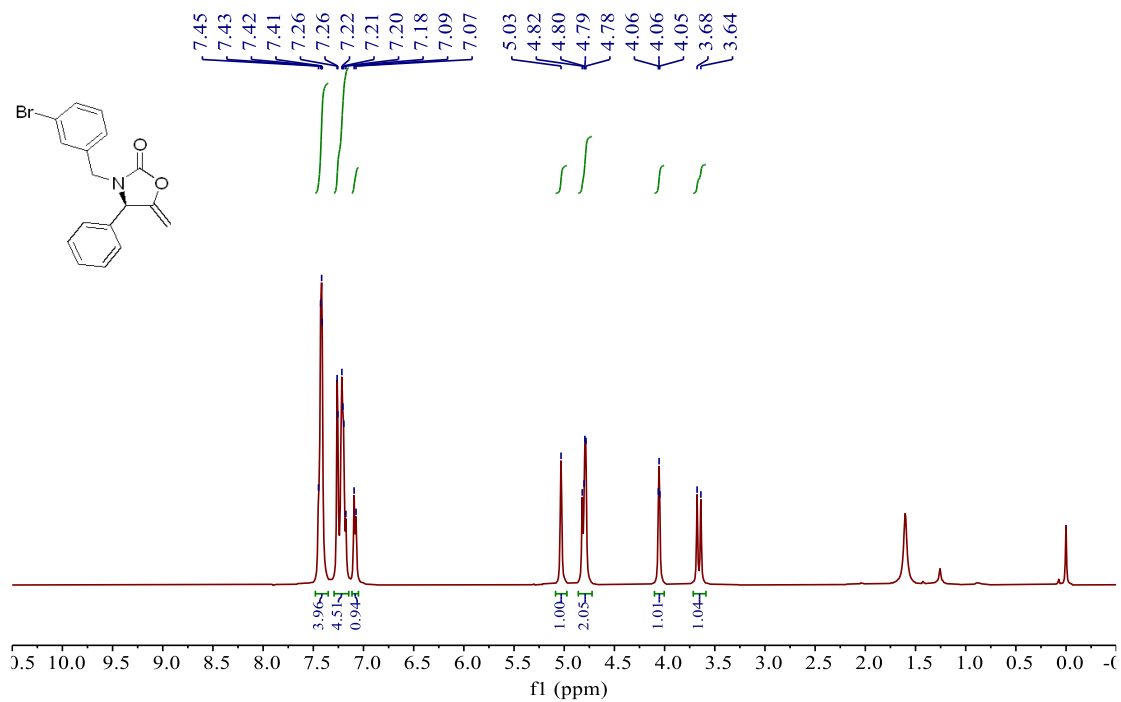

**<sup>1</sup>H NMR spectra (400 MHz, CDCl<sub>3</sub>) of **3ah****

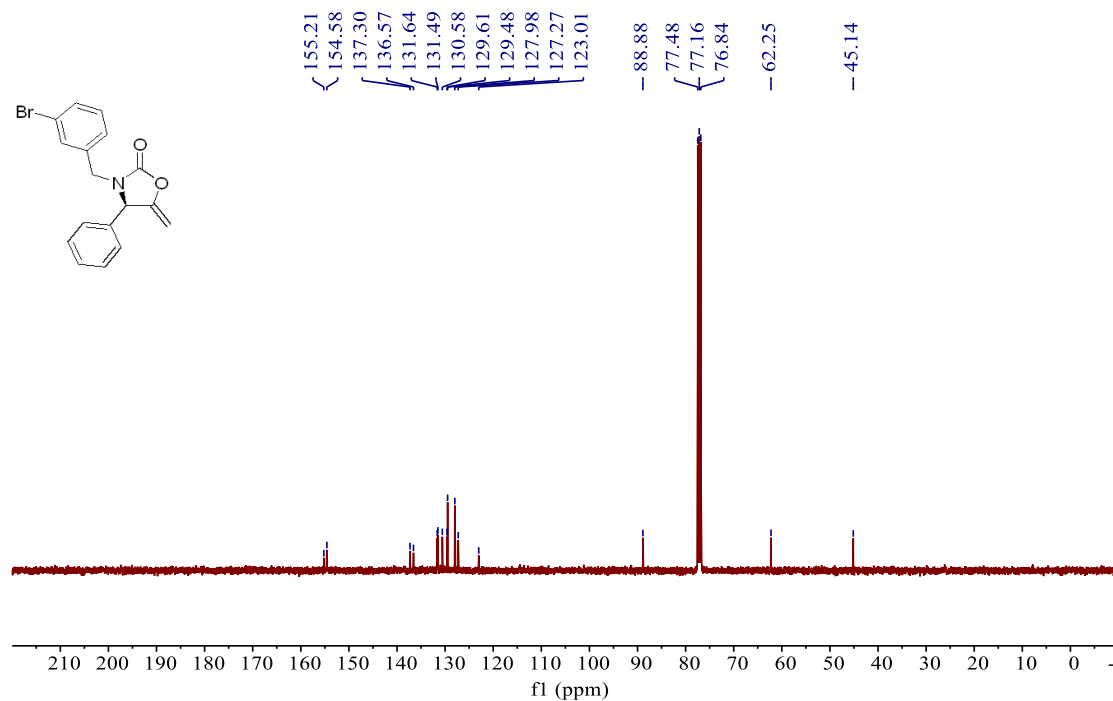

**<sup>13</sup>C NMR spectra (101 MHz, CDCl<sub>3</sub>) of **3ah****

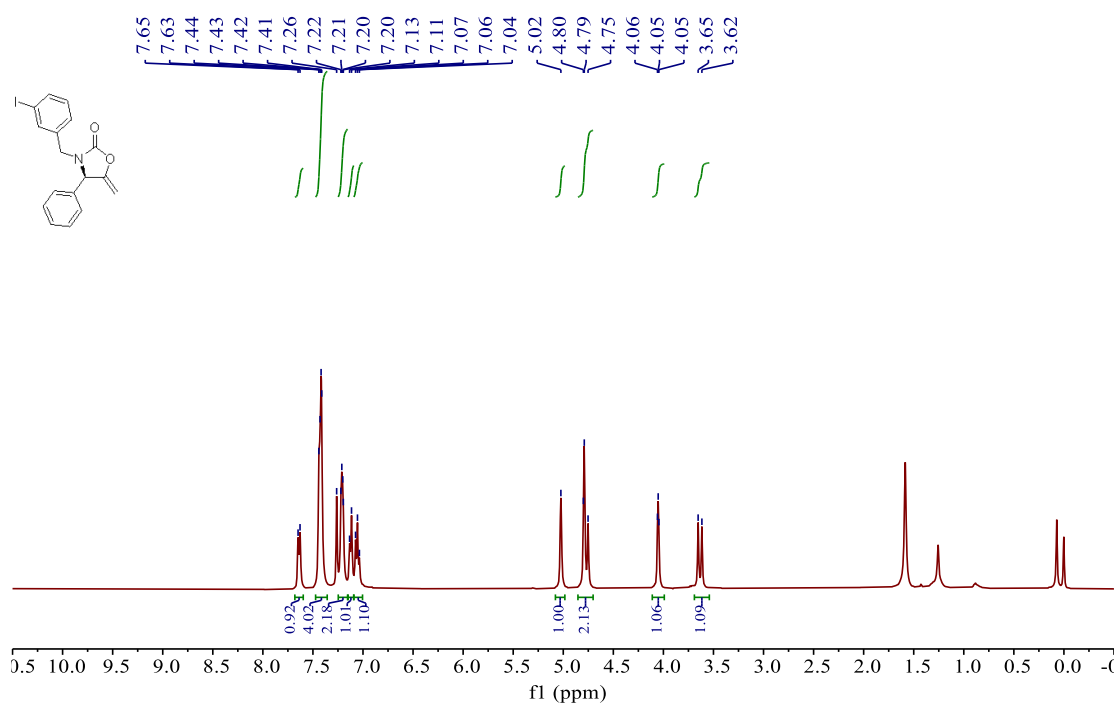

<sup>1</sup>H NMR spectra (400 MHz, CDCl<sub>3</sub>) of **3ai**

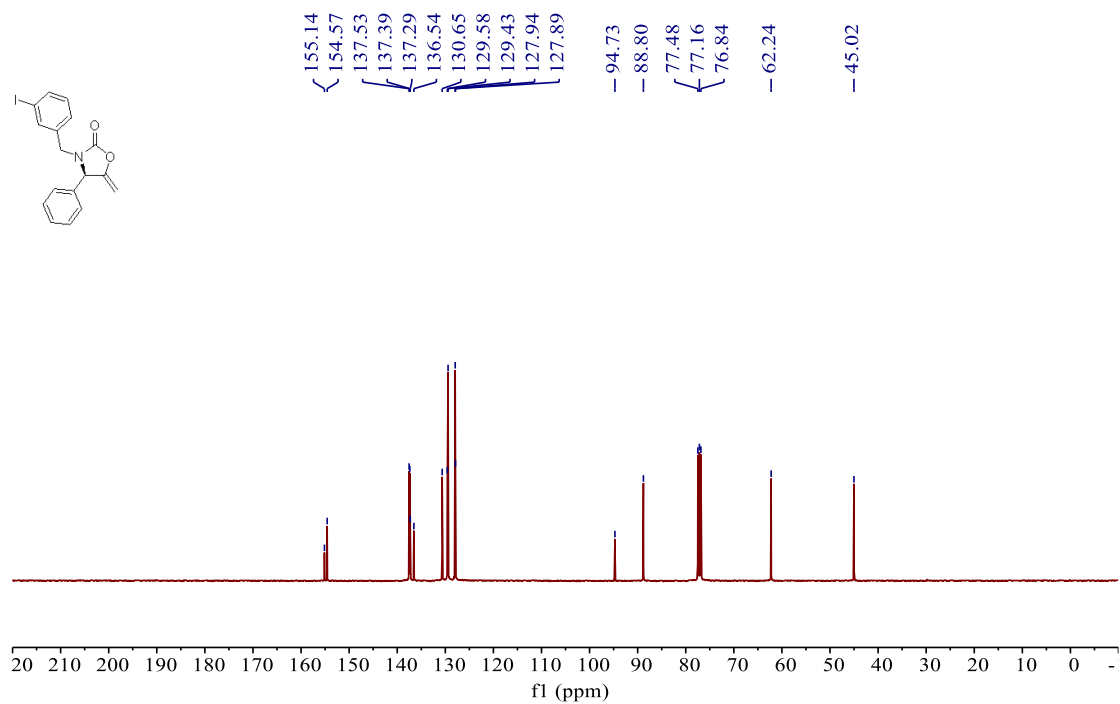

<sup>13</sup>C NMR spectra (101 MHz, CDCl<sub>3</sub>) of **3ai**

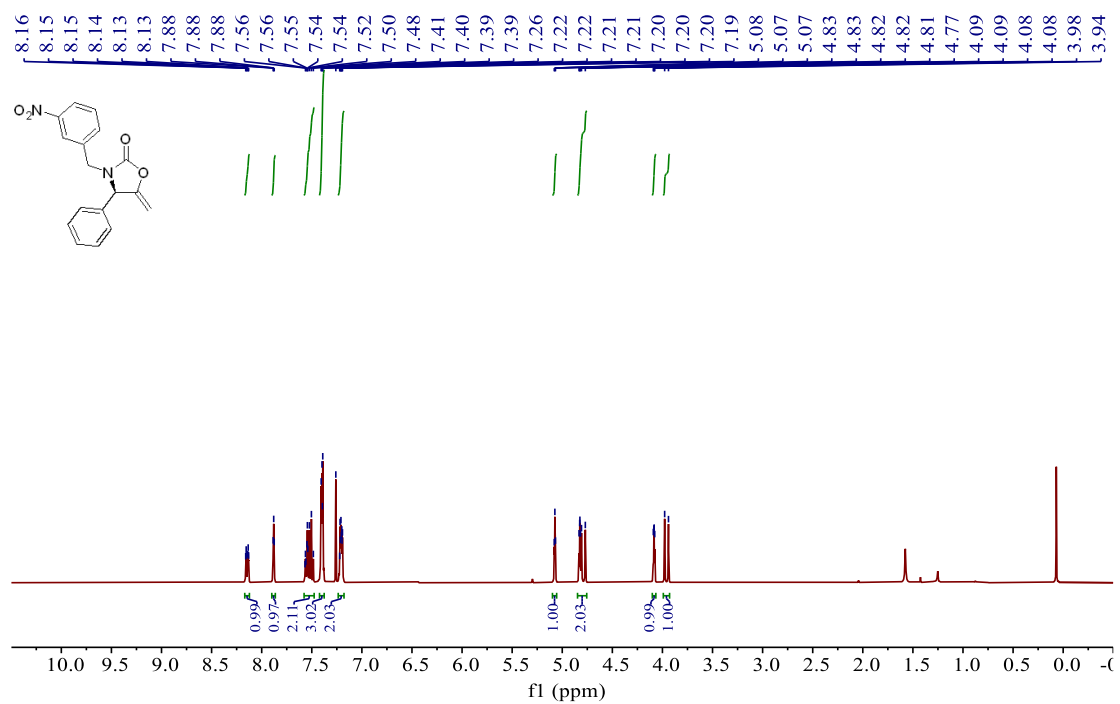

**<sup>1</sup>H NMR spectra (400 MHz, CDCl<sub>3</sub>) of 3aj**

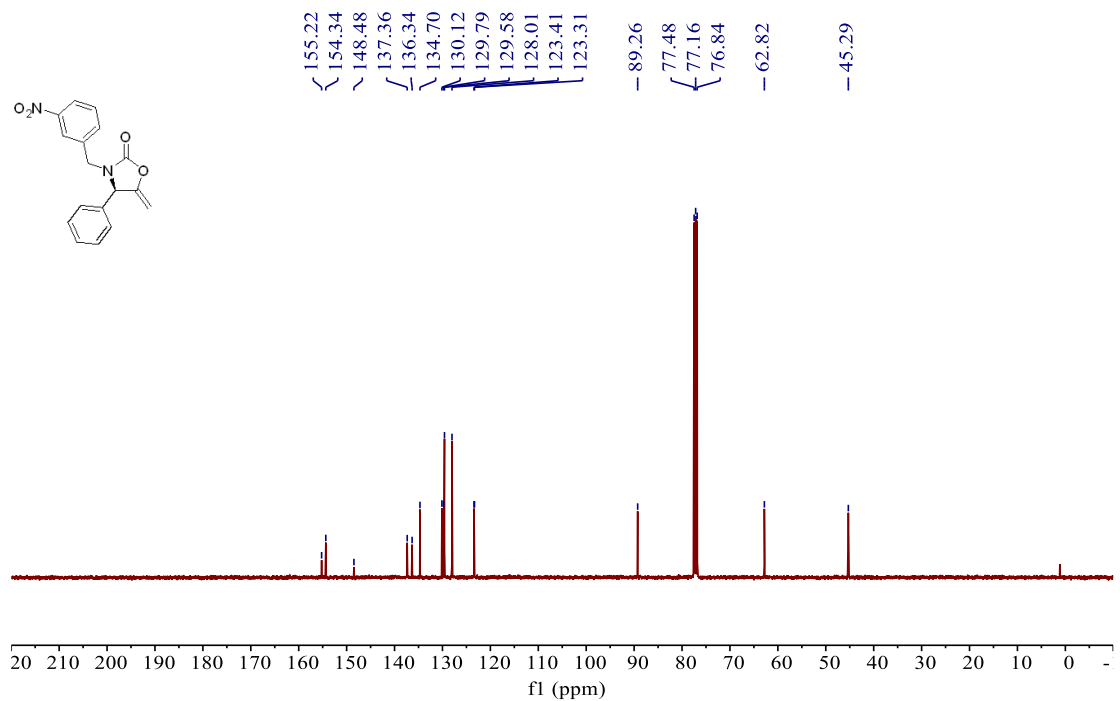

**<sup>13</sup>C NMR spectra (101 MHz, CDCl<sub>3</sub>) of 3aj**

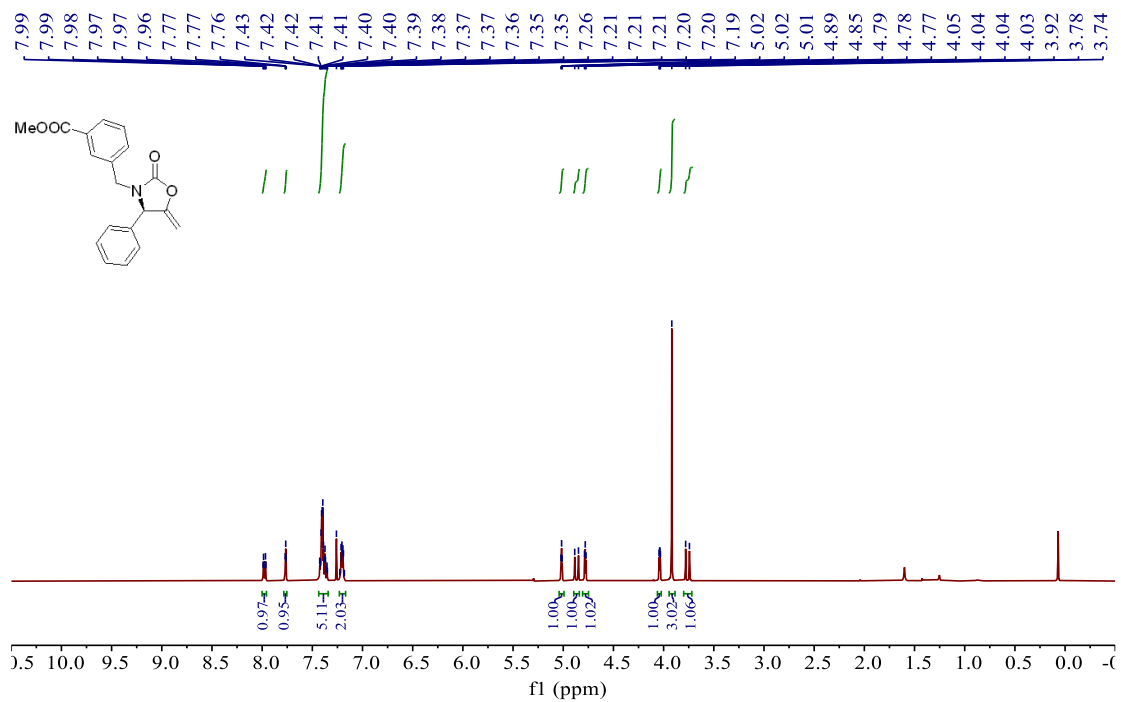

<sup>1</sup>H NMR spectra (400 MHz, CDCl<sub>3</sub>) of 3ak

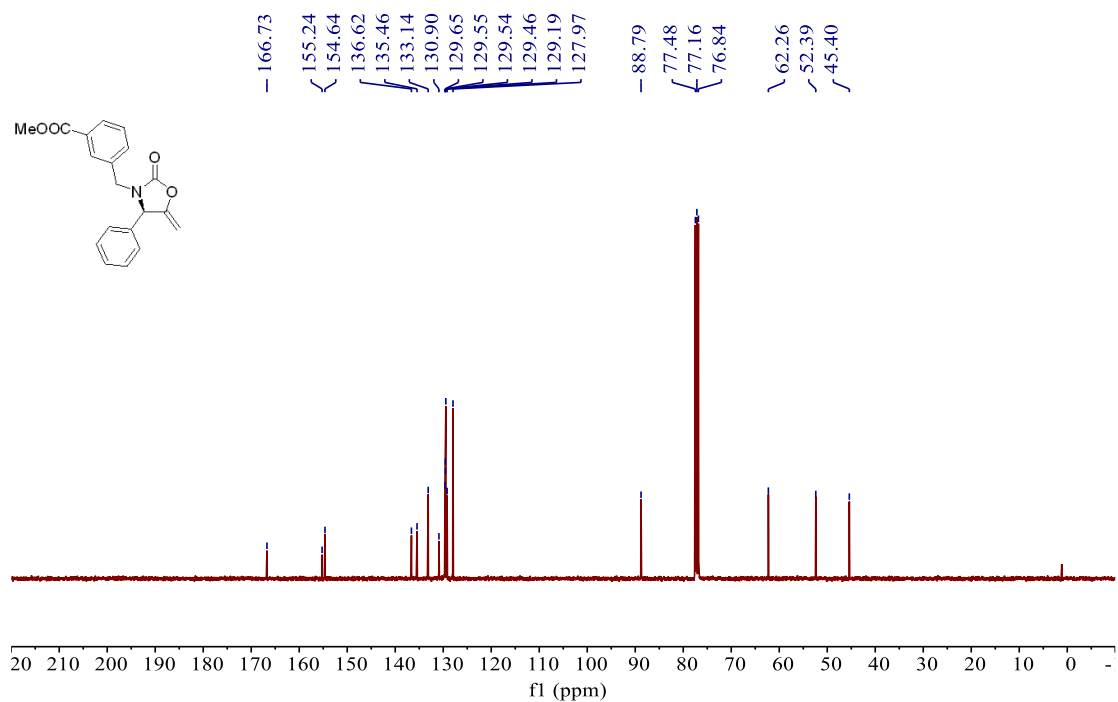

<sup>13</sup>C NMR spectra (101 MHz, CDCl<sub>3</sub>) of 3ak

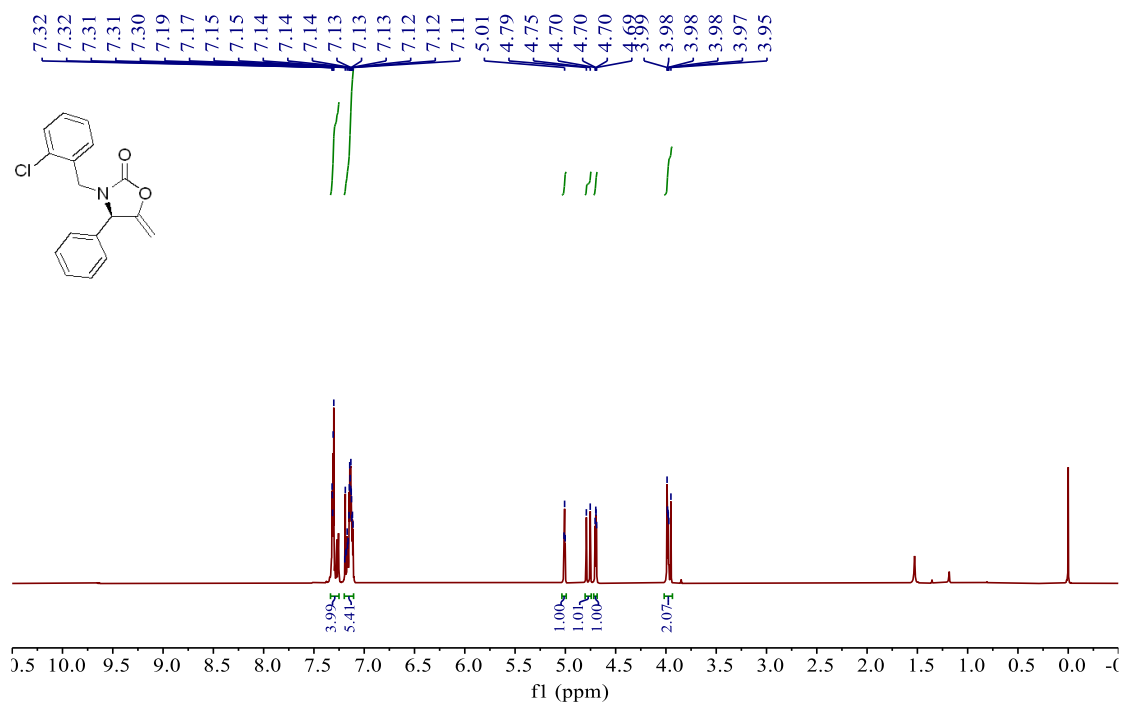

<sup>1</sup>H NMR spectra (400 MHz, CDCl<sub>3</sub>) of **3al**

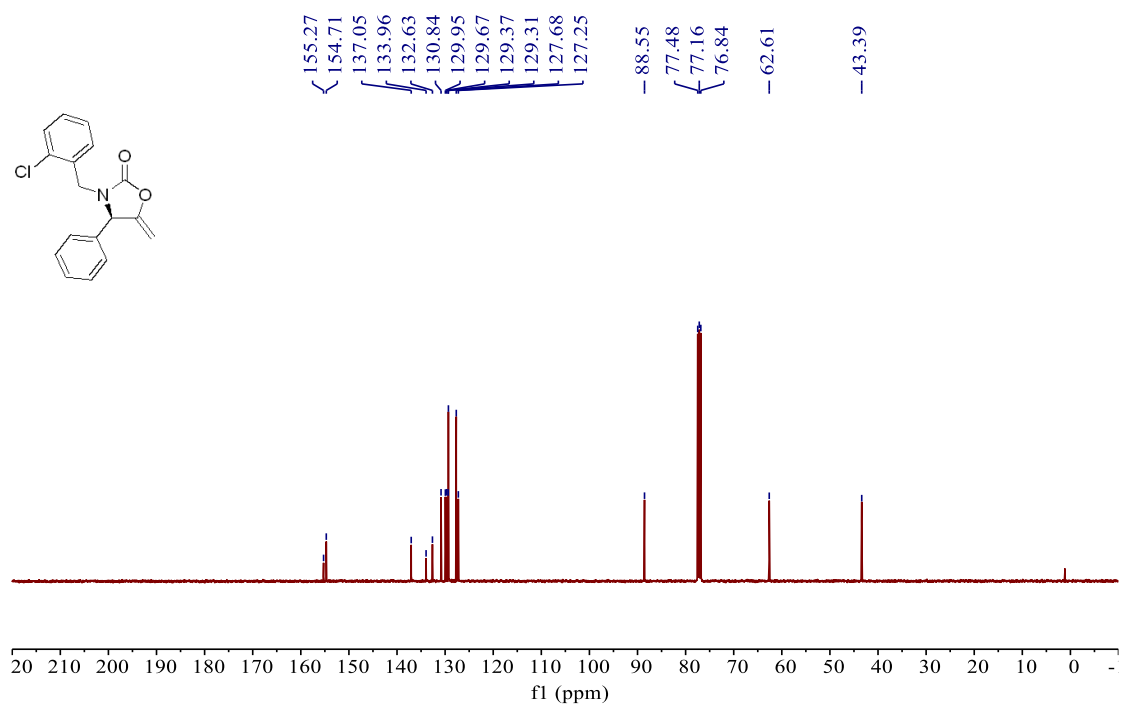

<sup>13</sup>C NMR spectra (101 MHz, CDCl<sub>3</sub>) of **3al**

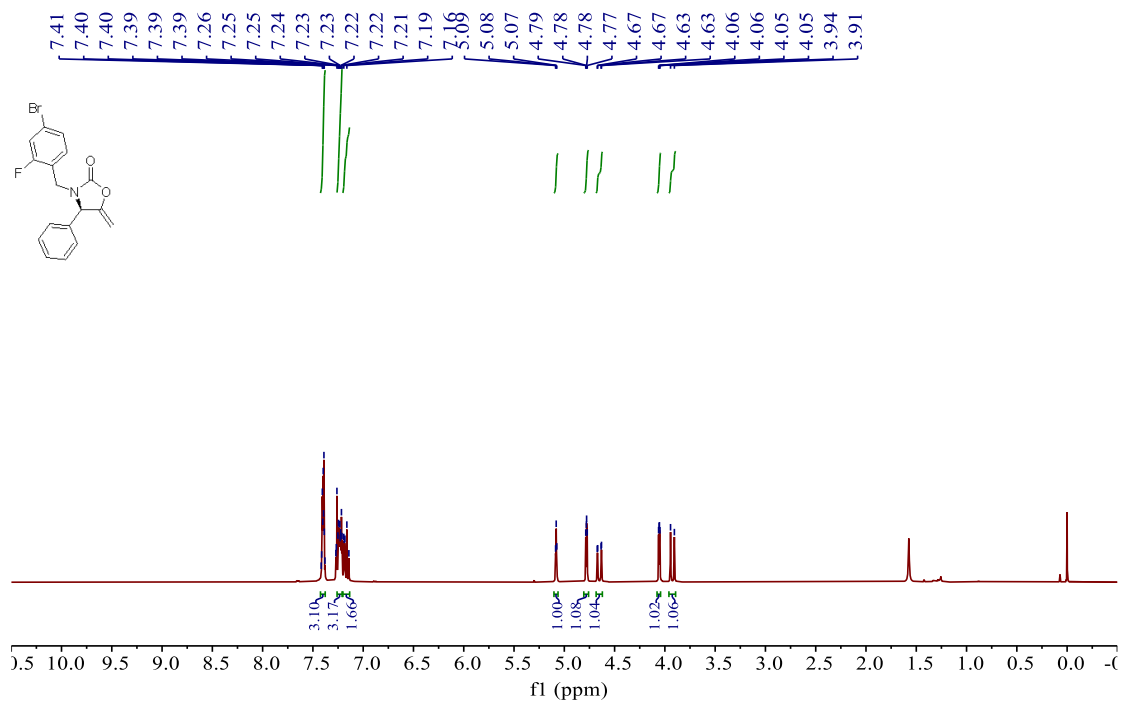

$^1\text{H}$  NMR spectra (400 MHz,  $\text{CDCl}_3$ ) of **3am**

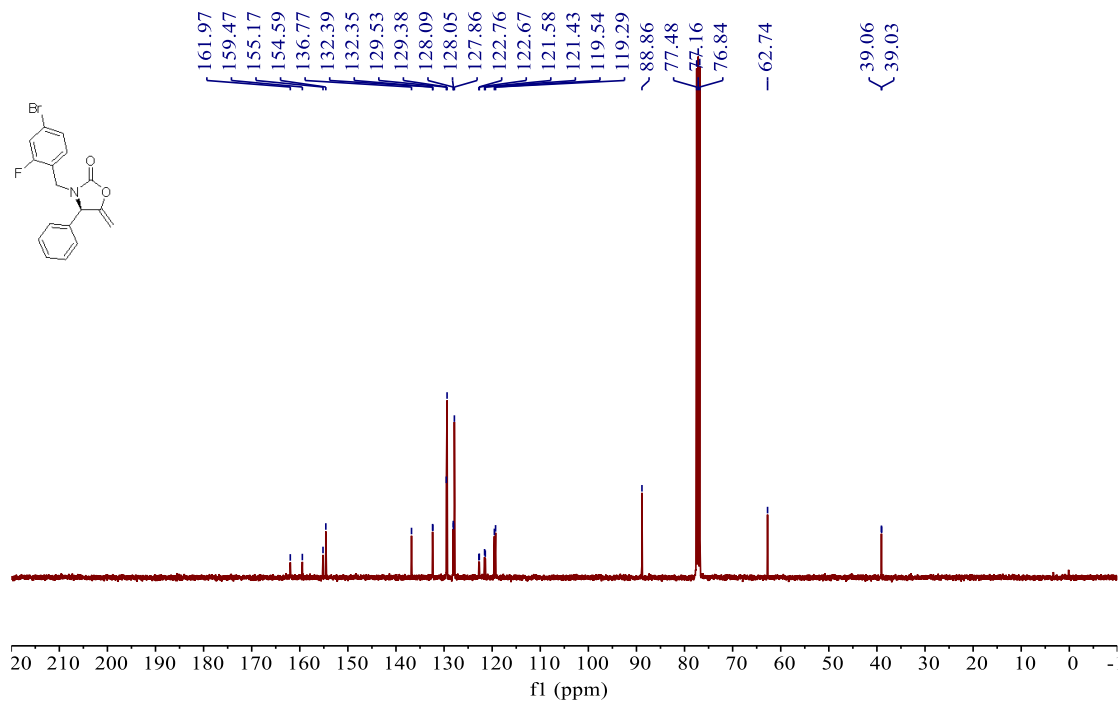

$^{13}\text{C}$  NMR spectra (101 MHz,  $\text{CDCl}_3$ ) of **3am**

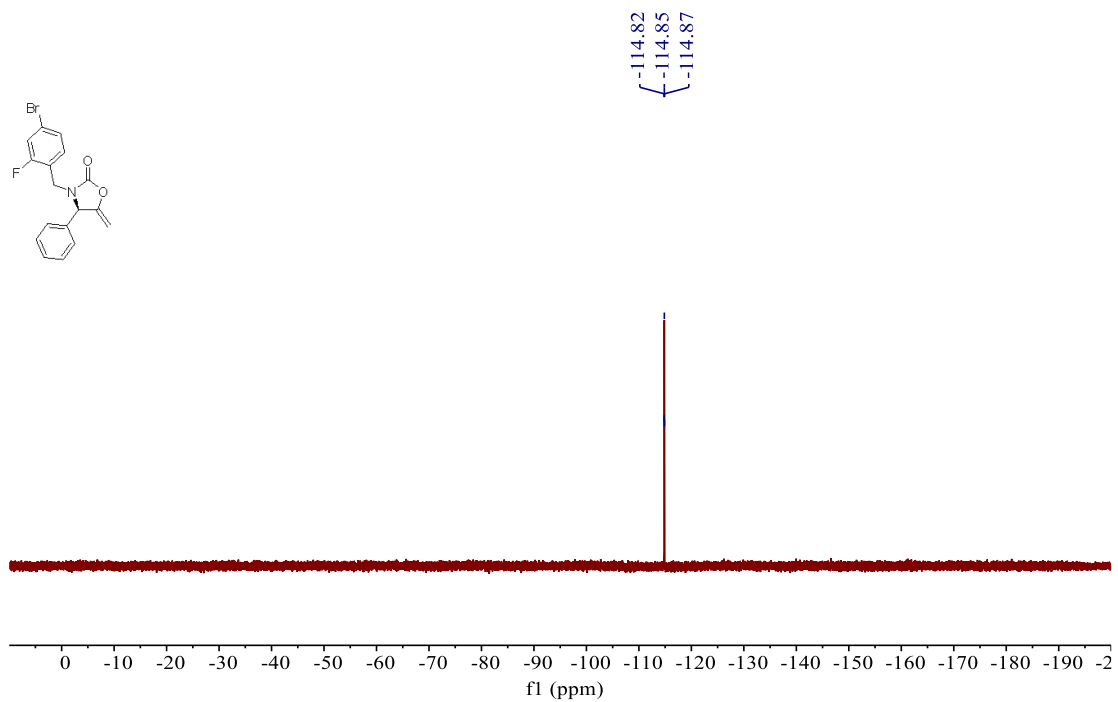

$^{19}\text{F}$  NMR spectra (376 MHz,  $\text{CDCl}_3$ ) of 3am

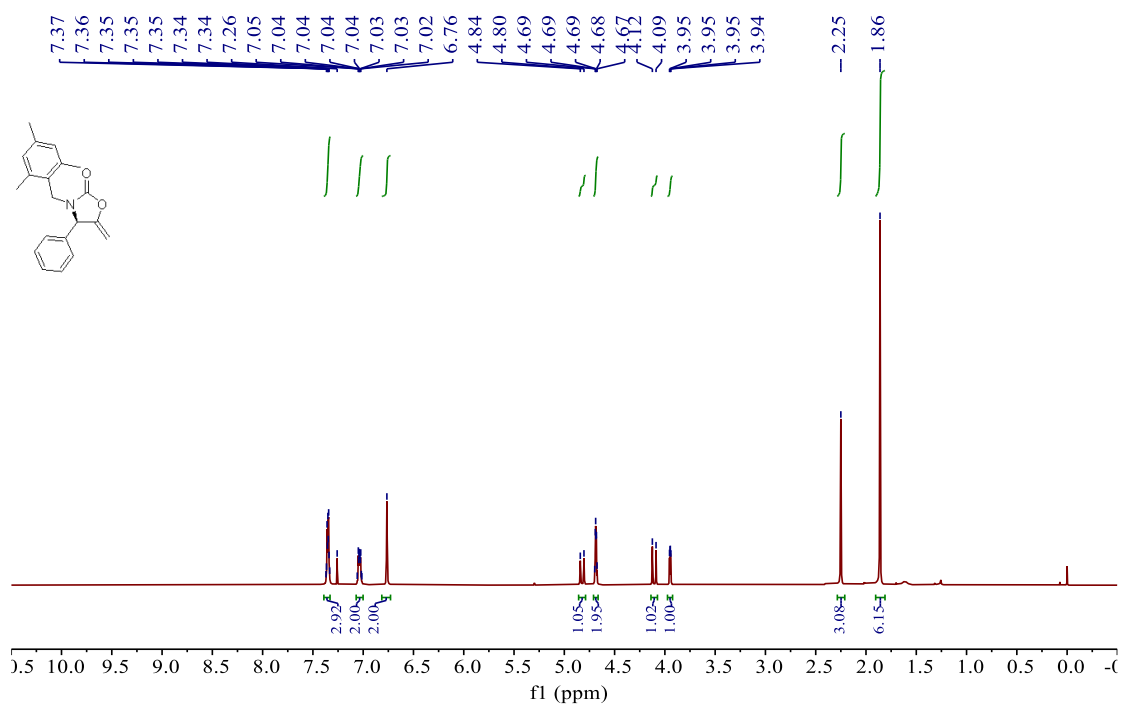

$^1\text{H}$  NMR spectra (400 MHz,  $\text{CDCl}_3$ ) of 3am

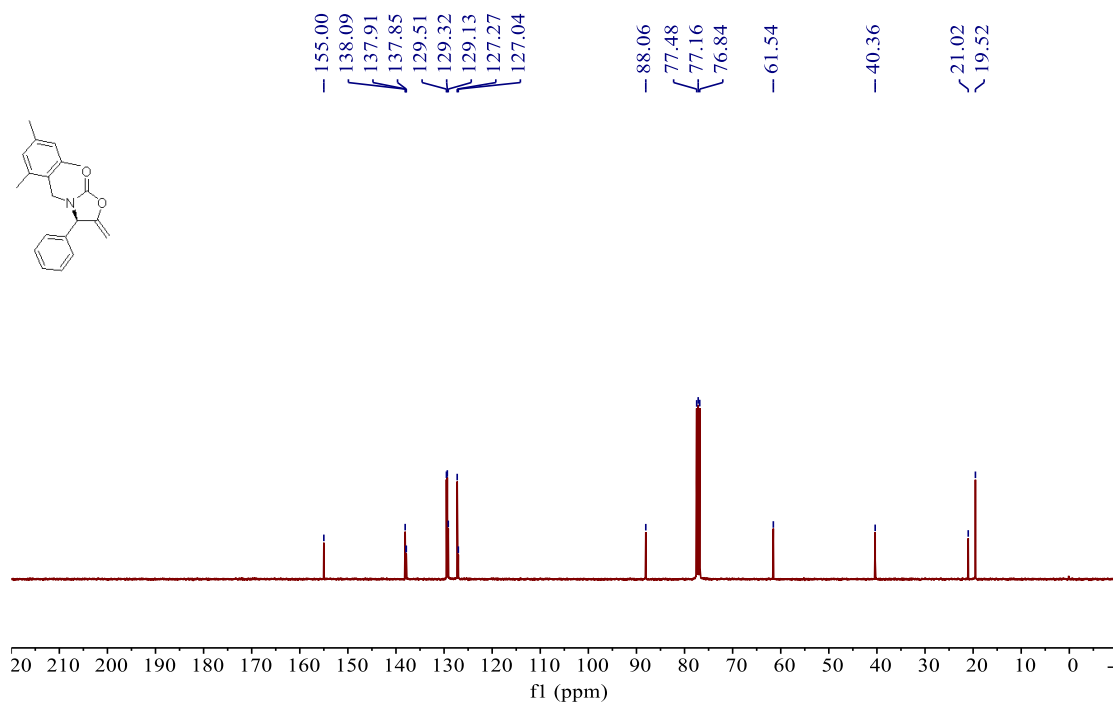

<sup>13</sup>C NMR spectra (101 MHz, CDCl<sub>3</sub>) of **3an**

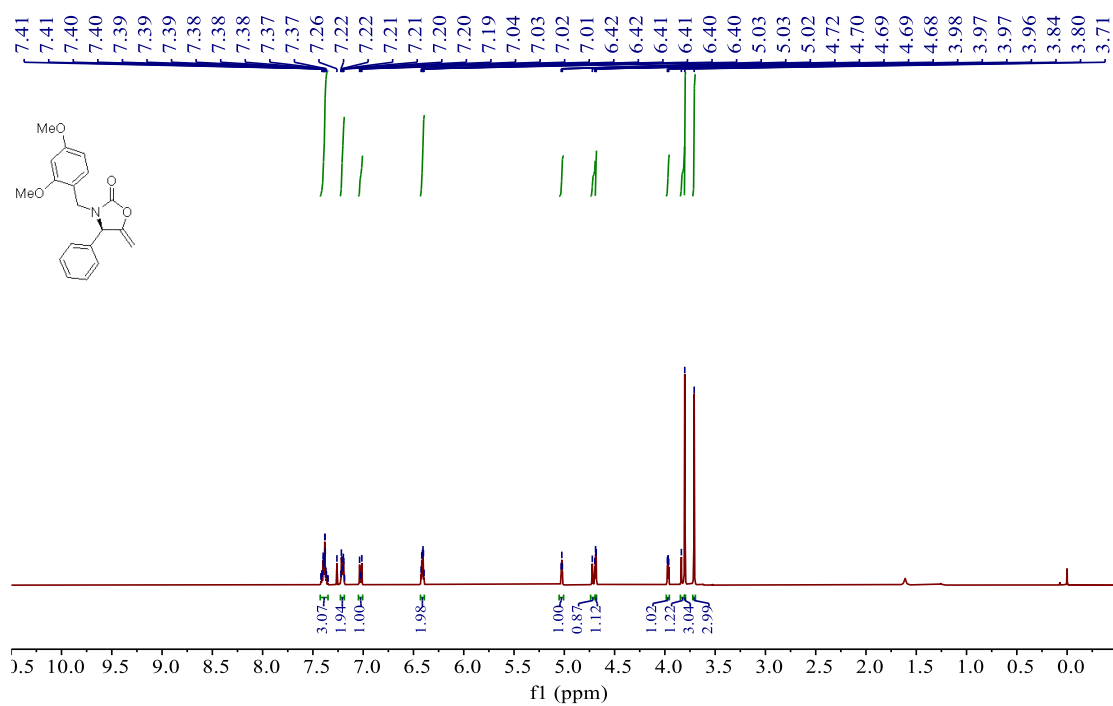

<sup>1</sup>H NMR spectra (400 MHz, CDCl<sub>3</sub>) of **3ao**



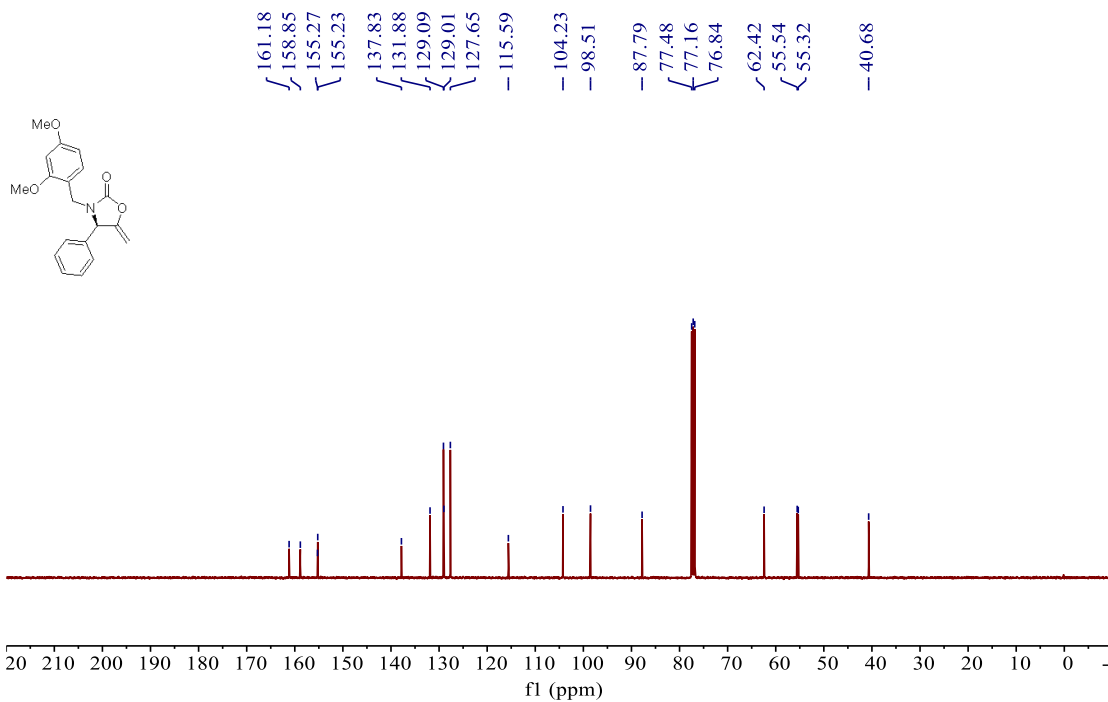

$^{13}\text{C}$  NMR spectra (101 MHz,  $\text{CDCl}_3$ ) of **3ao**

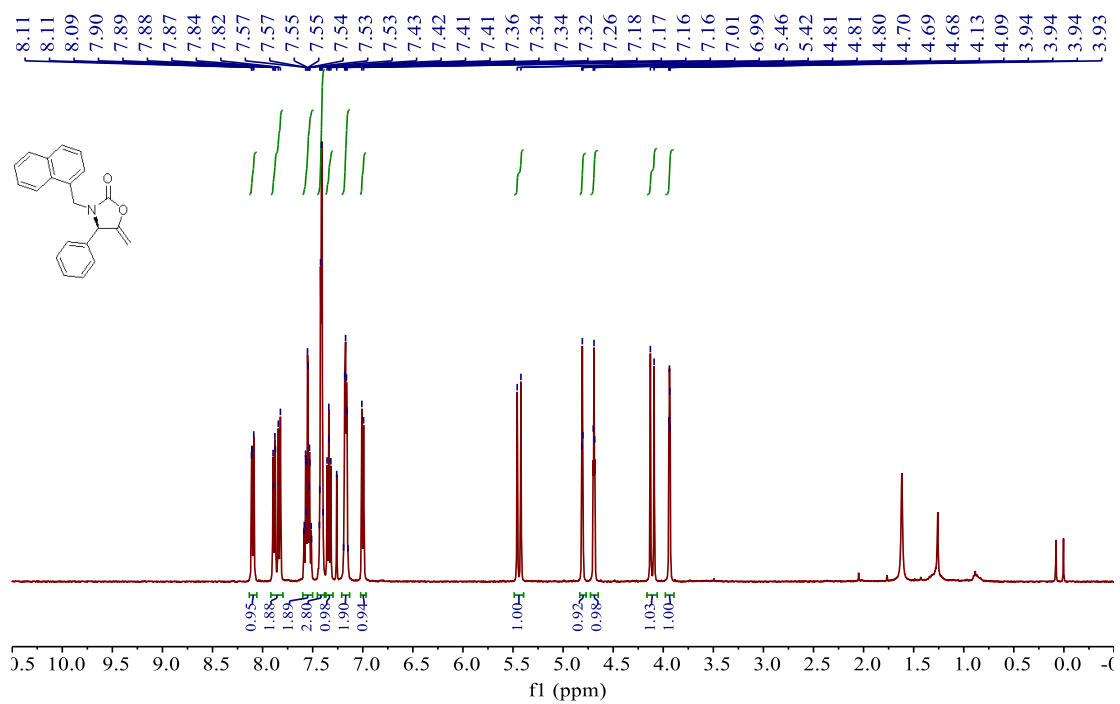

$^1\text{H}$  NMR spectra (400 MHz,  $\text{CDCl}_3$ ) of **3ap**

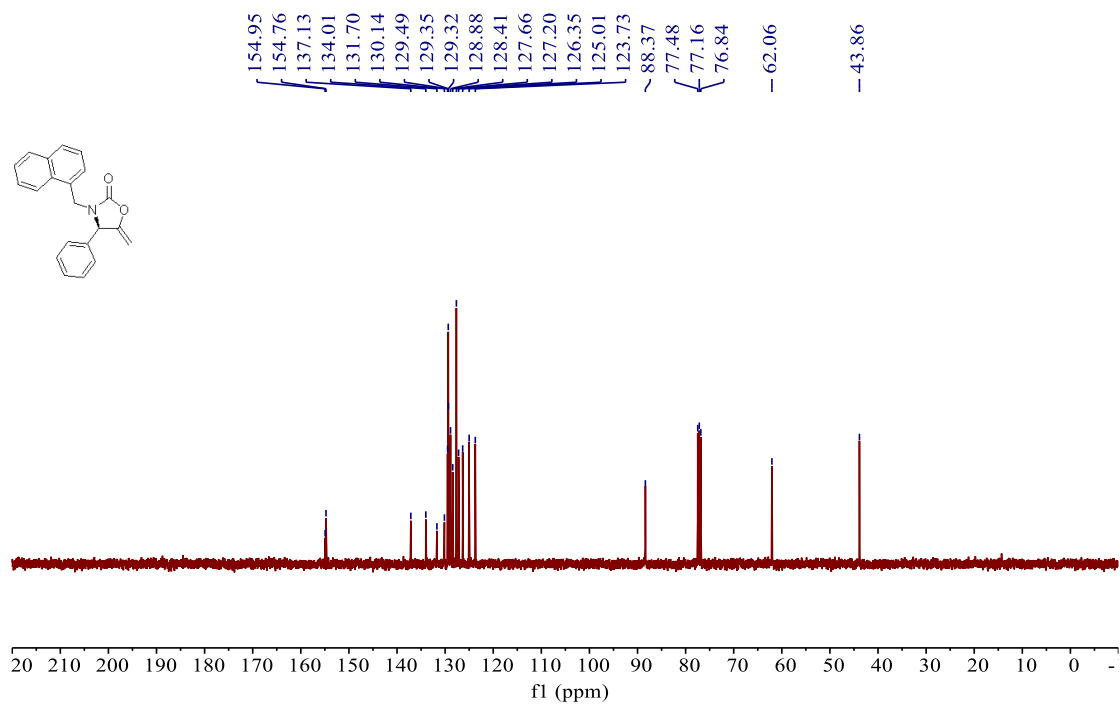

<sup>13</sup>C NMR spectra (101 MHz, CDCl<sub>3</sub>) of **3ap**

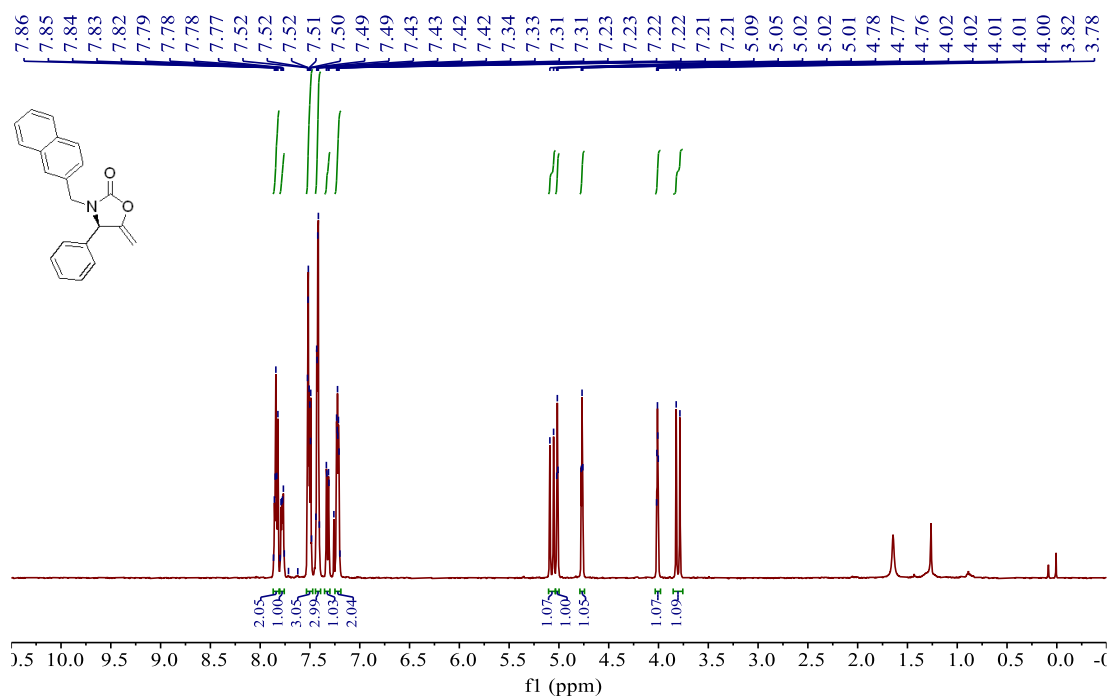

<sup>1</sup>H NMR spectra (400 MHz, CDCl<sub>3</sub>) of **3aq**

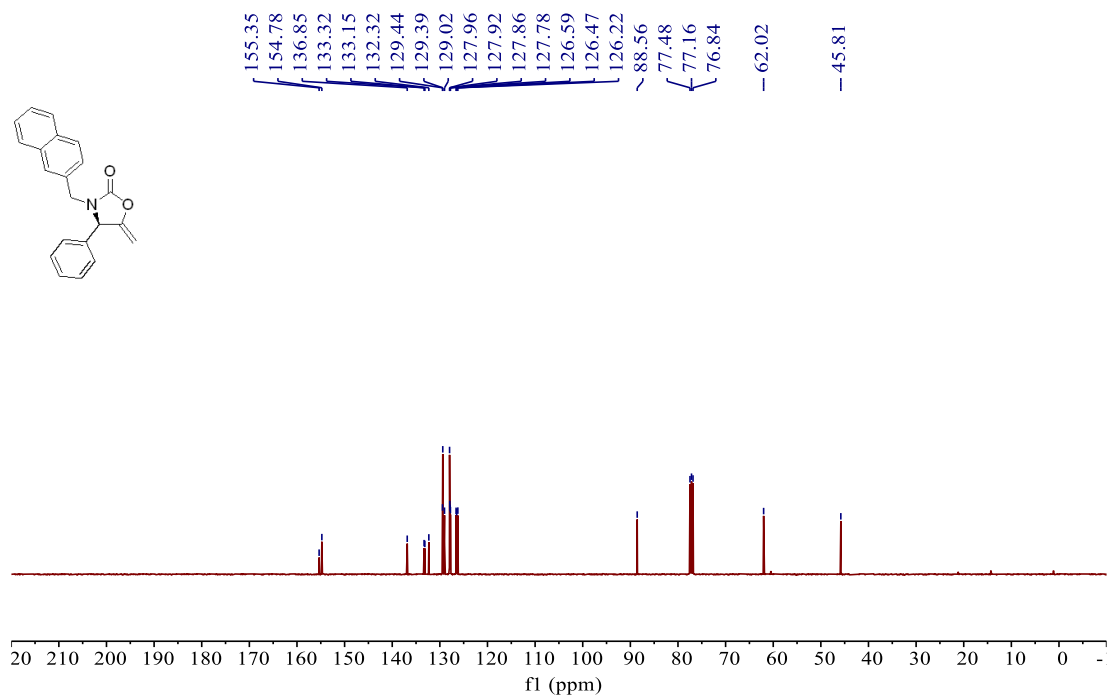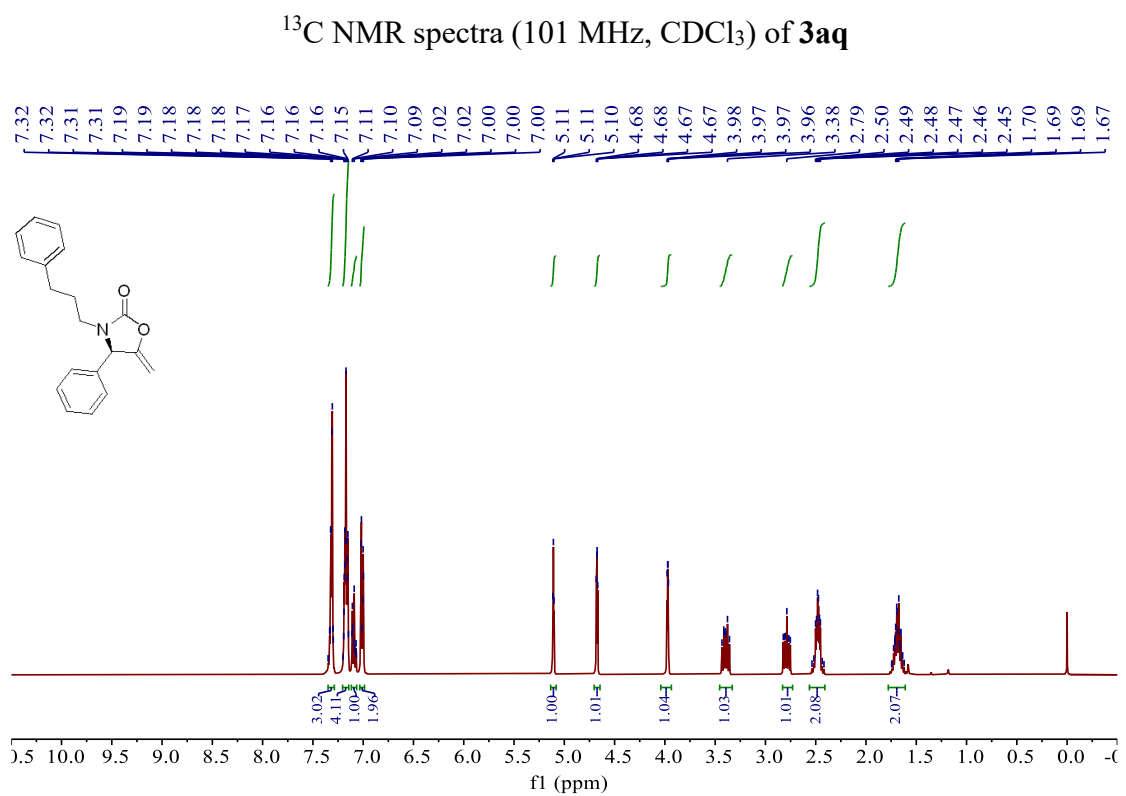

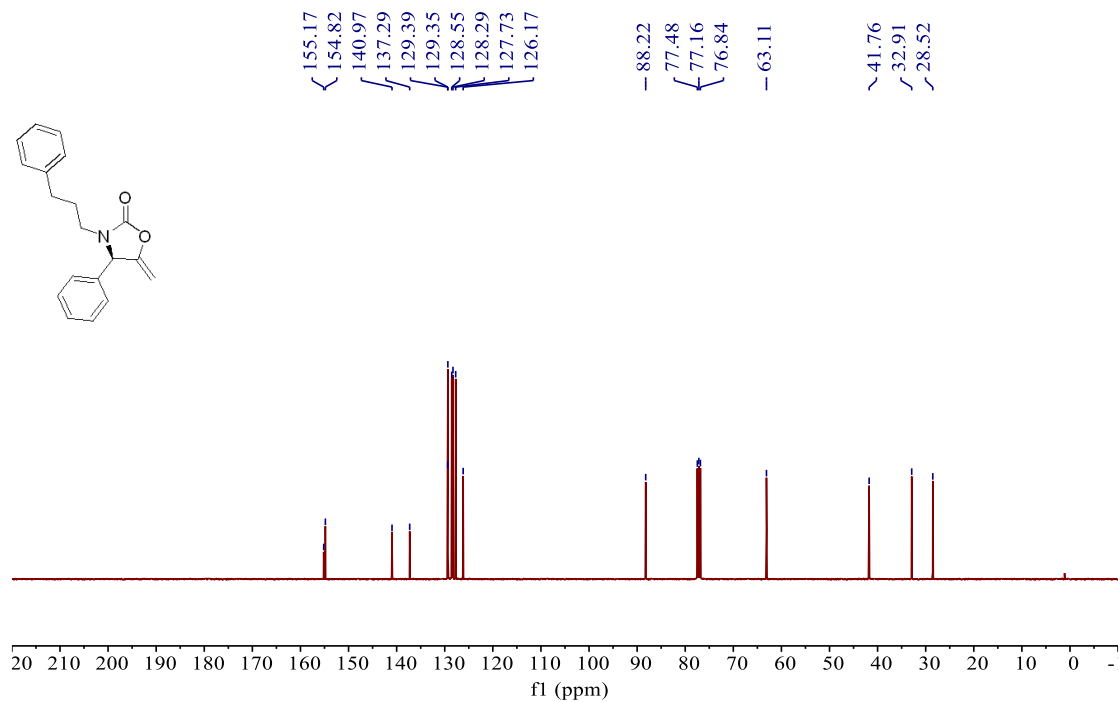

**<sup>13</sup>C NMR spectra (101 MHz, CDCl<sub>3</sub>) of **3ar****

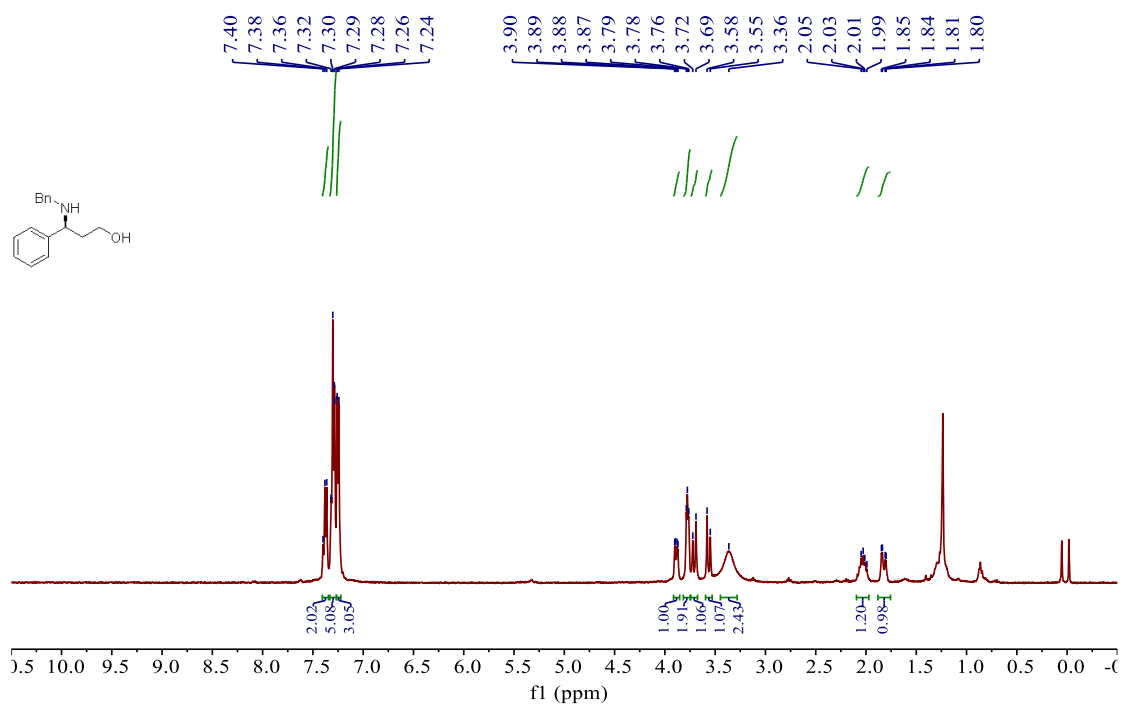

**<sup>1</sup>H NMR spectra (400 MHz, CDCl<sub>3</sub>) of **4aa****

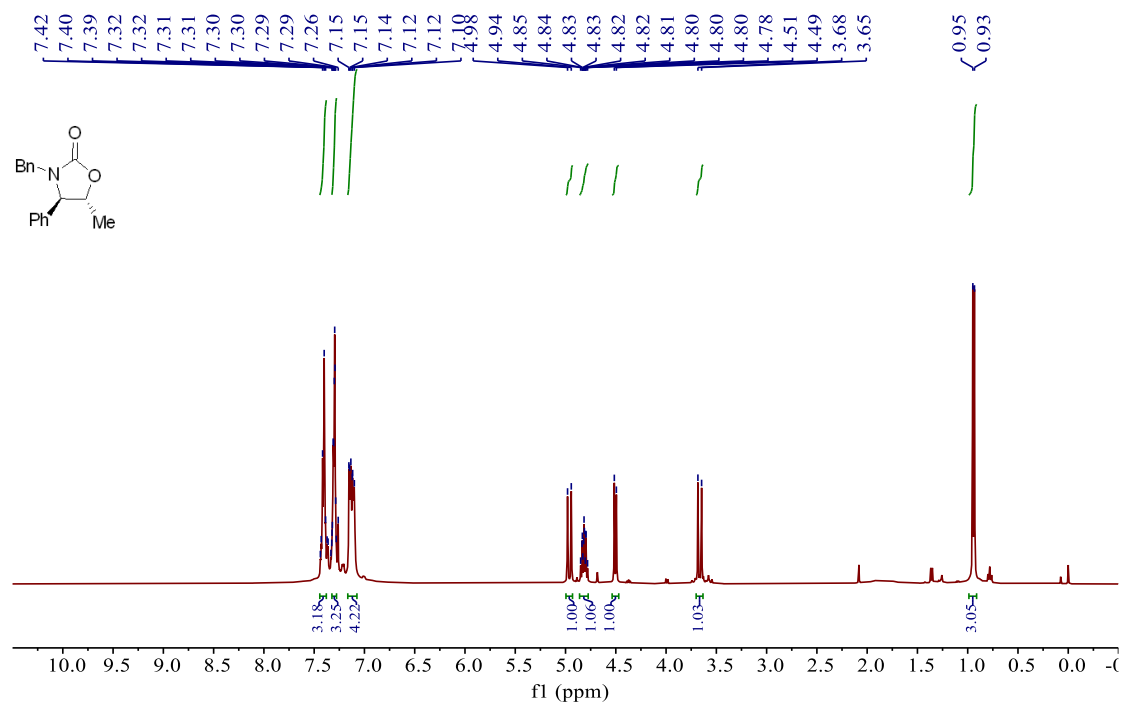

<sup>1</sup>H NMR spectra (400 MHz, CDCl<sub>3</sub>) of **4ab**

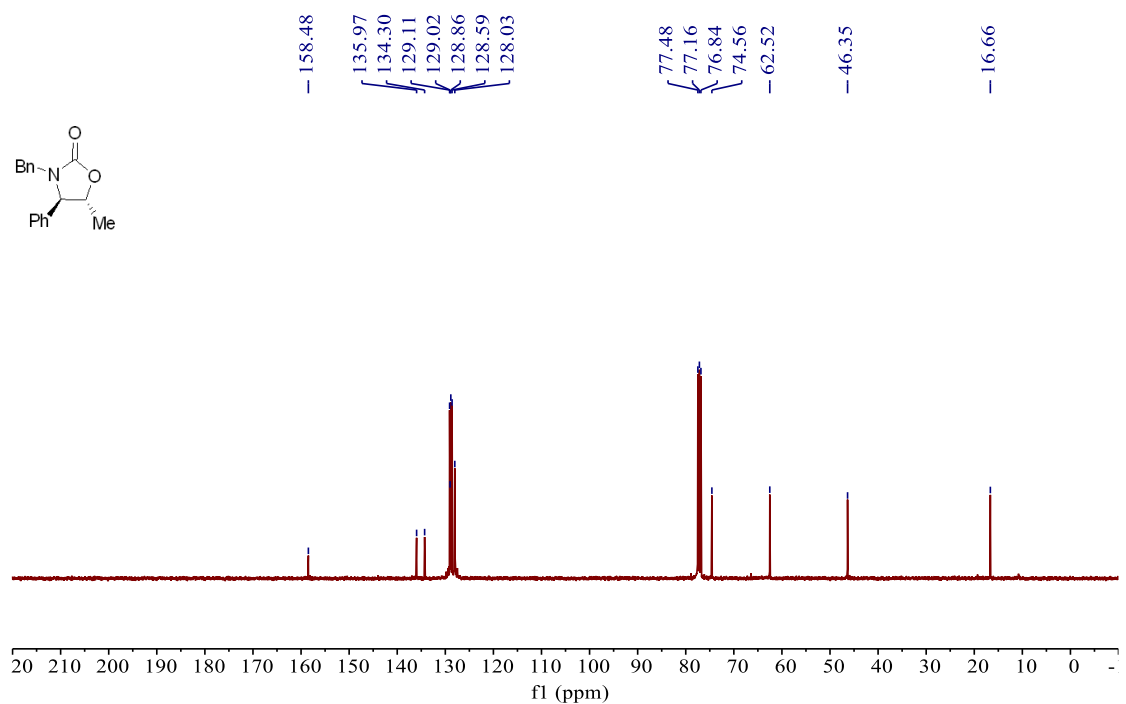

<sup>13</sup>C NMR spectra (400 MHz, CDCl<sub>3</sub>) of **4ab**

## 6. HPLC Chromatograms

### (*R*)-3-benzyl-5-methylene-4-phenyloxazolidin-2-one (3aa)

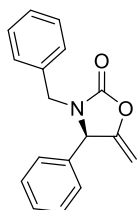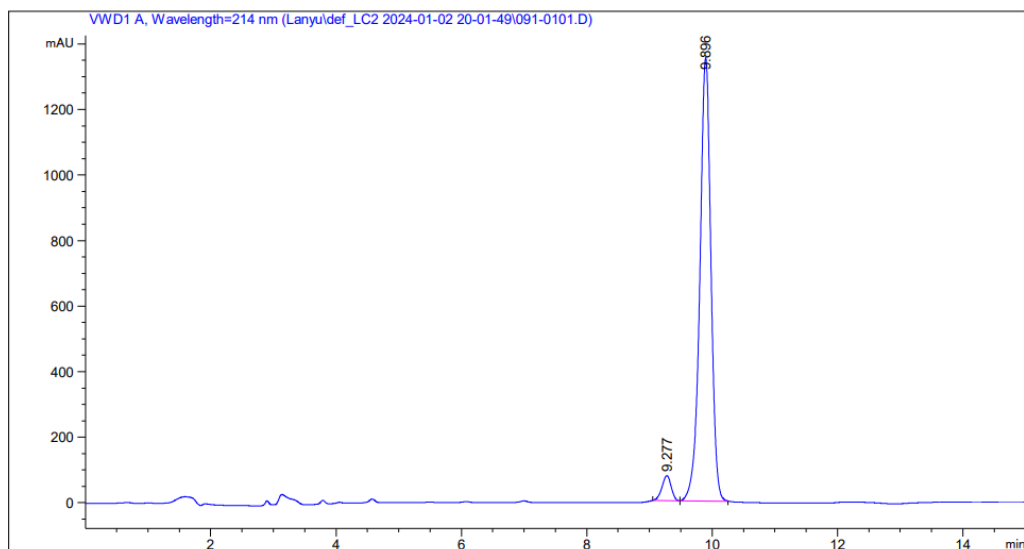

| 峰 # | 保留时间 [min] | 类型   | 峰宽 [min] | 峰面积 [mAU*s] | 峰高 [mAU]   | 峰面积 %   |
|-----|------------|------|----------|-------------|------------|---------|
| 1   | 9.277      | MF R | 0.1690   | 770.71777   | 75.99125   | 4.4334  |
| 2   | 9.896      | FM R | 0.2046   | 1.66138e4   | 1353.11865 | 95.5666 |

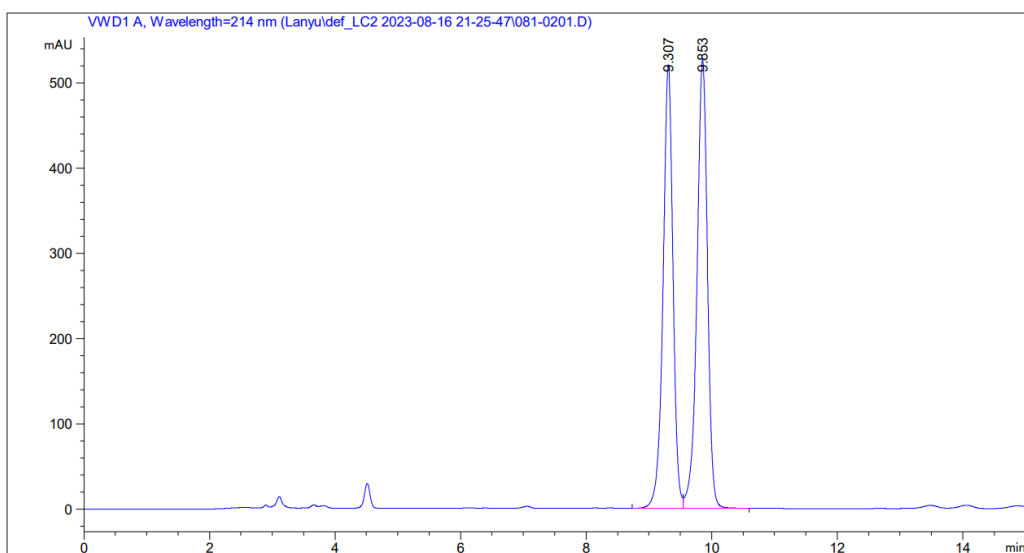

| 峰 # | 保留时间 [min] | 类型 | 峰宽 [min] | 峰面积 [mAU*s] | 峰高 [mAU]  | 峰面积 %   |
|-----|------------|----|----------|-------------|-----------|---------|
| 1   | 9.307      | BV | 0.1676   | 5737.67188  | 520.49817 | 48.3709 |
| 2   | 9.853      | VB | 0.1777   | 6124.15186  | 526.53735 | 51.6291 |

**(R)-3-benzyl-4-(4-(tert-butyl)phenyl)-5-methyleneoxazolidin-2-one (3ba)**

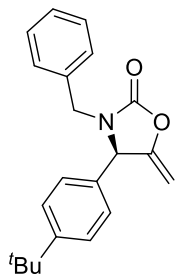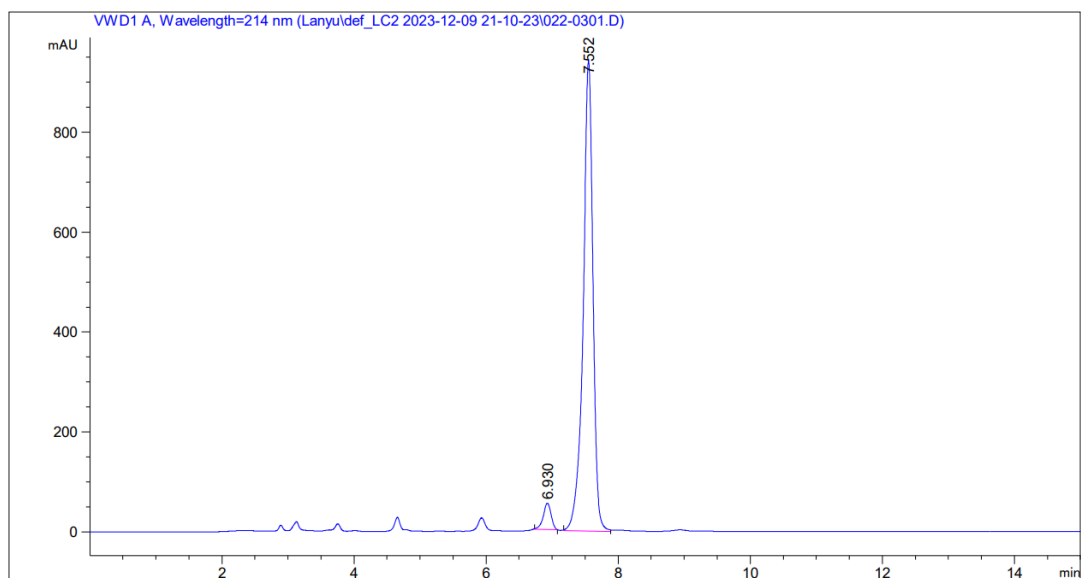

| 峰 # | 保留时间 [min] | 类型   | 峰宽 [min] | 峰面积 [mAU*s] | 峰高 [mAU]  | 峰面积 %   |
|-----|------------|------|----------|-------------|-----------|---------|
| 1   | 6.930      | MM R | 0.1373   | 434.55872   | 52.74535  | 4.3056  |
| 2   | 7.552      | MM R | 0.1709   | 9658.36328  | 941.69824 | 95.6944 |

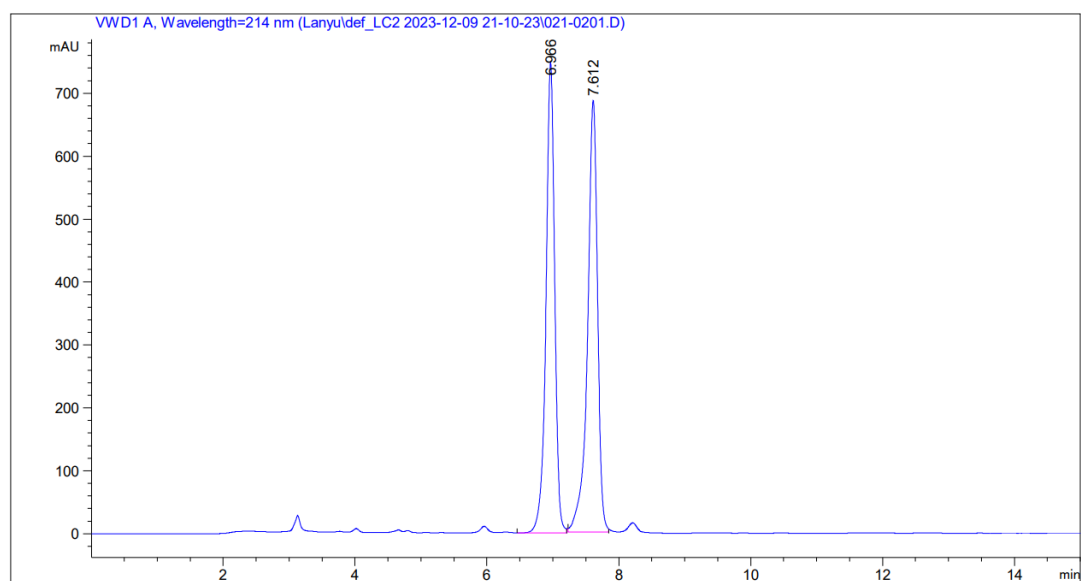

| 峰 # | 保留时间 [min] | 类型   | 峰宽 [min] | 峰面积 [mAU*s] | 峰高 [mAU]  | 峰面积 %   |
|-----|------------|------|----------|-------------|-----------|---------|
| 1   | 6.966      | BV   | 0.1377   | 6838.82129  | 747.43909 | 48.7697 |
| 2   | 7.612      | MM R | 0.1746   | 7183.87451  | 685.94214 | 51.2303 |

**(R)-3-benzyl-4-(4-fluorophenyl)-5-methyleneoxazolidin-2-one (3ca)**

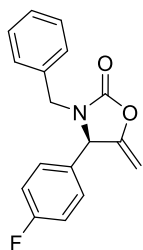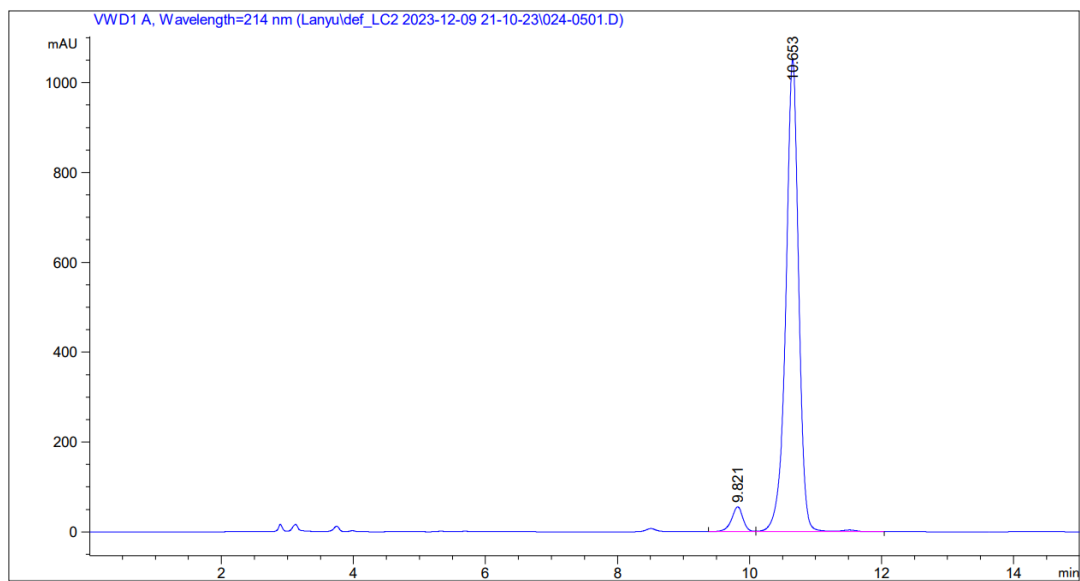

| 峰 # | 保留时间 [min] | 类型   | 峰宽 [min] | 峰面积 [mAU*s] | 峰高 [mAU]   | 峰面积 %   |
|-----|------------|------|----------|-------------|------------|---------|
| 1   | 9.821      | BV   | 0.1826   | 665.63147   | 55.21766   | 4.4813  |
| 2   | 10.653     | VV R | 0.2036   | 1.41879e4   | 1050.25818 | 95.5187 |

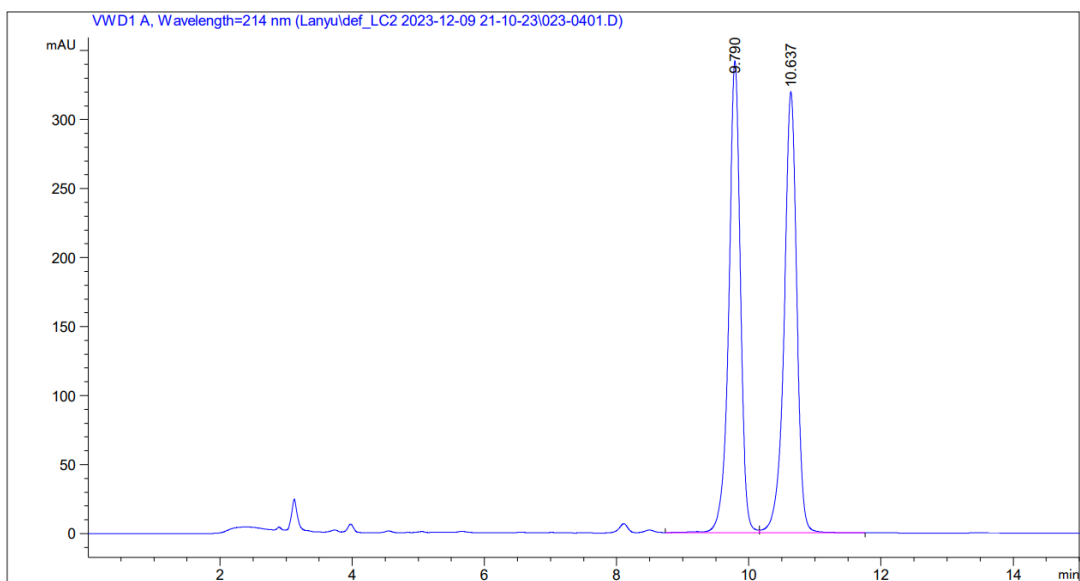



| 峰 # | 保留时间 [min] | 类型   | 峰宽 [min] | 峰面积 [mAU*s] | 峰高 [mAU]  | 峰面积 %   |
|-----|------------|------|----------|-------------|-----------|---------|
| 1   | 9.790      | VV R | 0.1837   | 4154.29443  | 341.93188 | 49.5275 |
| 2   | 10.637     | VB   | 0.2006   | 4233.55566  | 319.53448 | 50.4725 |

**(R)-3-benzyl-4-(4-chlorophenyl)-5-methyleneoxazolidin-2-one (3da)**

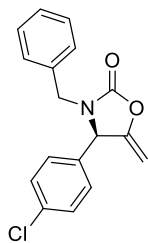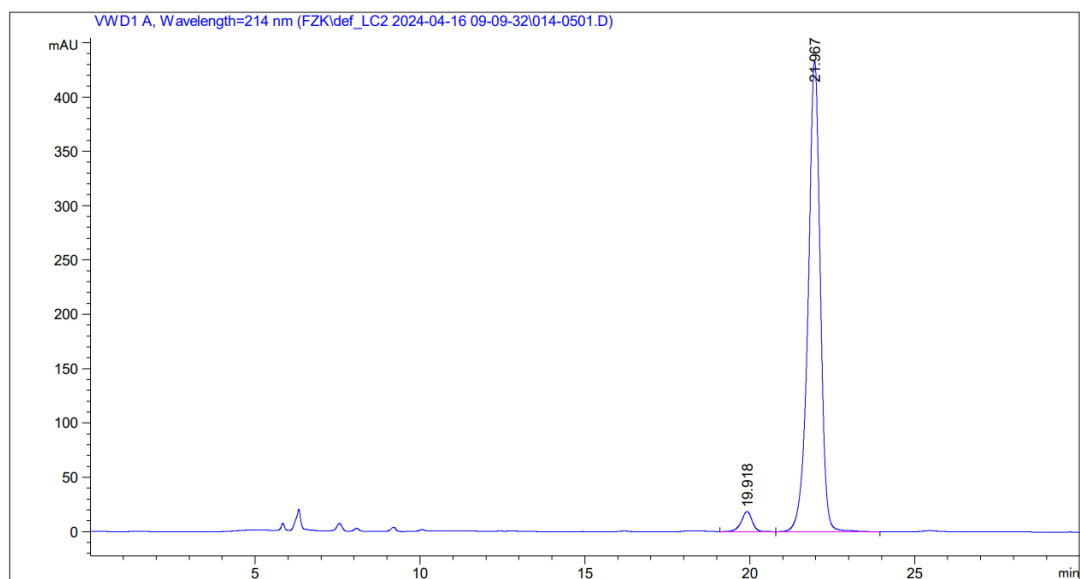

| 峰 # | 保留时间 [min] | 类型 | 峰宽 [min] | 峰面积 [mAU*s] | 峰高 [mAU]  | 峰面积 %   |
|-----|------------|----|----------|-------------|-----------|---------|
| 1   | 19.918     | BB | 0.3493   | 425.53543   | 18.50423  | 3.6910  |
| 2   | 21.967     | BB | 0.3881   | 1.11036e4   | 433.04745 | 96.3090 |

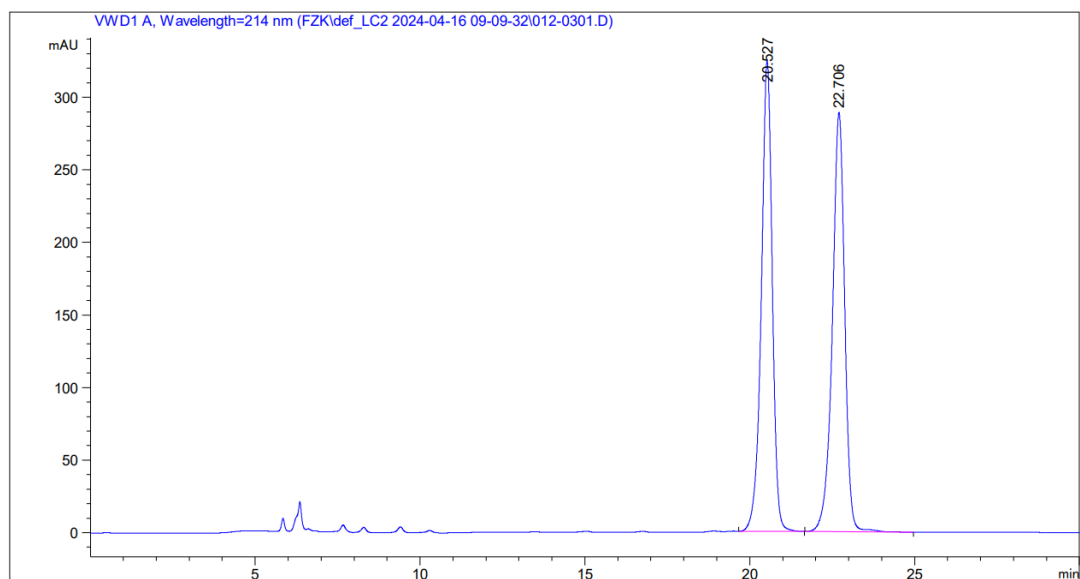

| 峰 # | 保留时间 [min] | 类型 | 峰宽 [min] | 峰面积 [mAU*s] | 峰高 [mAU]  | 峰面积 %   |
|-----|------------|----|----------|-------------|-----------|---------|
| 1   | 20.527     | BB | 0.3496   | 7490.35156  | 324.08426 | 49.8186 |
| 2   | 22.706     | BB | 0.3955   | 7544.89111  | 289.04489 | 50.1814 |

**(R)-3-benzyl-4-(4-bromophenyl)-5-methyleneoxazolidin-2-one (3ea)**

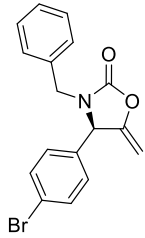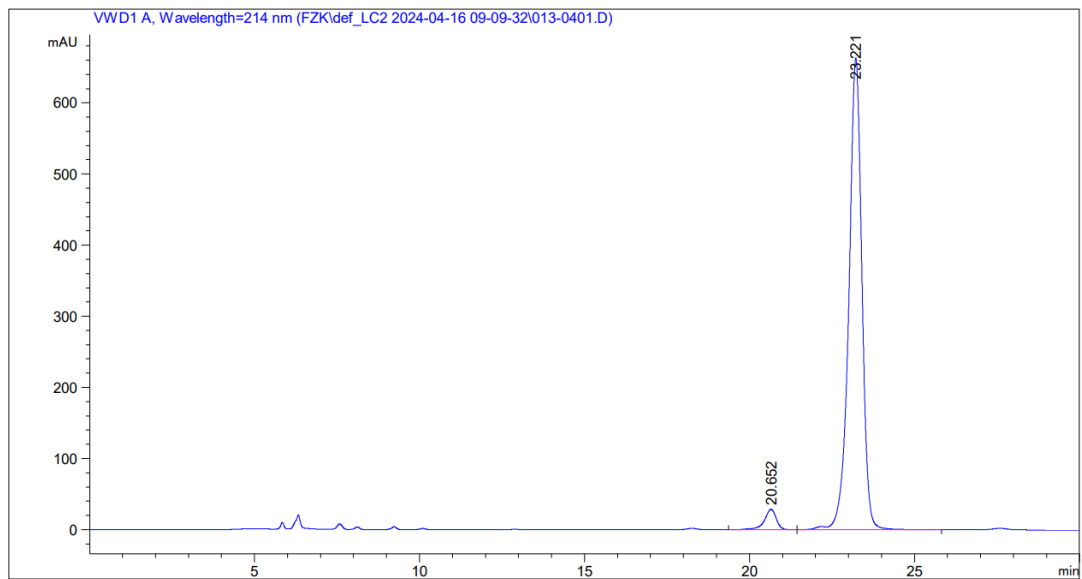

| 峰 # | 保留时间 [min] | 类型   | 峰宽 [min] | 峰面积 [mAU*s] | 峰高 [mAU]  | 峰面积 %   |
|-----|------------|------|----------|-------------|-----------|---------|
| 1   | 20.652     | BB   | 0.3793   | 737.45264   | 28.93831  | 3.8867  |
| 2   | 23.221     | VB R | 0.4122   | 1.82362e4   | 663.18140 | 96.1133 |

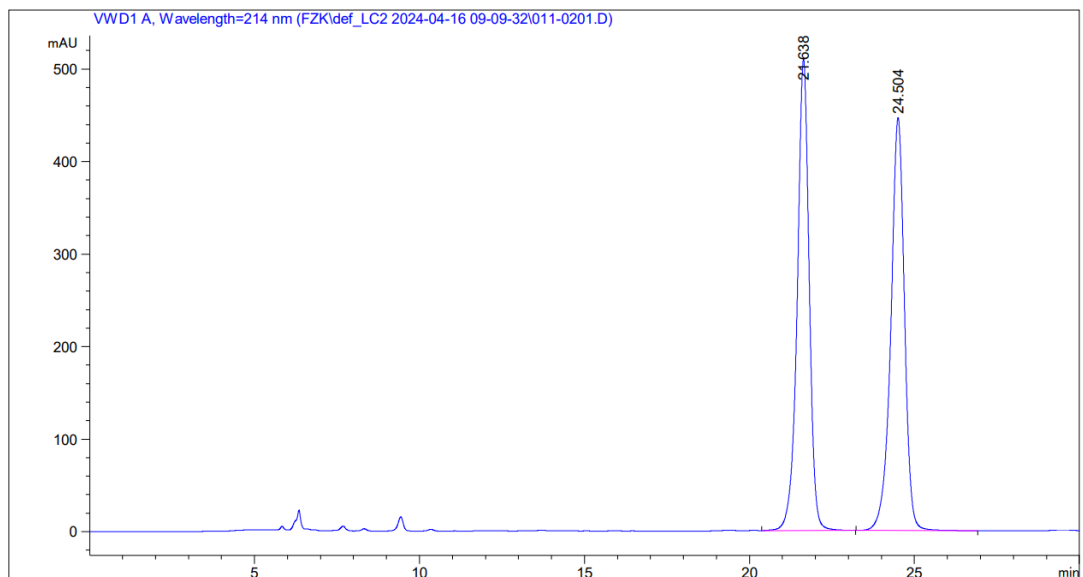

| 峰 # | 保留时间 [min] | 类型 | 峰宽 [min] | 峰面积 [mAU*s] | 峰高 [mAU]  | 峰面积 %   |
|-----|------------|----|----------|-------------|-----------|---------|
| 1   | 21.638     | BB | 0.3809   | 1.28388e4   | 509.67560 | 50.0174 |
| 2   | 24.504     | BB | 0.4345   | 1.28299e4   | 446.13266 | 49.9826 |

**(R)-3-benzyl-5-methylene-4-(4-(trifluoromethyl)phenyl)oxazolidin-2-one (3fa)**

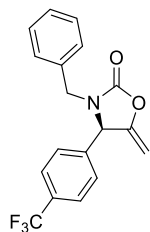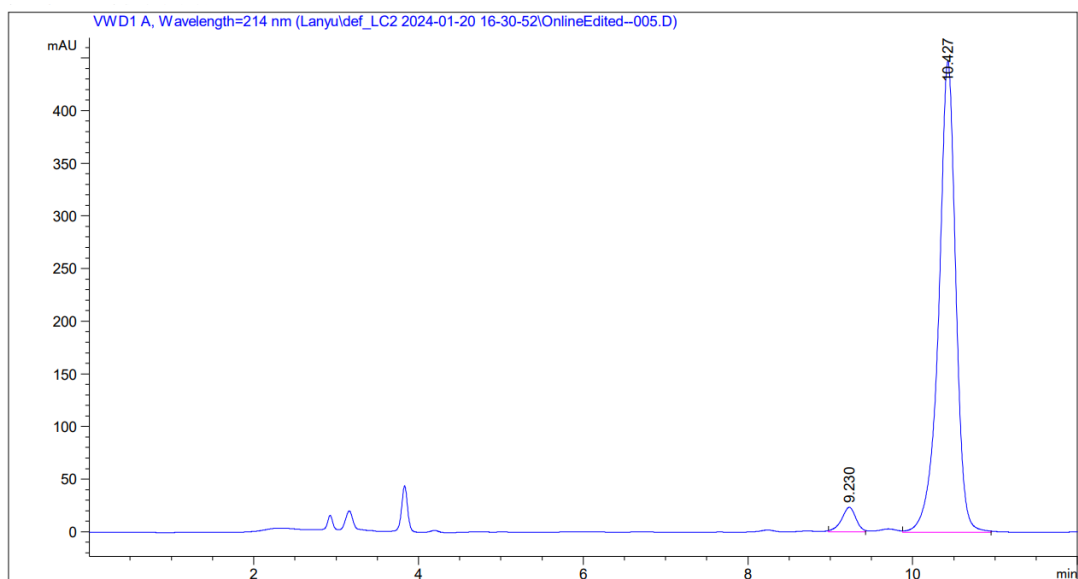

| 峰 # | 保留时间 [min] | 类型   | 峰宽 [min] | 峰面积 [mAU*s] | 峰高 [mAU]  | 峰面积 %   |
|-----|------------|------|----------|-------------|-----------|---------|
| 1   | 9.230      | FM R | 0.2049   | 288.74786   | 23.48664  | 4.2894  |
| 2   | 10.427     | MM R | 0.2400   | 6442.95801  | 447.47797 | 95.7106 |

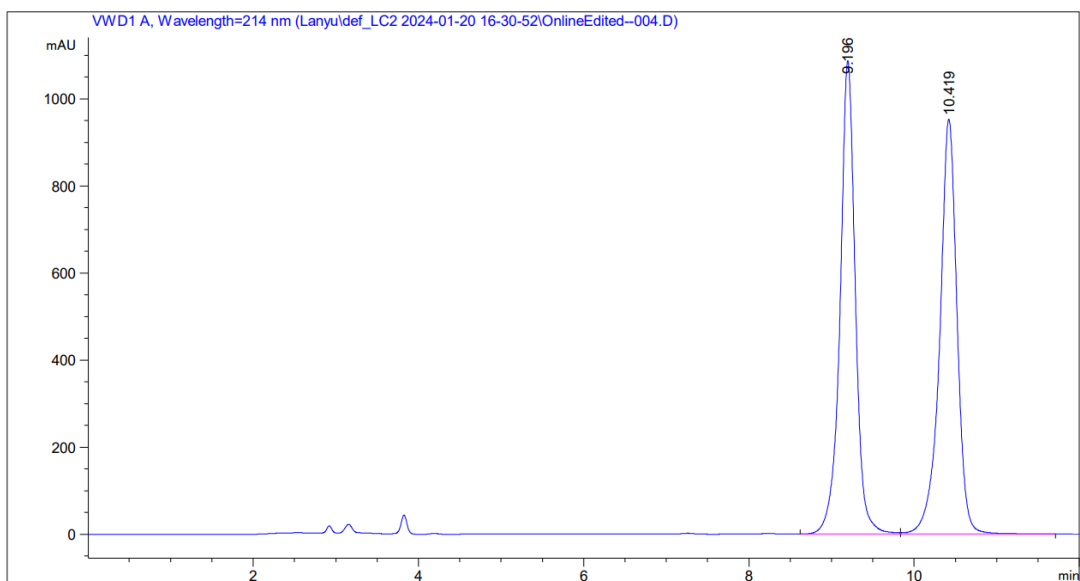

| 峰 # | 保留时间 [min] | 类型 | 峰宽 [min] | 峰面积 [mAU*s] | 峰高 [mAU]   | 峰面积 %   |
|-----|------------|----|----------|-------------|------------|---------|
| 1   | 9.196      | BV | 0.1920   | 1.39791e4   | 1087.08887 | 50.1103 |
| 2   | 10.419     | VB | 0.2184   | 1.39175e4   | 953.14789  | 49.8897 |

**(R)-3-benzyl-5-methylene-4-(4-(trifluoromethoxy)phenyl)oxazolidin-2-one (3ga)**

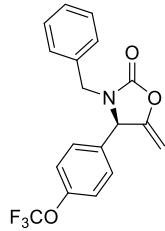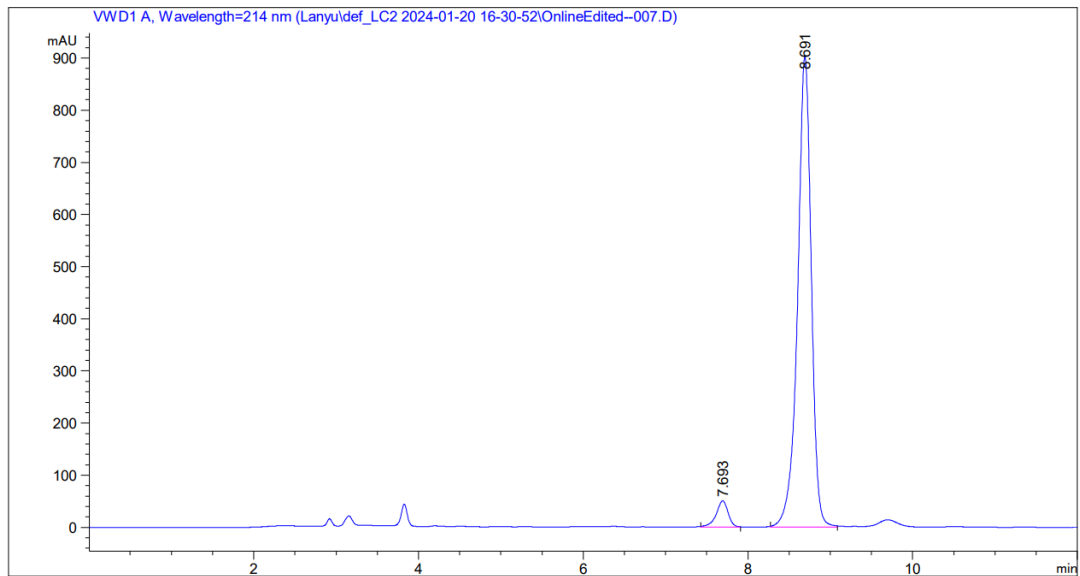

| 峰 # | 保留时间 [min] | 类型   | 峰宽 [min] | 峰面积 [mAU*s] | 峰高 [mAU]  | 峰面积 %   |
|-----|------------|------|----------|-------------|-----------|---------|
| 1   | 7.693      | FM R | 0.1692   | 511.99911   | 50.42985  | 4.6777  |
| 2   | 8.691      | MF R | 0.1926   | 1.04336e4   | 902.96021 | 95.3223 |

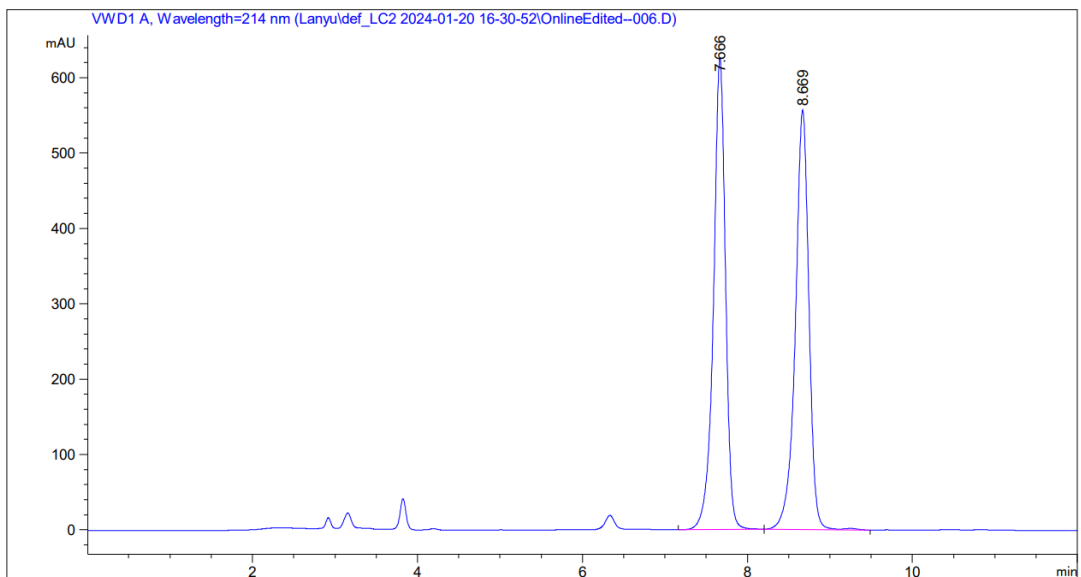

| 峰 # | 保留时间 [min] | 类型   | 峰宽 [min] | 峰面积 [mAU*s] | 峰高 [mAU]  | 峰面积 %   |
|-----|------------|------|----------|-------------|-----------|---------|
| 1   | 7.666      | BB   | 0.1534   | 6344.62988  | 625.07703 | 49.9455 |
| 2   | 8.669      | BV R | 0.1717   | 6358.47412  | 556.62085 | 50.0545 |

**(R)-3-benzyl-5-methylene-4-(4-(pyridin-2-yl)phenyl)oxazolidin-2-one (3ha)**

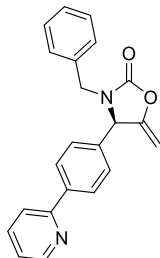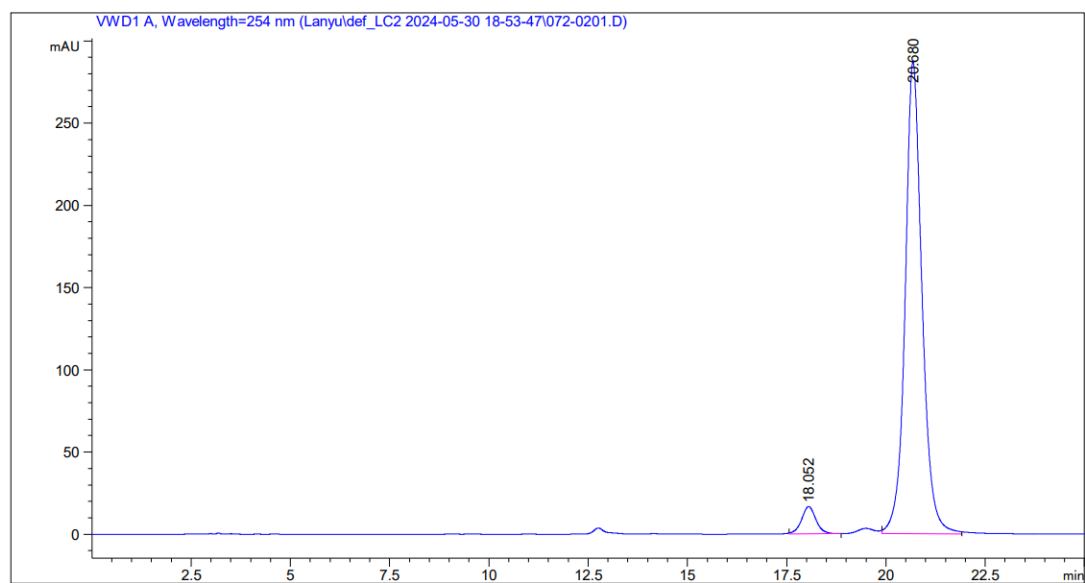

| 峰 # | 保留时间 [min] | 类型   | 峰宽 [min] | 峰面积 [mAU*s] | 峰高 [mAU]  | 峰面积 %   |
|-----|------------|------|----------|-------------|-----------|---------|
| 1   | 18.052     | FM R | 0.4192   | 416.81735   | 16.57242  | 4.6862  |
| 2   | 20.680     | MM R | 0.4923   | 8477.68750  | 286.98917 | 95.3138 |

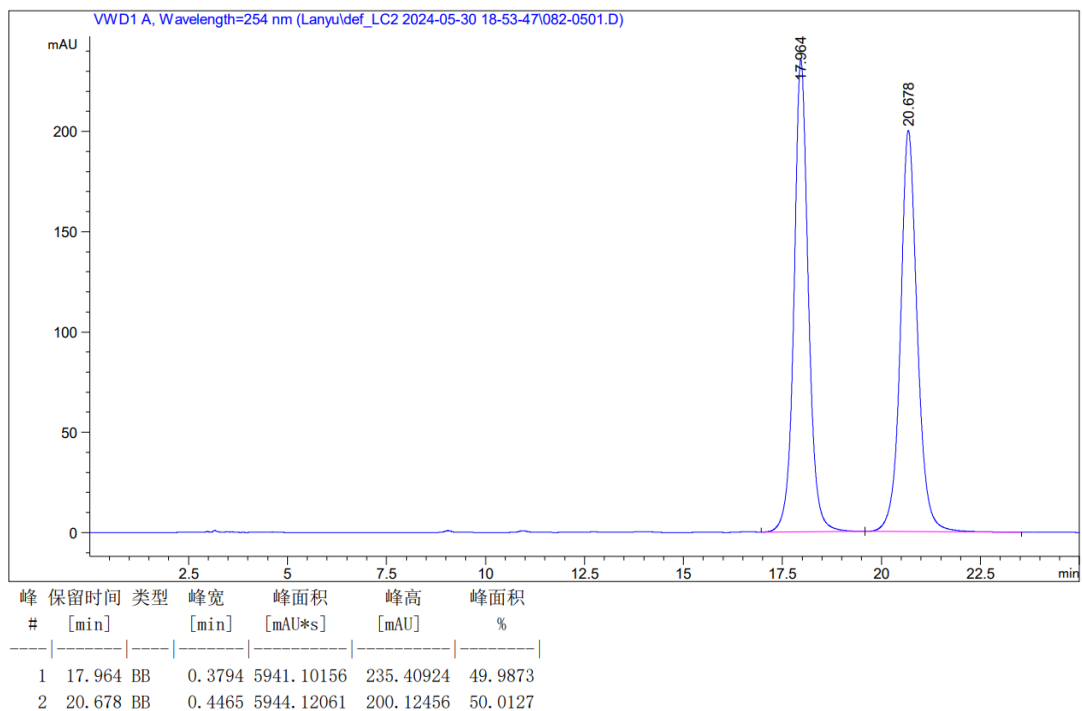

**(R)-3-benzyl-5-methylene-4-(m-tolyl)oxazolidin-2-one (3ia)**

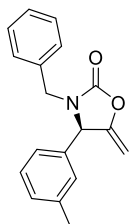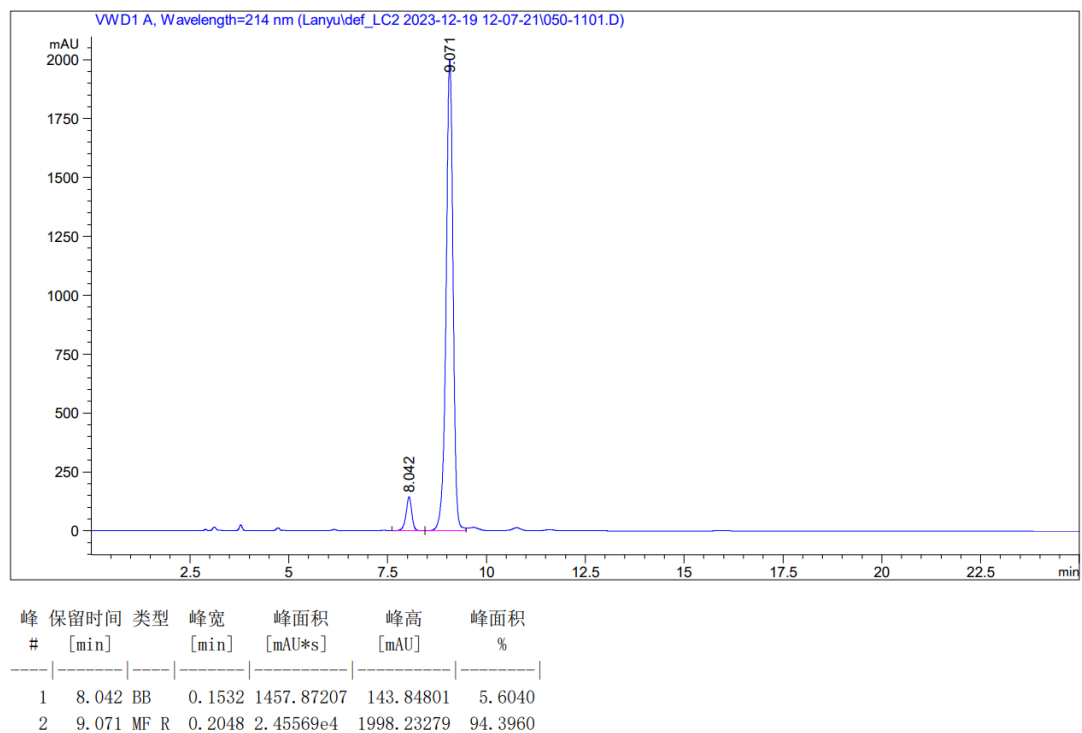

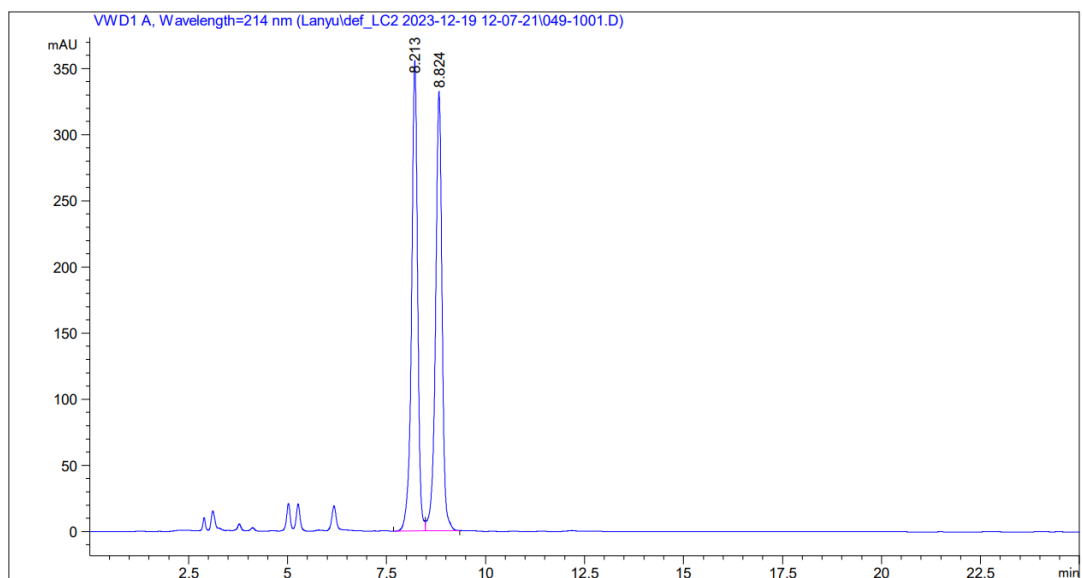

| 峰 # | 保留时间 [min] | 类型 | 峰宽 [min] | 峰面积 [mAU*s] | 峰高 [mAU]  | 峰面积 %   |
|-----|------------|----|----------|-------------|-----------|---------|
| 1   | 8.213      | BV | 0.1603   | 3788.14600  | 355.56665 | 49.9463 |
| 2   | 8.824      | VB | 0.1725   | 3796.29297  | 331.75781 | 50.0537 |

**(R)-3-benzyl-4-(3-chlorophenyl)-5-methyleneoxazolidin-2-one (3ja)**

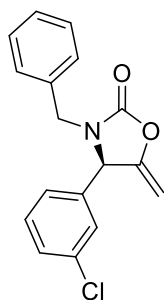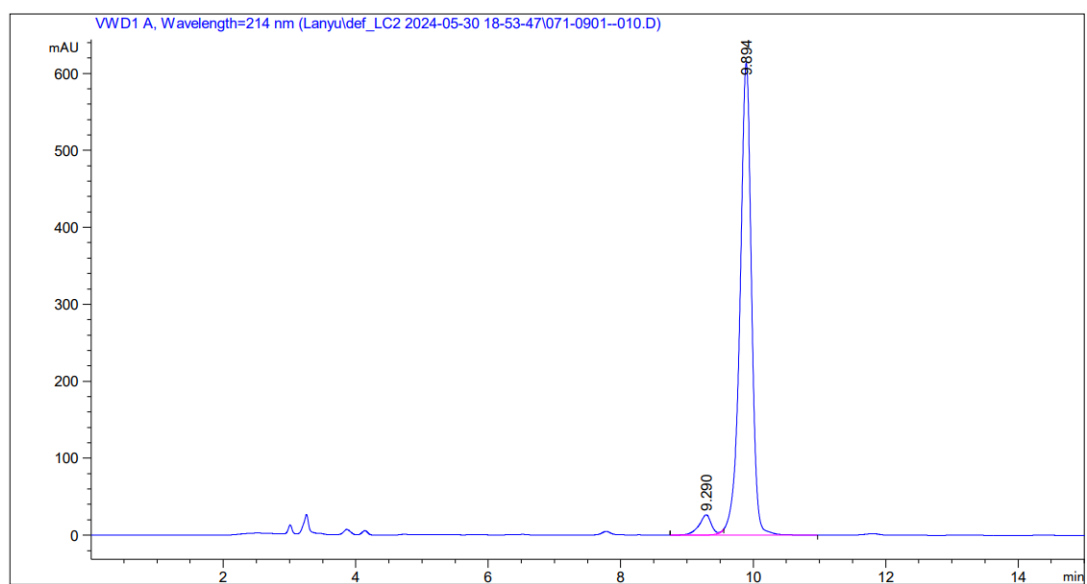

| 峰 # | 保留时间 [min] | 类型   | 峰宽 [min] | 峰面积 [mAU*s] | 峰高 [mAU]  | 峰面积 %   |
|-----|------------|------|----------|-------------|-----------|---------|
| 1   | 9.290      | BV E | 0.1880   | 337.98257   | 26.28653  | 4.3455  |
| 2   | 9.894      | VB R | 0.1835   | 7439.68994  | 613.56873 | 95.6545 |

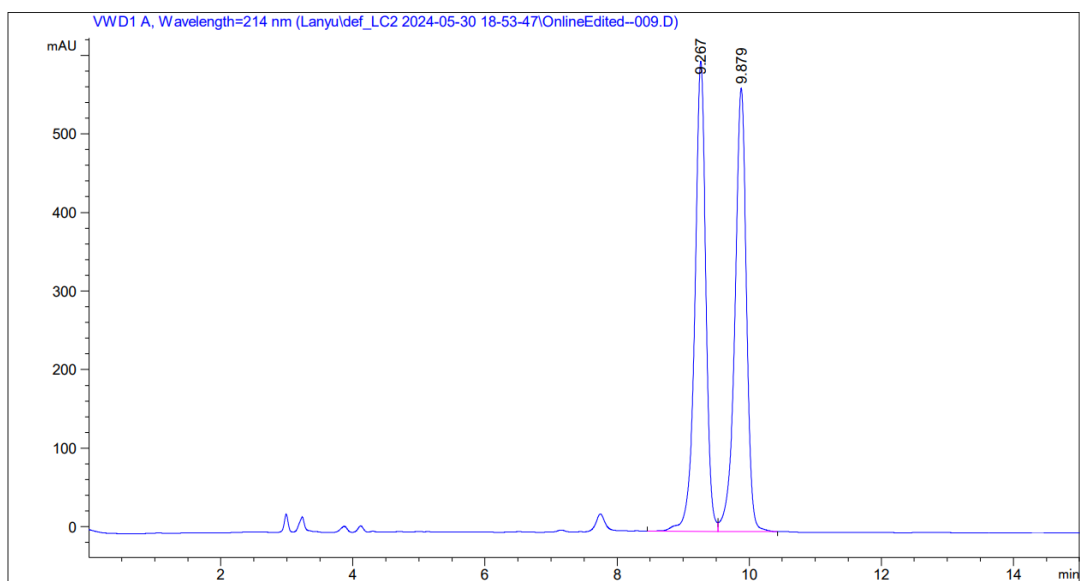

| 峰 # | 保留时间 [min] | 类型 | 峰宽 [min] | 峰面积 [mAU*s] | 峰高 [mAU]  | 峰面积 %   |
|-----|------------|----|----------|-------------|-----------|---------|
| 1   | 9.267      | BV | 0.1733   | 6888.60400  | 598.24030 | 50.2113 |
| 2   | 9.879      | VB | 0.1833   | 6830.62646  | 564.08008 | 49.7887 |

**(R)-3-benzyl-5-methylene-4-(3,4,5-trimethoxyphenyl)oxazolidin-2-one (3ka)**

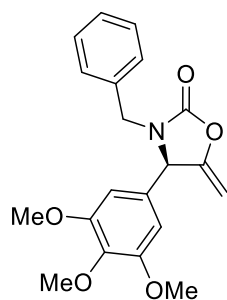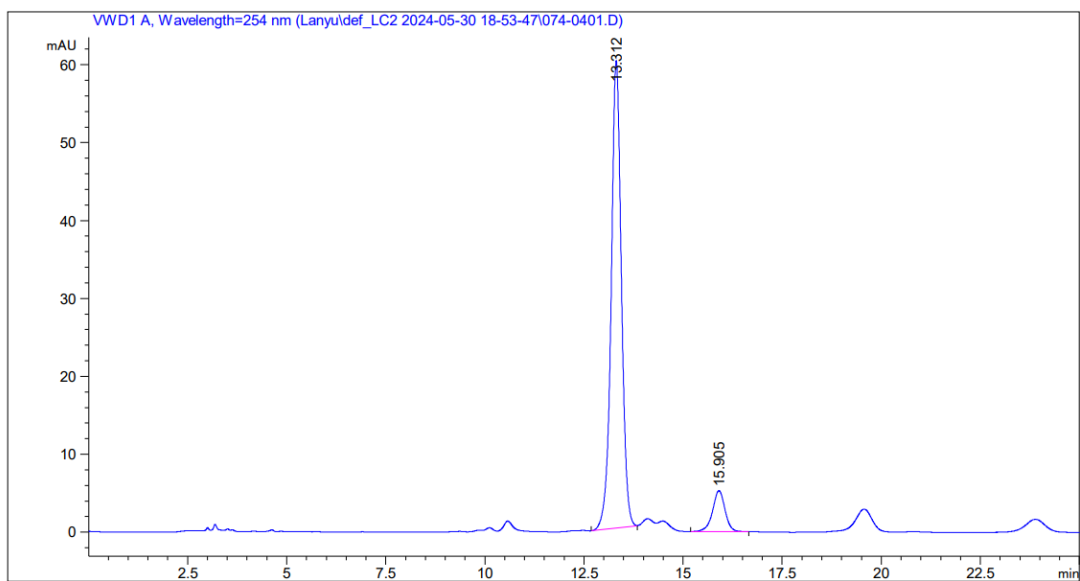

| 峰 # | 保留时间 [min] | 类型 | 峰宽 [min] | 峰面积 [mAU*s] | 峰高 [mAU] | 峰面积 %   |
|-----|------------|----|----------|-------------|----------|---------|
| 1   | 13.312     | BB | 0.2706   | 1072.63049  | 59.98258 | 90.3626 |
| 2   | 15.905     | BB | 0.3301   | 114.39840   | 5.25269  | 9.6374  |



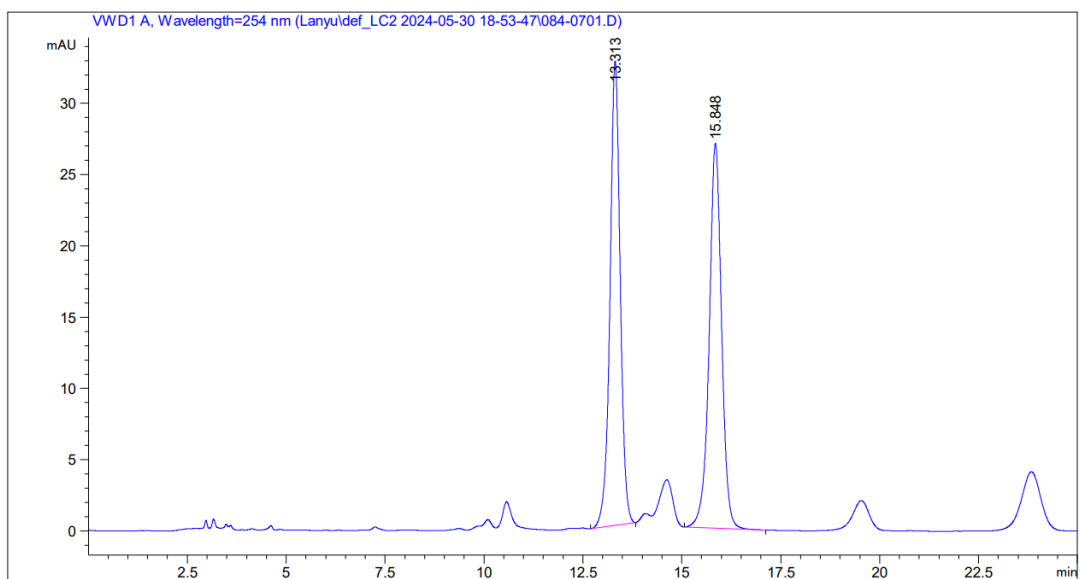

| 峰 # | 保留时间 [min] | 类型 | 峰宽 [min] | 峰面积 [mAU*s] | 峰高 [mAU] | 峰面积 %   |
|-----|------------|----|----------|-------------|----------|---------|
| 1   | 13.313     | BB | 0.2710   | 583.93384   | 32.59280 | 49.8085 |
| 2   | 15.848     | BB | 0.3302   | 588.42401   | 27.00689 | 50.1915 |

**(R)-3-(4-methylbenzyl)-5-methylene-4-phenyloxazolidin-2-one (3ab)**

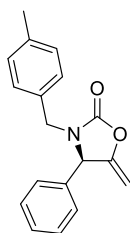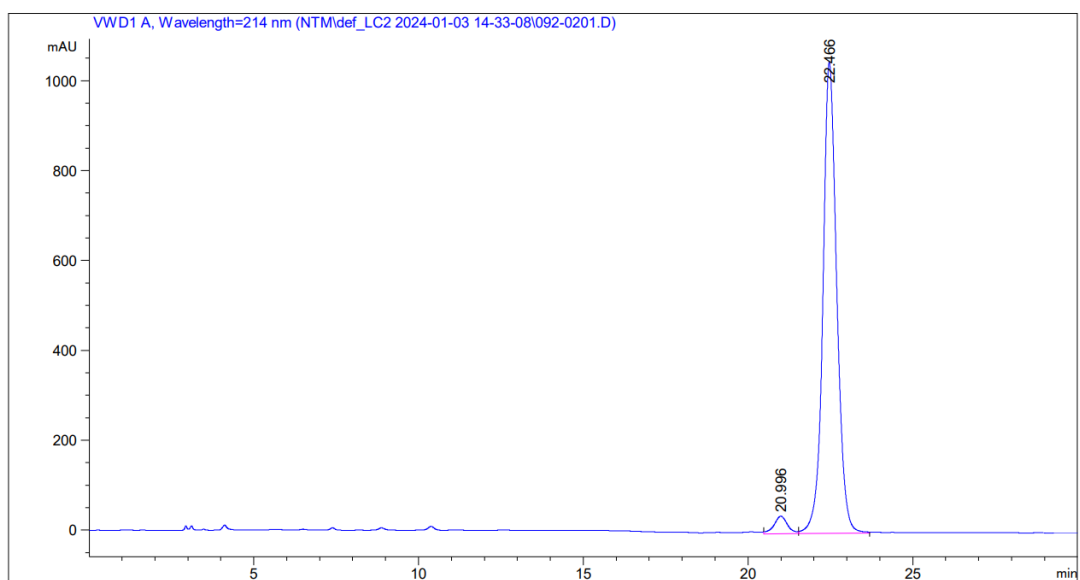

| 峰 # | 保留时间 [min] | 类型   | 峰宽 [min] | 峰面积 [mAU*s] | 峰高 [mAU]   | 峰面积 %   |
|-----|------------|------|----------|-------------|------------|---------|
| 1   | 20.996     | MF R | 0.4787   | 1126.14514  | 39.21156   | 3.5460  |
| 2   | 22.466     | FM R | 0.4871   | 3.06320e4   | 1048.18481 | 96.4540 |

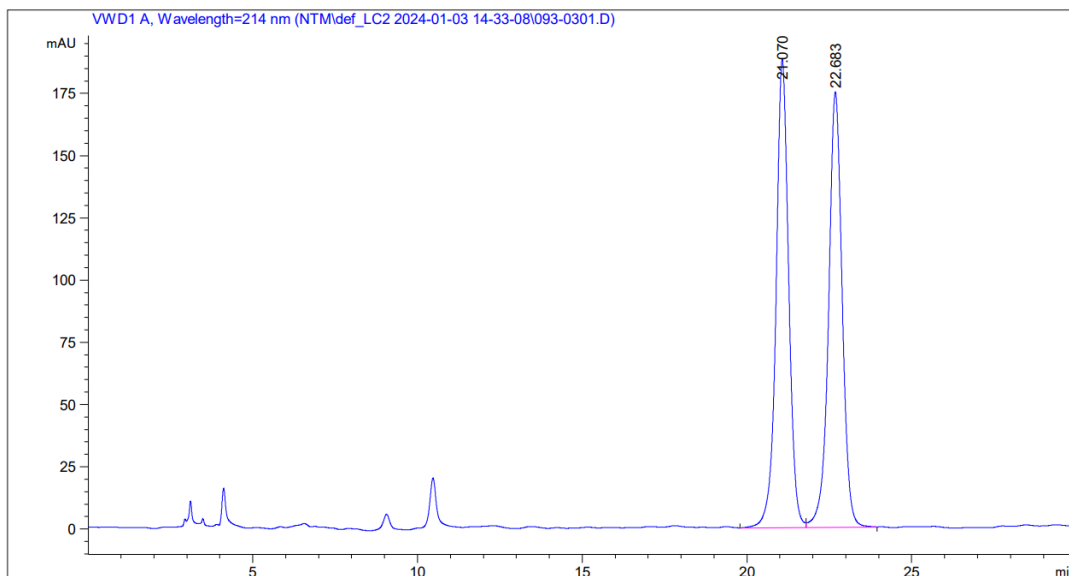

| 峰 # | 保留时间 [min] | 类型 | 峰宽 [min] | 峰面积 [mAU*s] | 峰高 [mAU]  | 峰面积 %   |
|-----|------------|----|----------|-------------|-----------|---------|
| 1   | 21.070     | BV | 0.4034   | 5009.94629  | 188.32059 | 50.0070 |
| 2   | 22.683     | VB | 0.4341   | 5008.54346  | 174.87437 | 49.9930 |

**(R)-3-(4-(tert-butyl)benzyl)-5-methylene-4-phenyloxazolidin-2-one (3ac)**

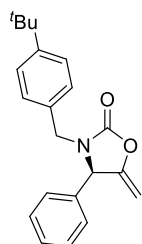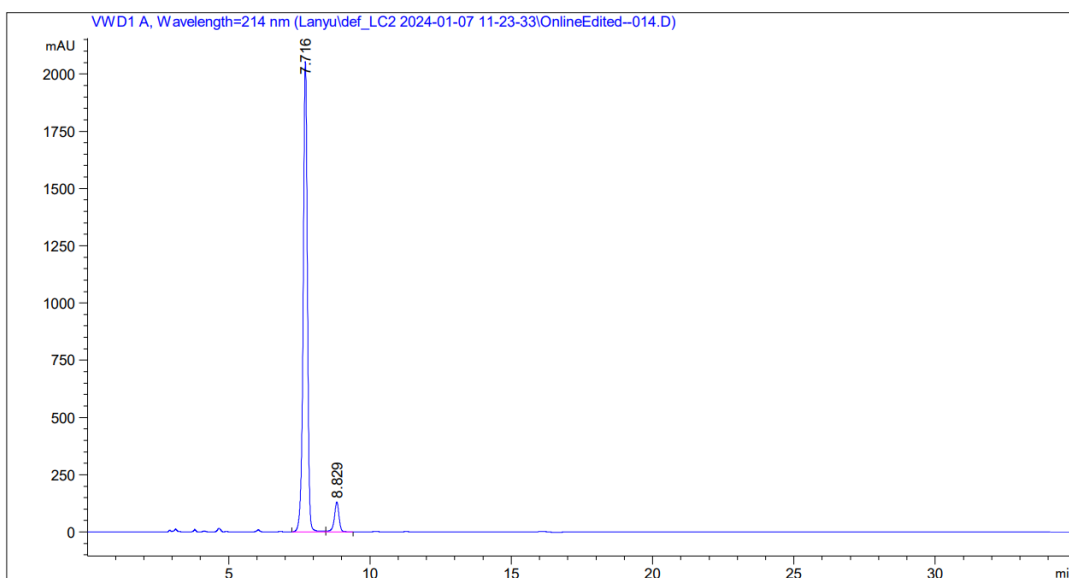

| 峰 # | 保留时间 [min] | 类型   | 峰宽 [min] | 峰面积 [mAU*s] | 峰高 [mAU]   | 峰面积 %   |
|-----|------------|------|----------|-------------|------------|---------|
| 1   | 7.716      | BV R | 0.1594   | 2.14151e4   | 2053.96045 | 93.4986 |
| 2   | 8.829      | VB   | 0.1735   | 1489.07983  | 130.17923  | 6.5014  |

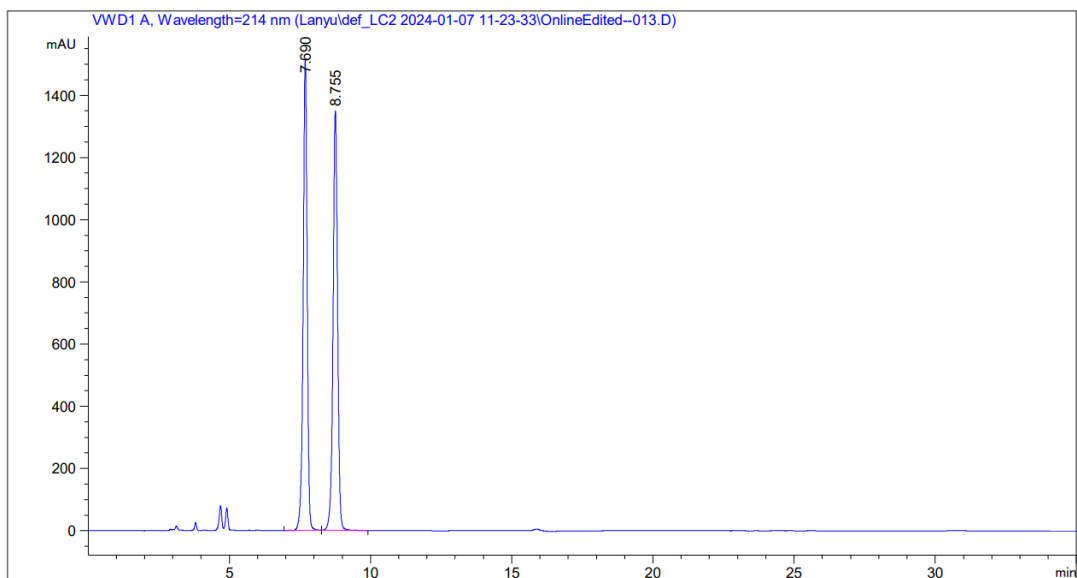

| 峰 # | 保留时间 [min] | 类型   | 峰宽 [min] | 峰面积 [mAU*s] | 峰高 [mAU]   | 峰面积 %   |
|-----|------------|------|----------|-------------|------------|---------|
| 1   | 7.690      | VB R | 0.1504   | 1.49630e4   | 1513.07129 | 49.8329 |
| 2   | 8.755      | BB   | 0.1692   | 1.50633e4   | 1349.99536 | 50.1671 |

**(R)-3-(4-fluorobenzyl)-5-methylene-4-phenyloxazolidin-2-one (3ad)**

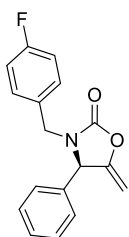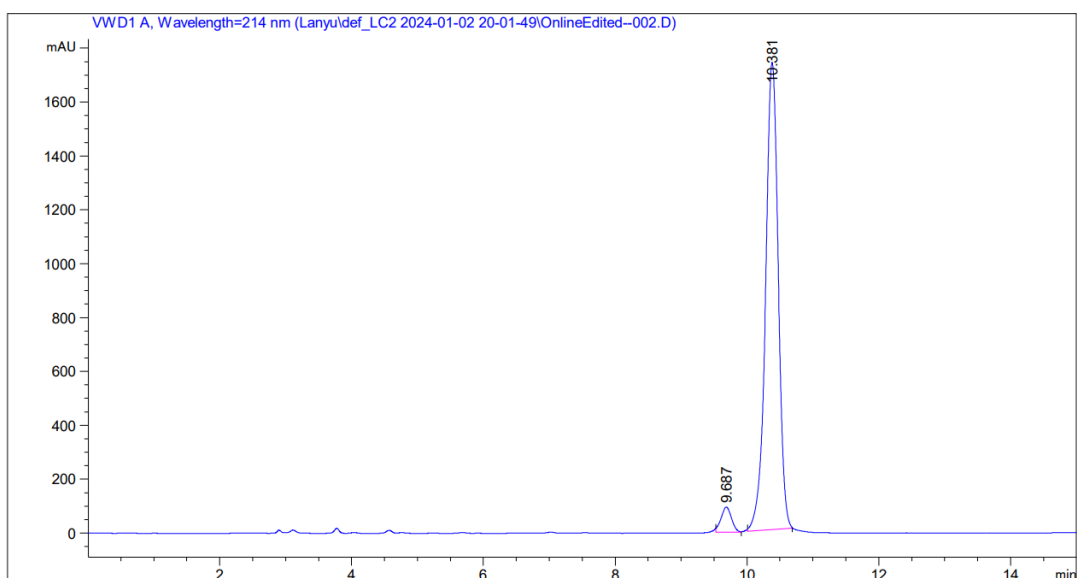

| 峰 # | 保留时间 [min] | 类型   | 峰宽 [min] | 峰面积 [mAU*s] | 峰高 [mAU]   | 峰面积 %   |
|-----|------------|------|----------|-------------|------------|---------|
| 1   | 9.687      | MM R | 0.1830   | 1016.01324  | 92.54243   | 4.2305  |
| 2   | 10.381     | MM R | 0.2211   | 2.30003e4   | 1734.13989 | 95.7695 |

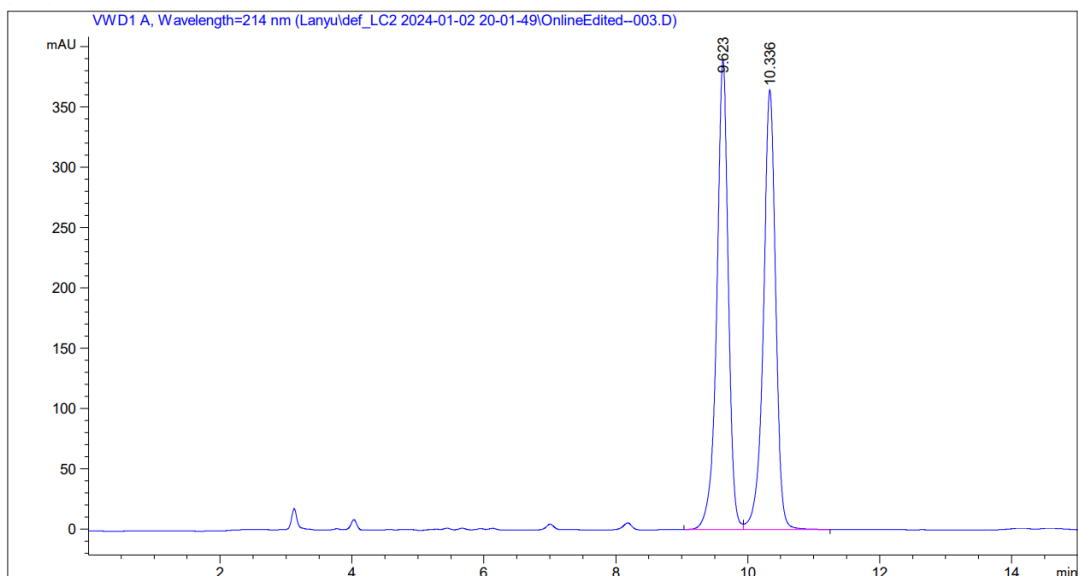

| 峰 # | 保留时间 [min] | 类型 | 峰宽 [min] | 峰面积 [mAU*s] | 峰高 [mAU]  | 峰面积 %   |
|-----|------------|----|----------|-------------|-----------|---------|
| 1   | 9.623      | BV | 0.1839   | 4732.36328  | 389.09042 | 50.2059 |
| 2   | 10.336     | VB | 0.1954   | 4693.55322  | 364.19611 | 49.7941 |

**(R)-3-(4-bromobenzyl)-5-methylene-4-phenyloxazolidin-2-one (3ae)**

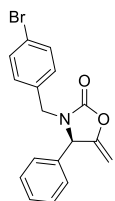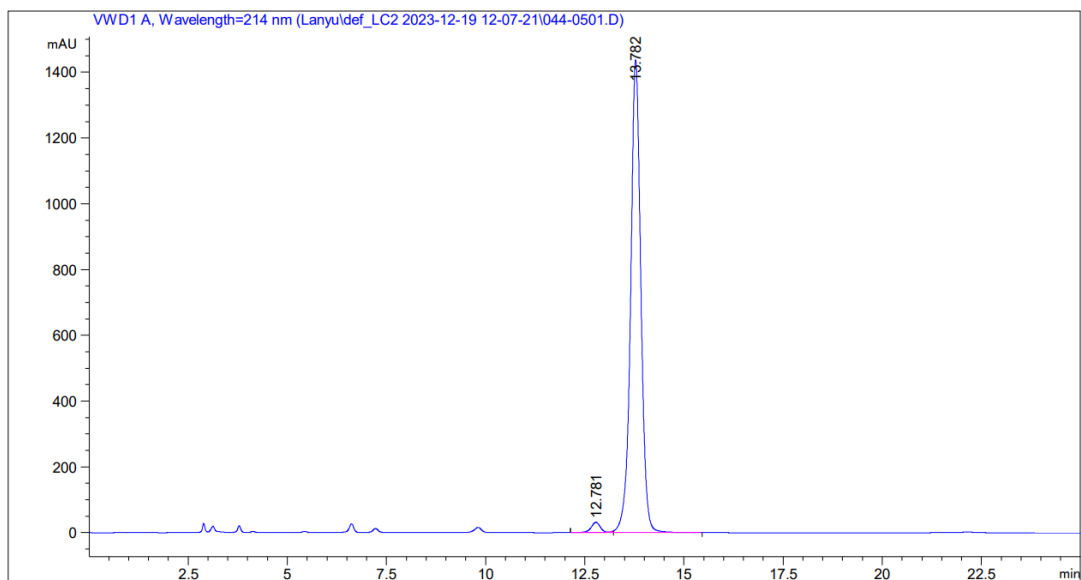

| 峰 # | 保留时间 [min] | 类型   | 峰宽 [min] | 峰面积 [mAU*s] | 峰高 [mAU]   | 峰面积 %   |
|-----|------------|------|----------|-------------|------------|---------|
| 1   | 12.781     | BV E | 0.2471   | 511.35703   | 31.38836   | 1.9448  |
| 2   | 13.782     | VB R | 0.2713   | 2.57822e4   | 1437.10278 | 98.0552 |

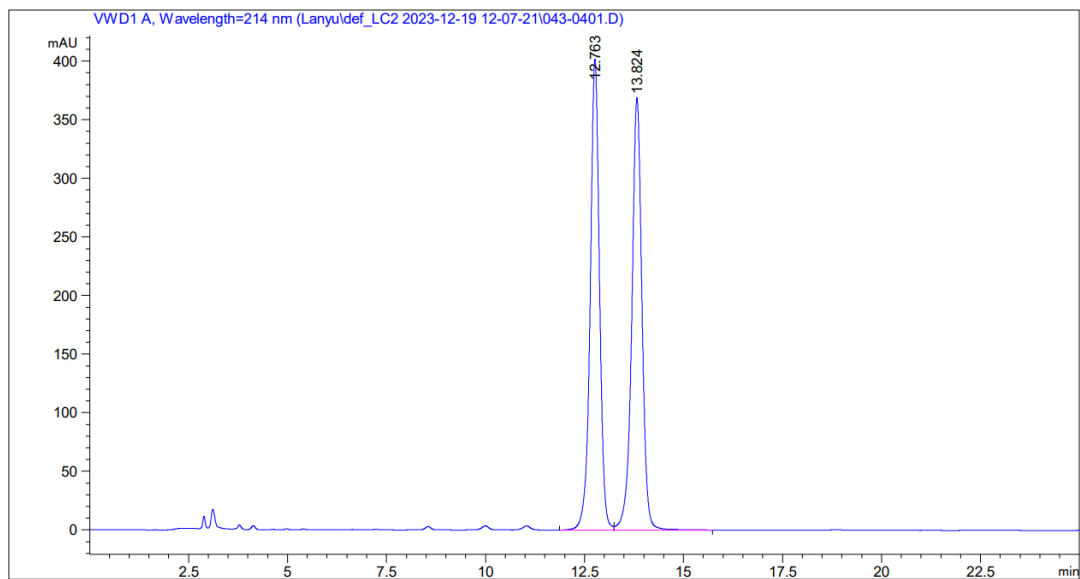

| 峰 # | 保留时间 [min] | 类型 | 峰宽 [min] | 峰面积 [mAU*s] | 峰高 [mAU]  | 峰面积 %   |
|-----|------------|----|----------|-------------|-----------|---------|
| 1   | 12.763     | BV | 0.2472   | 6551.87891  | 401.98462 | 49.8397 |
| 2   | 13.824     | VB | 0.2705   | 6594.01904  | 368.88678 | 50.1603 |

**(R)-3-(4-iodobenzyl)-5-methylene-4-phenyloxazolidin-2-one (3af)**

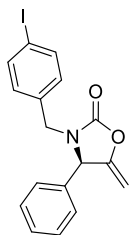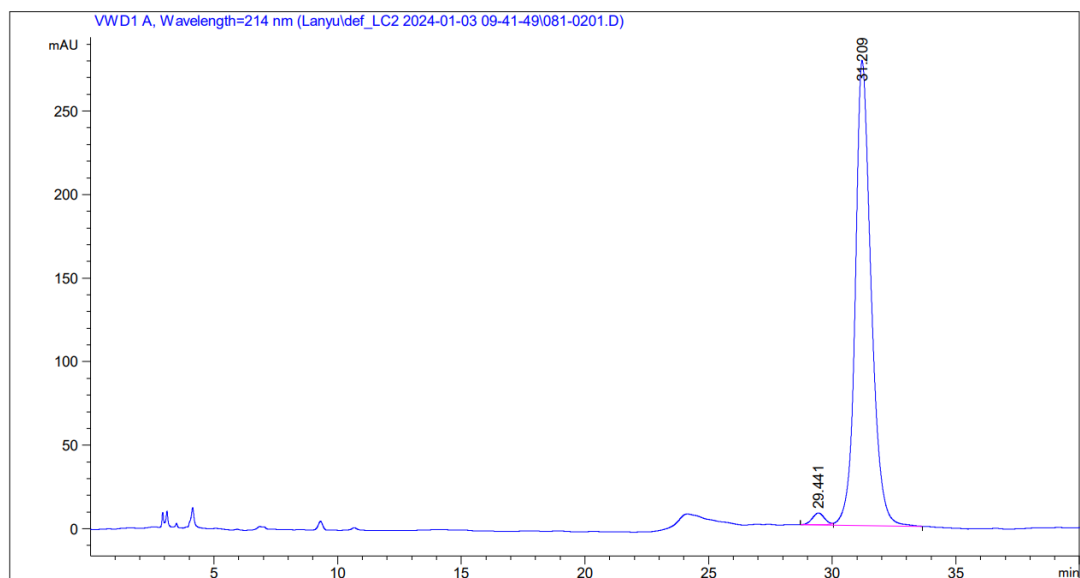

| 峰 # | 保留时间 [min] | 类型   | 峰宽 [min] | 峰面积 [mAU*s] | 峰高 [mAU]  | 峰面积 %   |
|-----|------------|------|----------|-------------|-----------|---------|
| 1   | 29.441     | BV E | 0.5206   | 237.53252   | 7.07749   | 1.8813  |
| 2   | 31.209     | VB R | 0.6664   | 1.23882e4   | 278.23956 | 98.1187 |

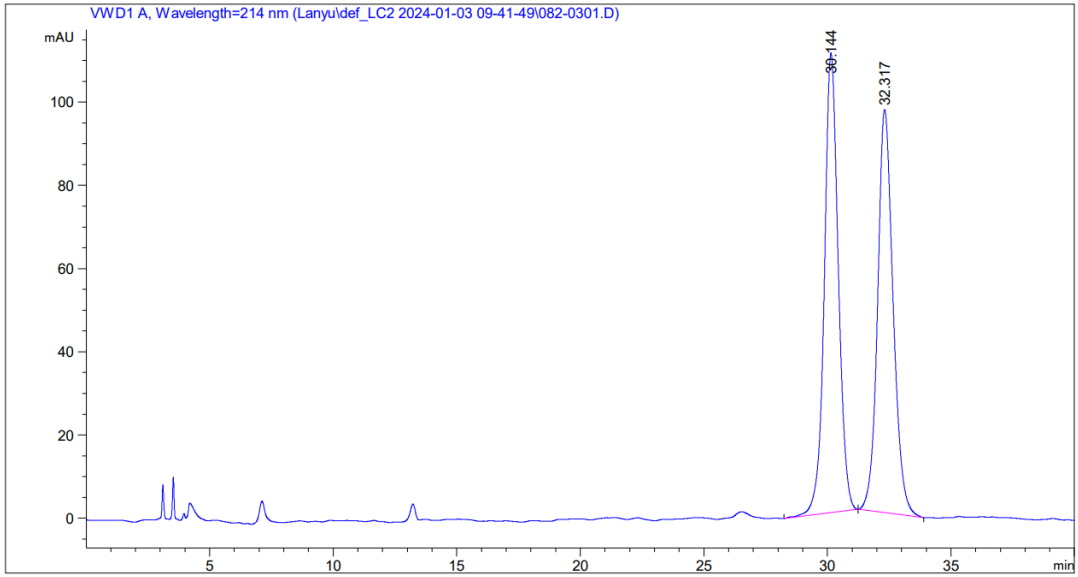

| 峰 # | 保留时间 [min] | 类型 | 峰宽 [min] | 峰面积 [mAU*s] | 峰高 [mAU]  | 峰面积 %   |
|-----|------------|----|----------|-------------|-----------|---------|
| 1   | 30.144     | BB | 0.5952   | 4329.61084  | 110.47592 | 50.6211 |
| 2   | 32.317     | BB | 0.6575   | 4223.36865  | 96.89544  | 49.3789 |

**(R)-4-((5-methylene-2-oxo-4-phenyloxazolidin-3-yl)methyl)benzonitrile (3ag)**

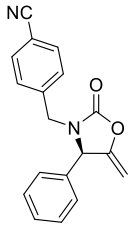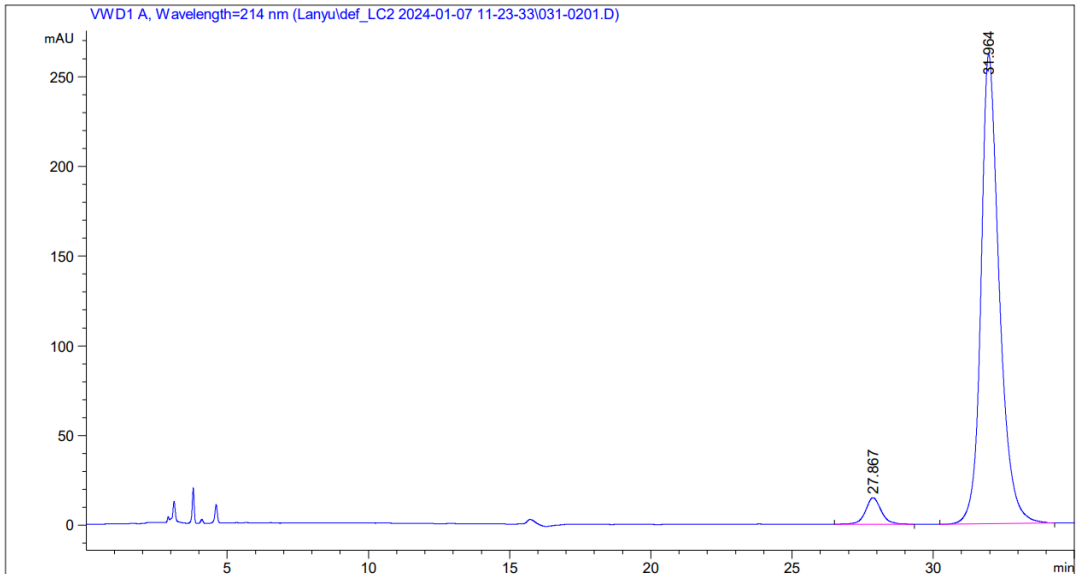

| 峰 # | 保留时间 [min] | 类型 | 峰宽 [min] | 峰面积 [mAU*s] | 峰高 [mAU]  | 峰面积 %   |
|-----|------------|----|----------|-------------|-----------|---------|
| 1   | 27.867     | BB | 0.5806   | 575.77472   | 14.80778  | 4.6406  |
| 2   | 31.964     | BB | 0.6774   | 1.18315e4   | 261.73975 | 95.3594 |

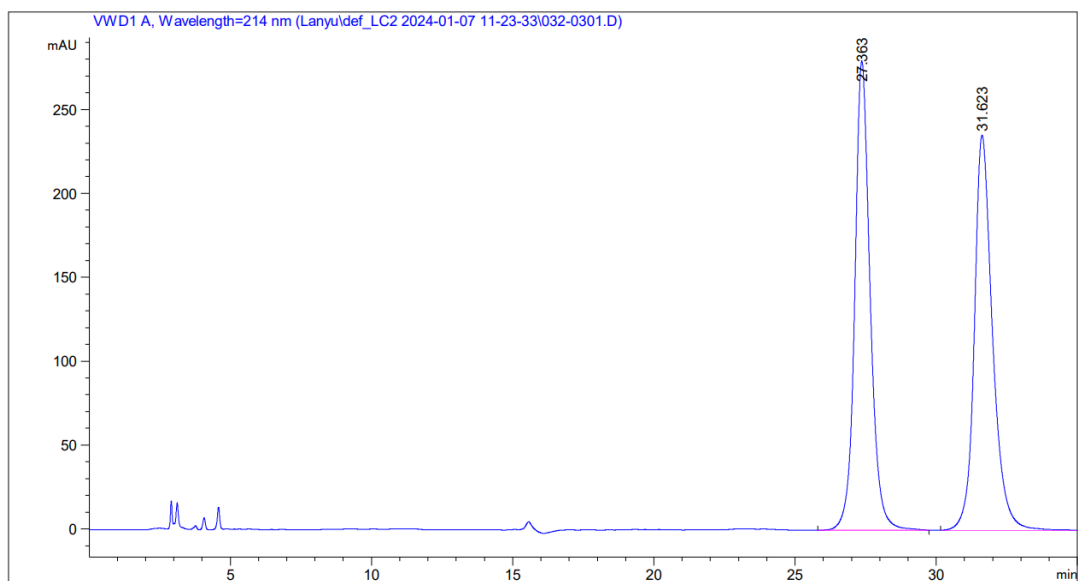

| 峰 # | 保留时间 [min] | 类型  | 峰宽 [min] | 峰面积 [mAU*s] | 峰高 [mAU]  | 峰面积 %   |
|-----|------------|-----|----------|-------------|-----------|---------|
| 1   | 27.363     | BB  | 0.5649   | 1.05433e4   | 279.64755 | 49.9882 |
| 2   | 31.623     | BBA | 0.6688   | 1.05483e4   | 235.40474 | 50.0118 |

**(R)-3-(3-bromobenzyl)-5-methylene-4-phenyloxazolidin-2-one (3ah)**

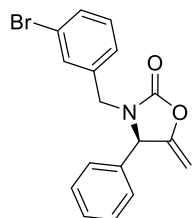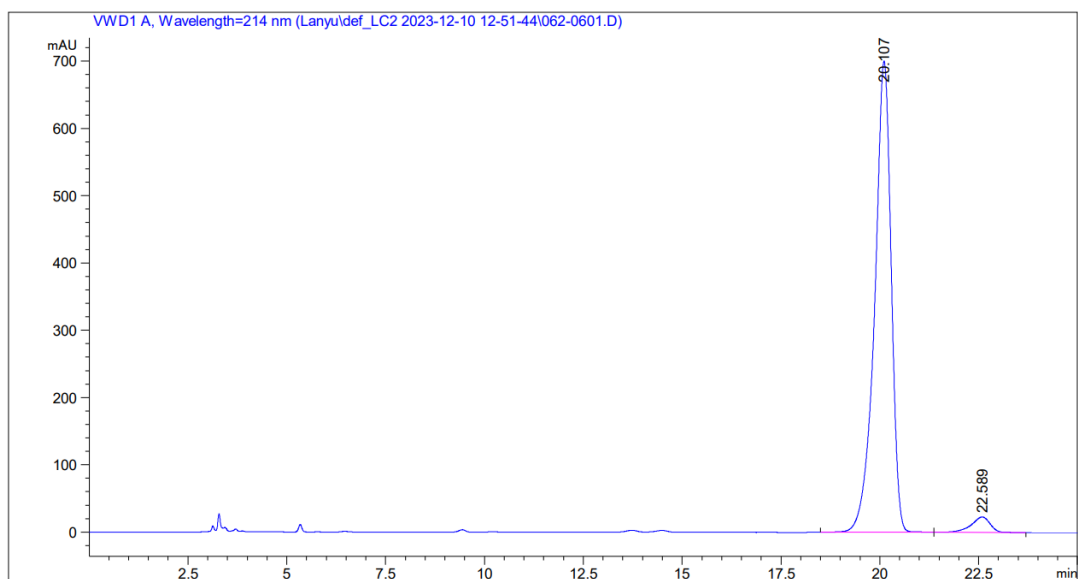

| 峰 # | 保留时间 [min] | 类型 | 峰宽 [min] | 峰面积 [mAU*s] | 峰高 [mAU]  | 峰面积 %   |
|-----|------------|----|----------|-------------|-----------|---------|
| 1   | 20.107     | BB | 0.4350   | 2.03459e4   | 700.22131 | 96.4444 |
| 2   | 22.589     | BB | 0.4896   | 750.09082   | 22.87080  | 3.5556  |

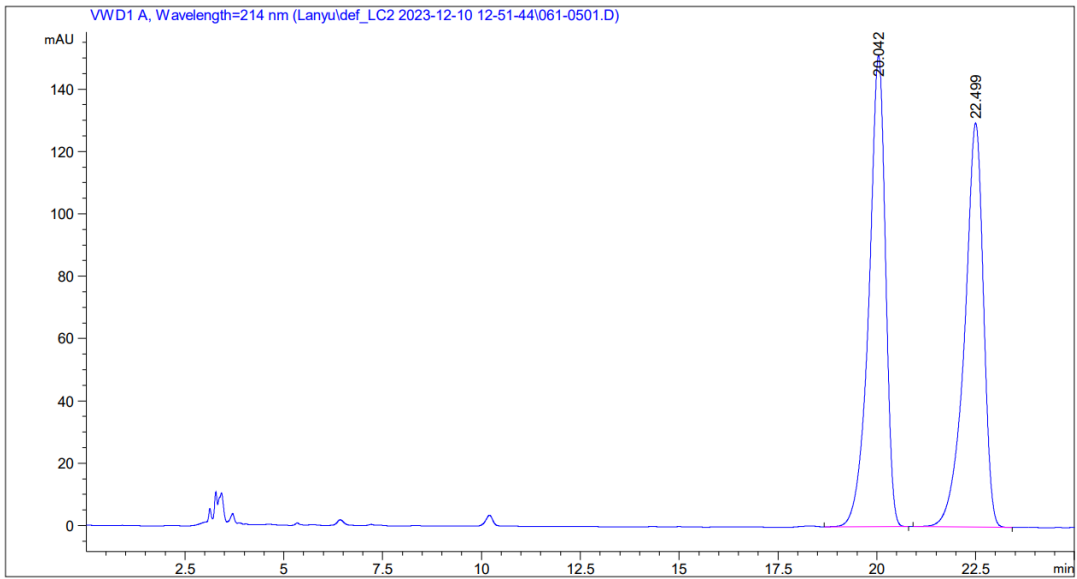

| 峰 # | 保留时间 [min] | 类型 | 峰宽 [min] | 峰面积 [mAU*s] | 峰高 [mAU]  | 峰面积 %   |
|-----|------------|----|----------|-------------|-----------|---------|
| 1   | 20.042     | BB | 0.4378   | 4402.47119  | 151.17401 | 50.6201 |
| 2   | 22.499     | BB | 0.4946   | 4294.60498  | 129.60054 | 49.3799 |

**(R)-3-(3-iodobenzyl)-5-methylene-4-phenyloxazolidin-2-one (3ai)**

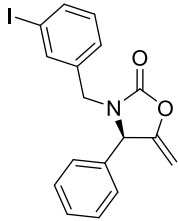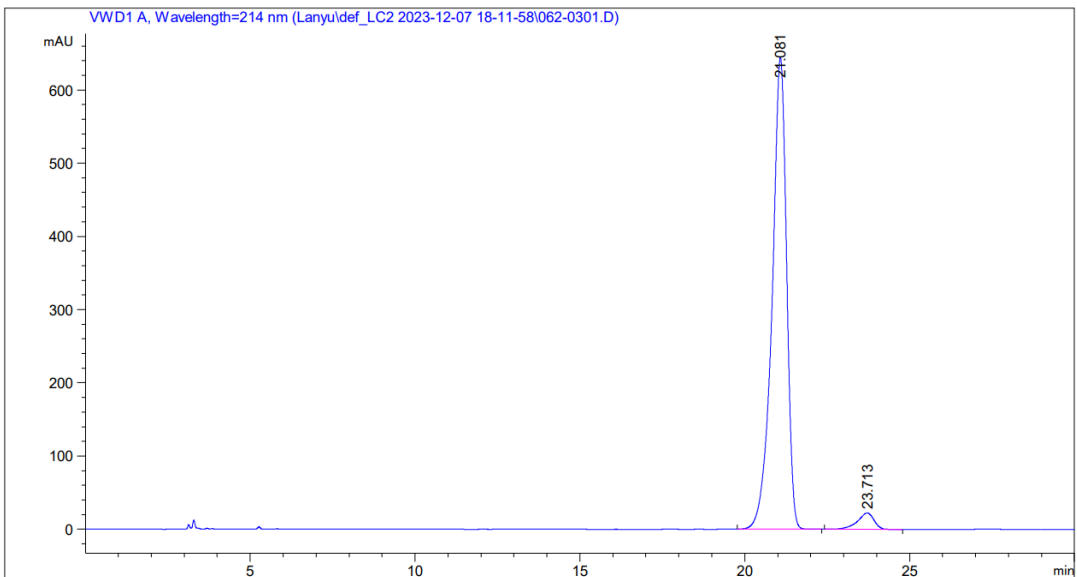



| 峰 # | 保留时间 [min] | 类型 | 峰宽 [min] | 峰面积 [mAU*s] | 峰高 [mAU]  | 峰面积 %   |
|-----|------------|----|----------|-------------|-----------|---------|
| 1   | 21.081     | BB | 0.4570   | 1.96741e4   | 644.75323 | 96.2050 |
| 2   | 23.713     | BB | 0.5188   | 776.07581   | 22.31061  | 3.7950  |

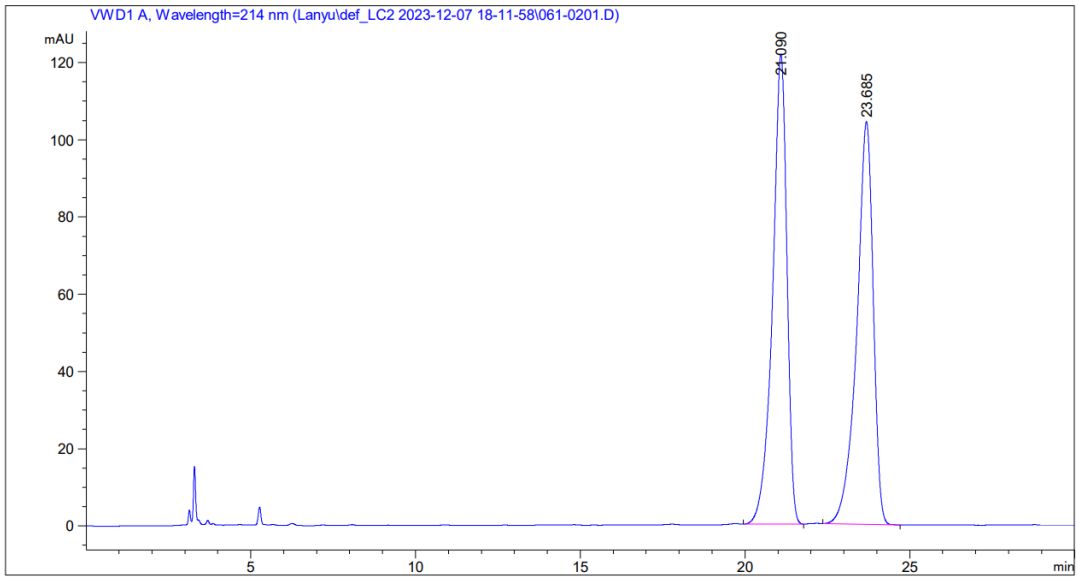

| 峰 # | 保留时间 [min] | 类型 | 峰宽 [min] | 峰面积 [mAU*s] | 峰高 [mAU]  | 峰面积 %   |
|-----|------------|----|----------|-------------|-----------|---------|
| 1   | 21.090     | BB | 0.4537   | 3674.92554  | 121.56779 | 50.3526 |
| 2   | 23.685     | BB | 0.5182   | 3623.45410  | 104.32997 | 49.6474 |

**(R)-5-methylene-3-(3-nitrobenzyl)-4-phenyloxazolidin-2-one (3aj)**

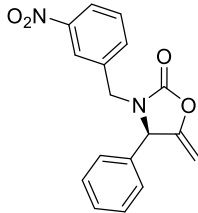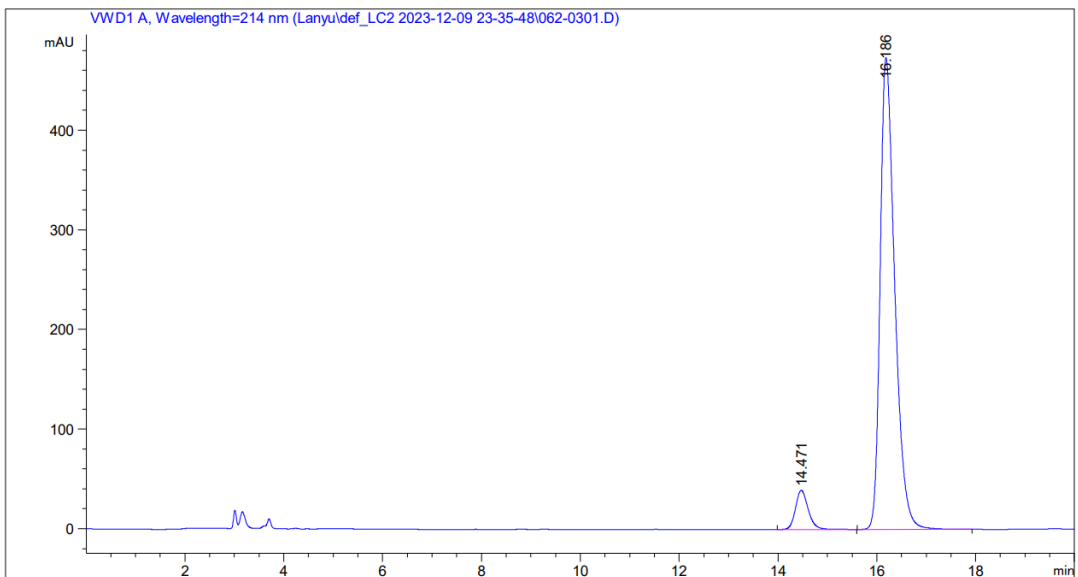



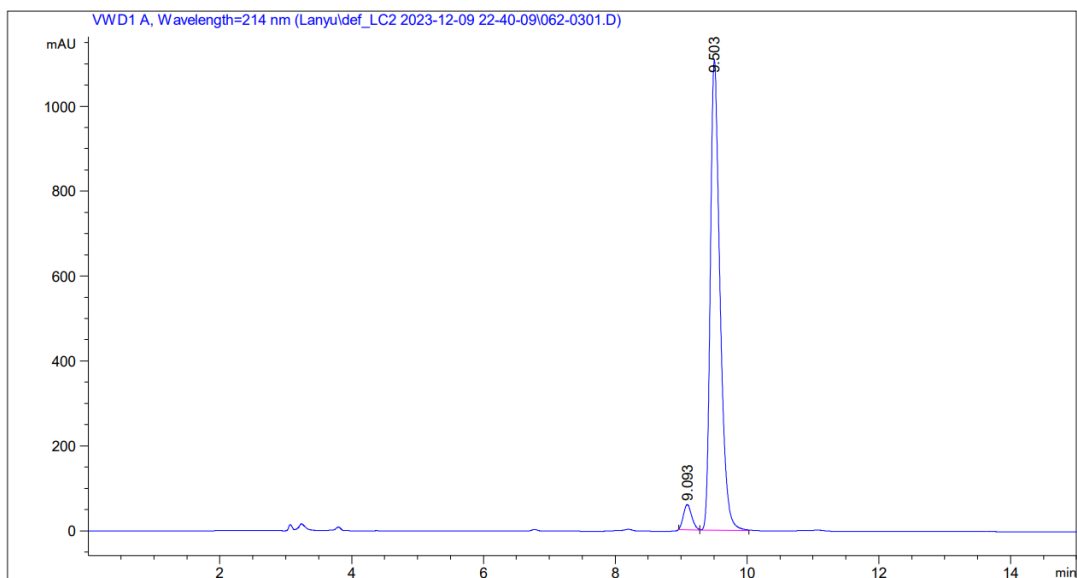

| 峰 # | 保留时间 [min] | 类型   | 峰宽 [min] | 峰面积 [mAU*s] | 峰高 [mAU]   | 峰面积 %   |
|-----|------------|------|----------|-------------|------------|---------|
| 1   | 9.093      | MF R | 0.1466   | 523.78491   | 59.52987   | 4.4171  |
| 2   | 9.503      | FM R | 0.1705   | 1.13345e4   | 1107.66833 | 95.5829 |

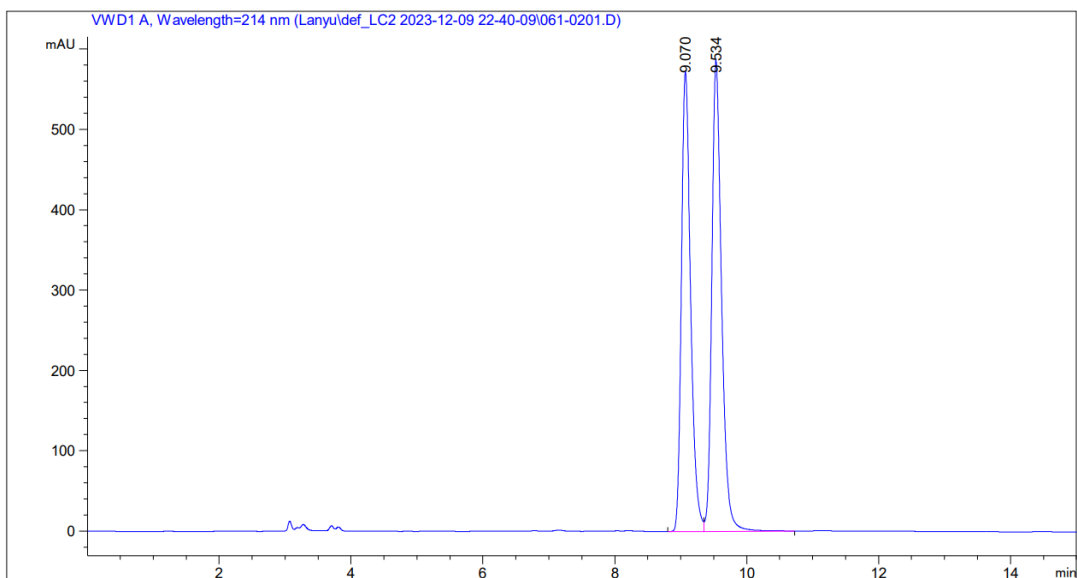

| 峰 # | 保留时间 [min] | 类型 | 峰宽 [min] | 峰面积 [mAU*s] | 峰高 [mAU]  | 峰面积 %   |
|-----|------------|----|----------|-------------|-----------|---------|
| 1   | 9.070      | BV | 0.1479   | 5541.40479  | 572.40955 | 47.8353 |
| 2   | 9.534      | VB | 0.1572   | 6042.94727  | 586.63373 | 52.1647 |

**(R)-3-(2-chlorobenzyl)-5-methylene-4-phenyloxazolidin-2-one (3a)**

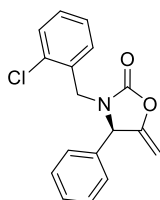

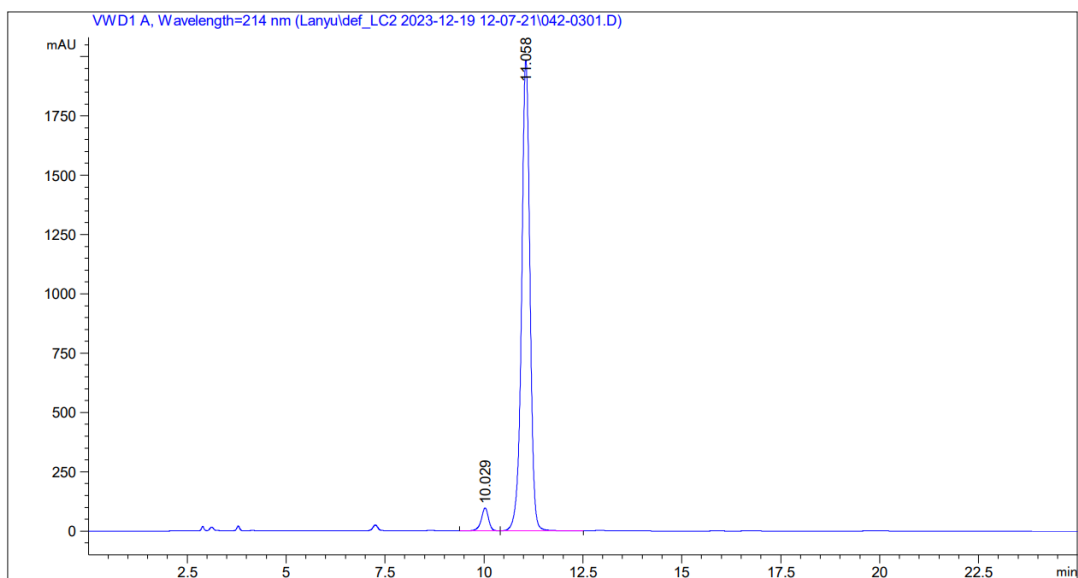

| 峰 # | 保留时间 [min] | 类型 | 峰宽 [min] | 峰面积 [mAU*s] | 峰高 [mAU]   | 峰面积 %   |
|-----|------------|----|----------|-------------|------------|---------|
| 1   | 10.029     | BV | 0.1948   | 1256.00537  | 97.18166   | 4.1132  |
| 2   | 11.058     | VB | 0.2263   | 2.92801e4   | 1982.40100 | 95.8868 |

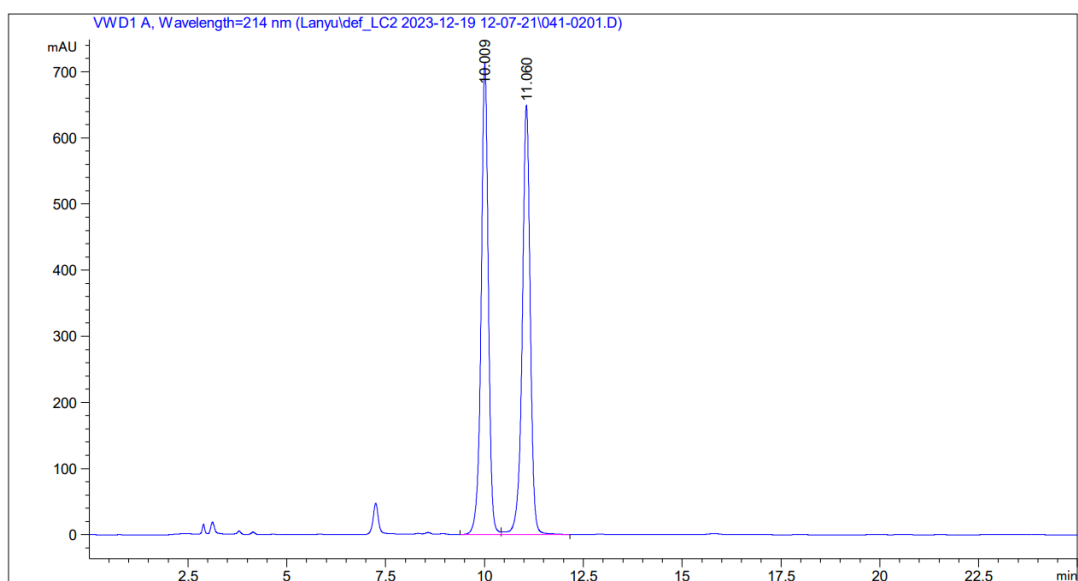

| 峰 # | 保留时间 [min] | 类型 | 峰宽 [min] | 峰面积 [mAU*s] | 峰高 [mAU]  | 峰面积 %   |
|-----|------------|----|----------|-------------|-----------|---------|
| 1   | 10.009     | BV | 0.1914   | 9008.46582  | 713.01178 | 49.7543 |
| 2   | 11.060     | VB | 0.2126   | 9097.45020  | 648.87683 | 50.2457 |

**(R)-3-(4-bromo-2-fluorobenzyl)-5-methylene-4-phenyloxazolidin-2-one (3am)**

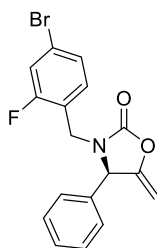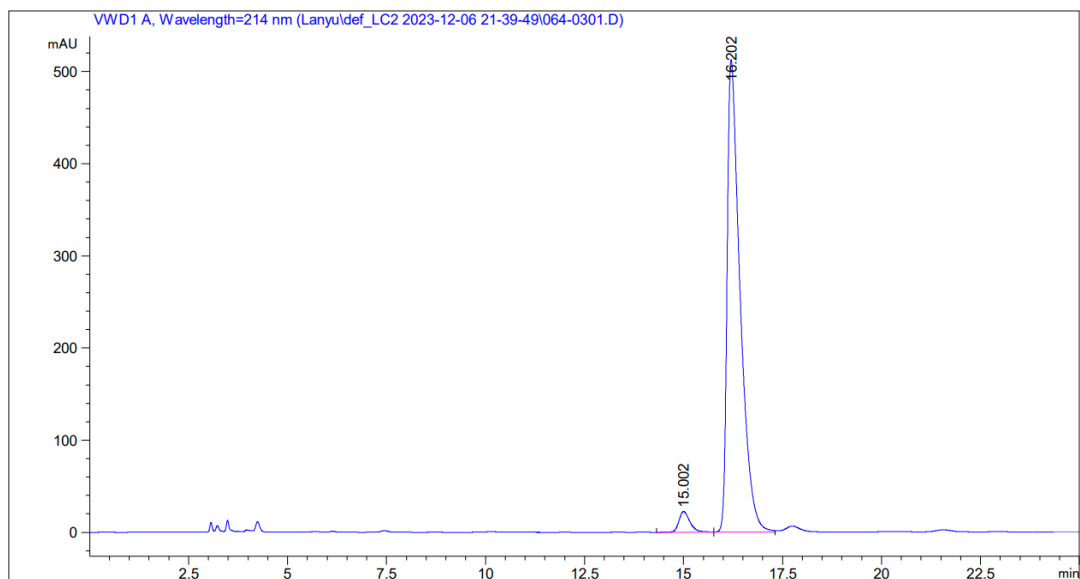

| 峰 # | 保留时间 [min] | 类型   | 峰宽 [min] | 峰面积 [mAU*s] | 峰高 [mAU]  | 峰面积 %   |
|-----|------------|------|----------|-------------|-----------|---------|
| 1   | 15.002     | BB   | 0.2913   | 431.31815   | 22.42954  | 3.5692  |
| 2   | 16.202     | MF R | 0.3790   | 1.16530e4   | 512.39392 | 96.4308 |

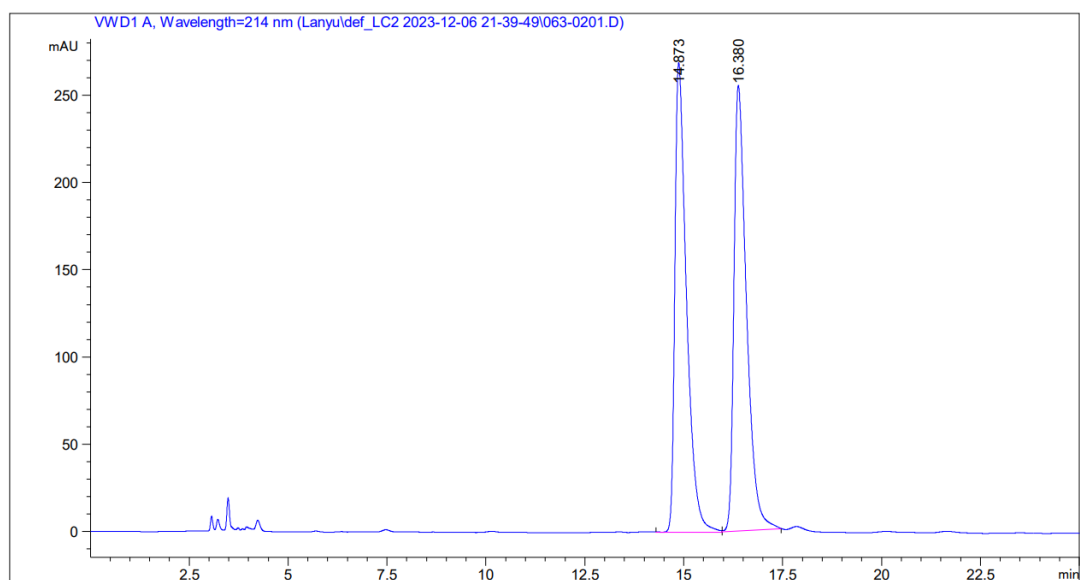

| 峰 # | 保留时间 [min] | 类型   | 峰宽 [min] | 峰面积 [mAU*s] | 峰高 [mAU]  | 峰面积 %   |
|-----|------------|------|----------|-------------|-----------|---------|
| 1   | 14.873     | FM R | 0.3408   | 5507.58838  | 269.34344 | 49.4815 |
| 2   | 16.380     | MM R | 0.3554   | 5623.01563  | 255.21466 | 50.5185 |

**(R)-5-methylene-4-phenyl-3-(2,4,6-trimethylbenzyl)oxazolidin-2-one (3an)**

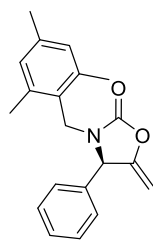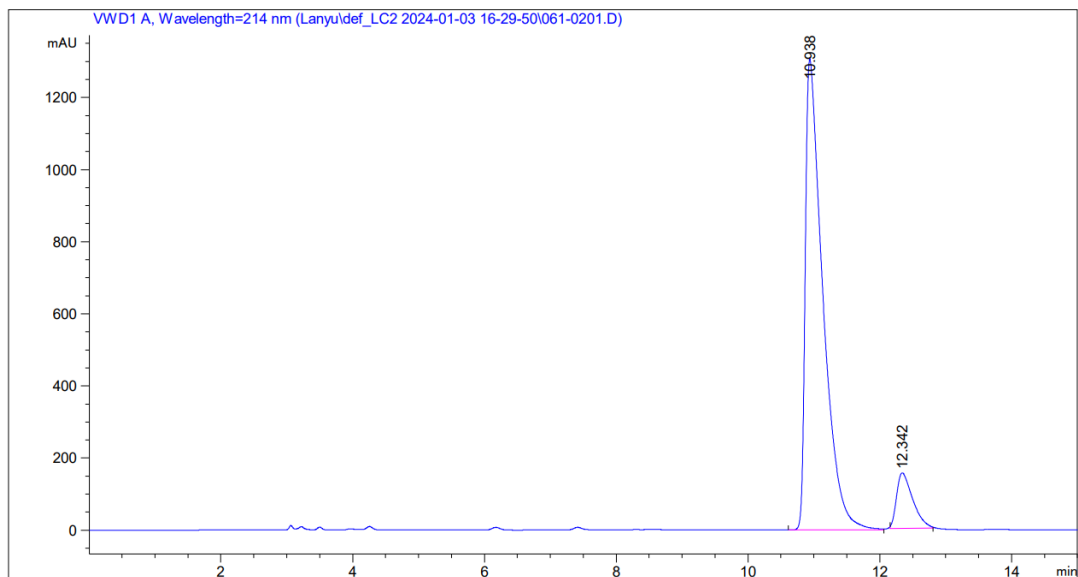

| 峰 # | 保留时间 [min] | 类型   | 峰宽 [min] | 峰面积 [mAU*s] | 峰高 [mAU]   | 峰面积 %   |
|-----|------------|------|----------|-------------|------------|---------|
| 1   | 10.938     | BV   | 0.2696   | 2.41694e4   | 1307.65393 | 90.3091 |
| 2   | 12.342     | MM R | 0.2812   | 2593.57422  | 153.69717  | 9.6909  |

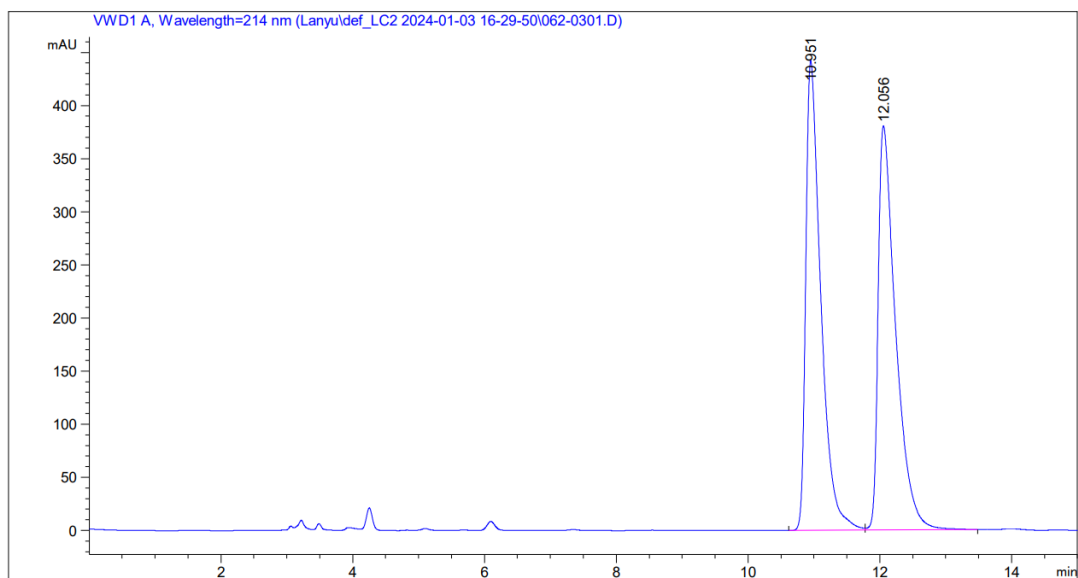

| 峰 # | 保留时间 [min] | 类型 | 峰宽 [min] | 峰面积 [mAU*s] | 峰高 [mAU]  | 峰面积 %   |
|-----|------------|----|----------|-------------|-----------|---------|
| 1   | 10.951     | BV | 0.2360   | 7019.07422  | 442.56430 | 49.9387 |
| 2   | 12.056     | VB | 0.2707   | 7036.29492  | 380.57446 | 50.0613 |

**(R)-3-(2,4-dimethoxybenzyl)-5-methylene-4-phenyloxazolidin-2-one (3ao)**

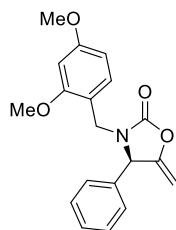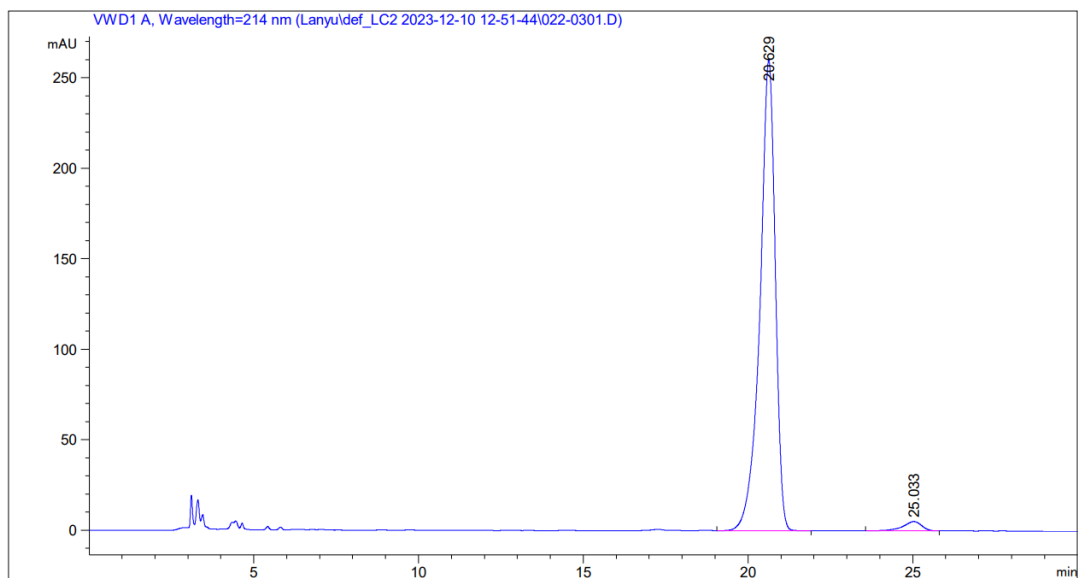

| 峰 # | 保留时间 [min] | 类型 | 峰宽 [min] | 峰面积 [mAU*s] | 峰高 [mAU]  | 峰面积 %   |
|-----|------------|----|----------|-------------|-----------|---------|
| 1   | 20.629     | BB | 0.4823   | 8414.57227  | 260.16025 | 97.5748 |
| 2   | 25.033     | BB | 0.5941   | 209.13828   | 5.19030   | 2.4252  |

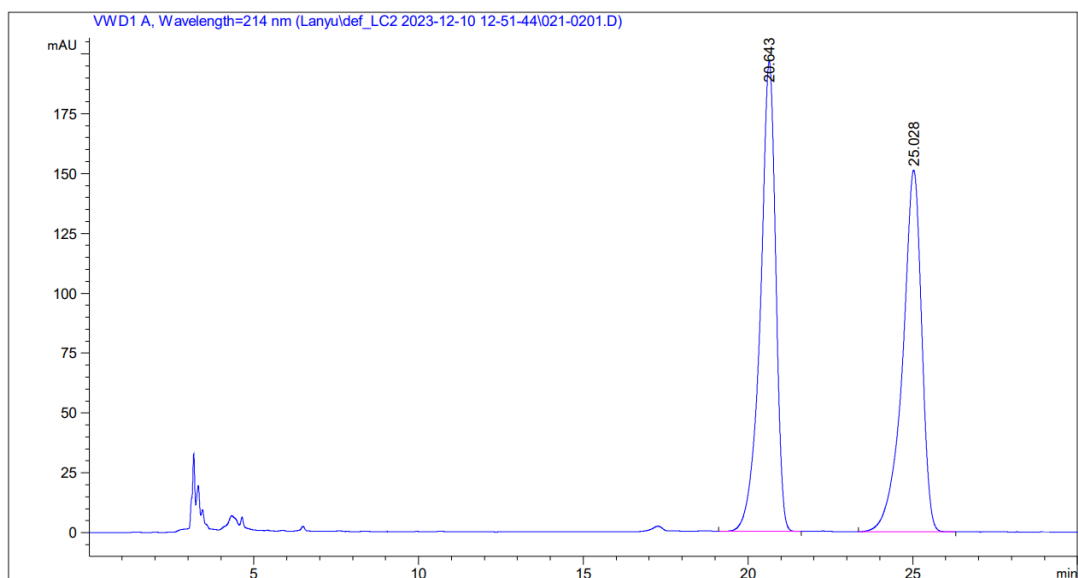

| 峰 # | 保留时间 [min] | 类型 | 峰宽 [min] | 峰面积 [mAU*s] | 峰高 [mAU]  | 峰面积 %   |
|-----|------------|----|----------|-------------|-----------|---------|
| 1   | 20.643     | BB | 0.4845   | 6356.66455  | 196.44385 | 51.0715 |
| 2   | 25.028     | BB | 0.6012   | 6089.93799  | 151.09442 | 48.9285 |

**(R)-5-methylene-3-(naphthalen-1-ylmethyl)-4-phenyloxazolidin-2-one (3ap)**

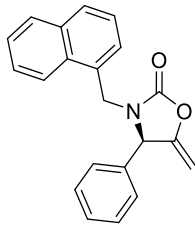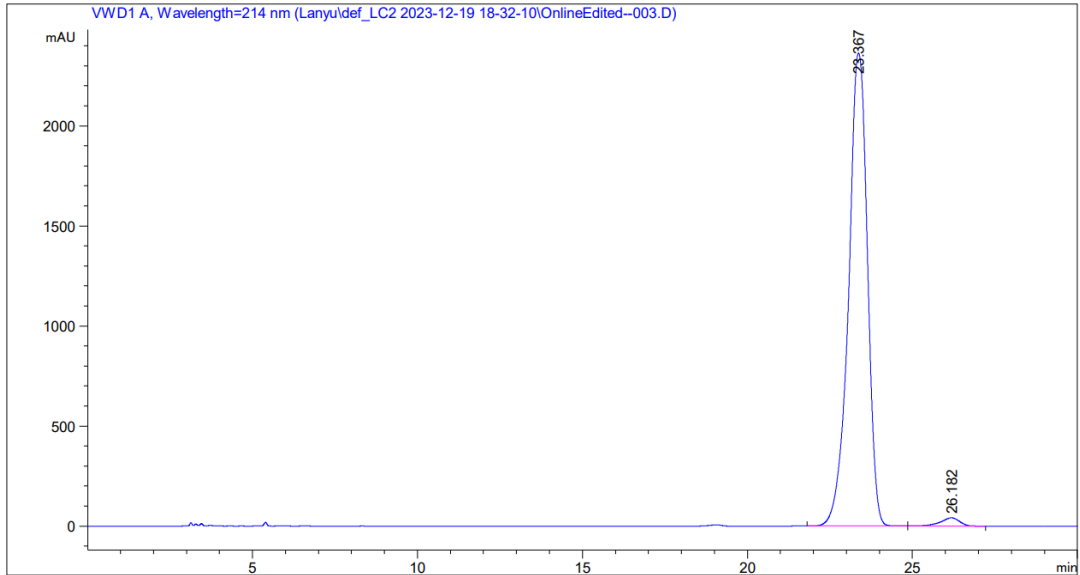

| 峰 # | 保留时间 [min] | 类型 | 峰宽 [min] | 峰面积 [mAU*s] | 峰高 [mAU]   | 峰面积 %   |
|-----|------------|----|----------|-------------|------------|---------|
| 1   | 23.367     | BB | 0.6016   | 9.35225e4   | 2363.52393 | 98.2566 |
| 2   | 26.182     | BB | 0.6035   | 1659.43628  | 41.14601   | 1.7434  |

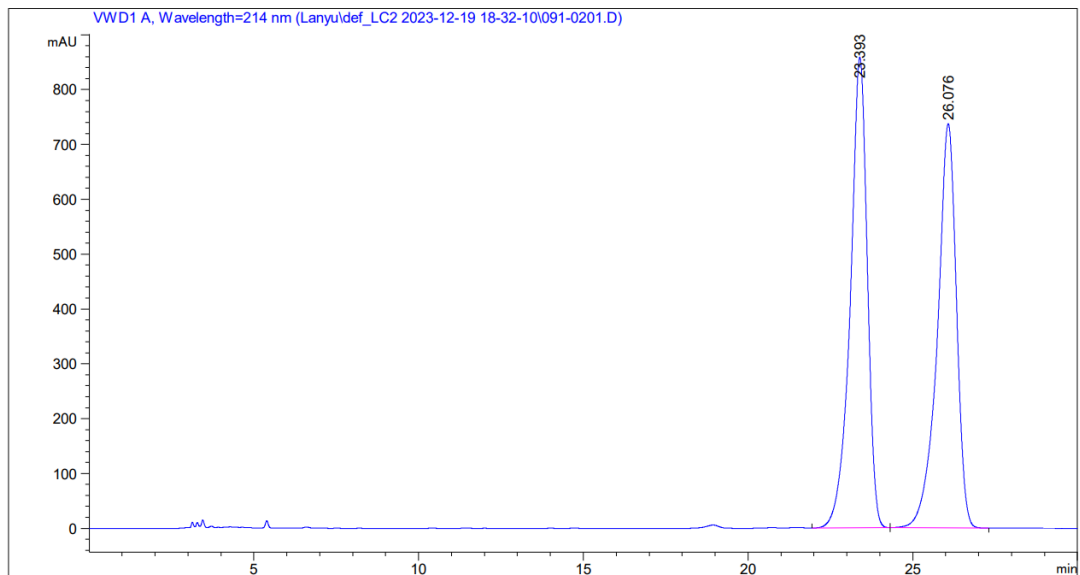

| 峰 # | 保留时间 [min] | 类型 | 峰宽 [min] | 峰面积 [mAU*s] | 峰高 [mAU]  | 峰面积 %   |
|-----|------------|----|----------|-------------|-----------|---------|
| 1   | 23.393     | BB | 0.5360   | 3.07341e4   | 857.83856 | 50.8795 |
| 2   | 26.076     | BB | 0.5986   | 2.96716e4   | 737.16888 | 49.1205 |

**(R)-5-methylene-3-(naphthalen-2-ylmethyl)-4-phenyloxazolidin-2-one (3aq)**



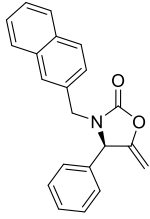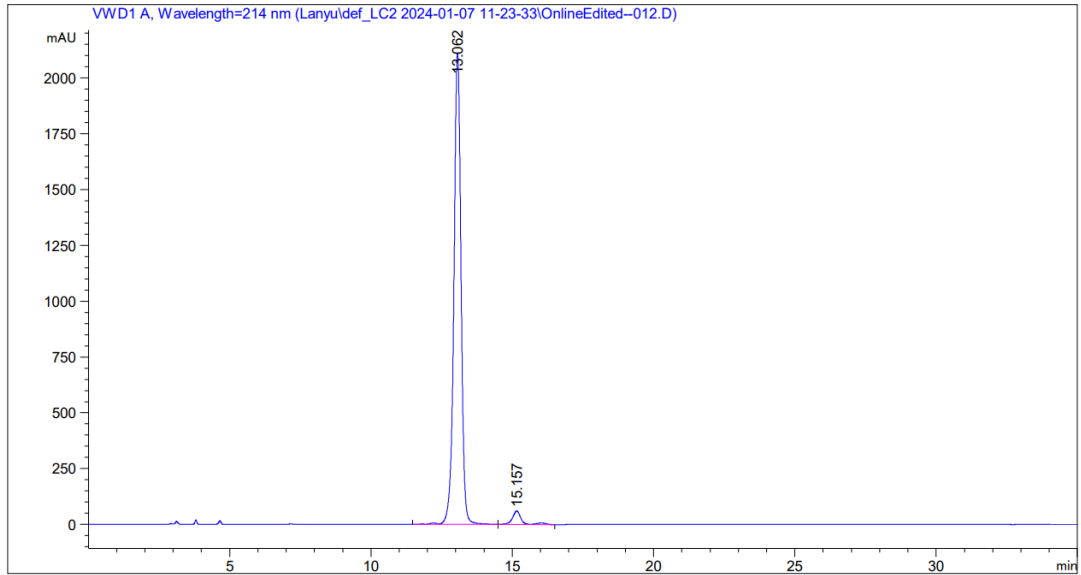

| 峰 # | 保留时间 [min] | 类型   | 峰宽 [min] | 峰面积 [mAU*s] | 峰高 [mAU]   | 峰面积 %   |
|-----|------------|------|----------|-------------|------------|---------|
| 1   | 13.062     | VB R | 0.2684   | 3.70858e4   | 2109.12183 | 96.5330 |
| 2   | 15.157     | BV R | 0.2942   | 1331.94995  | 59.70985   | 3.4670  |

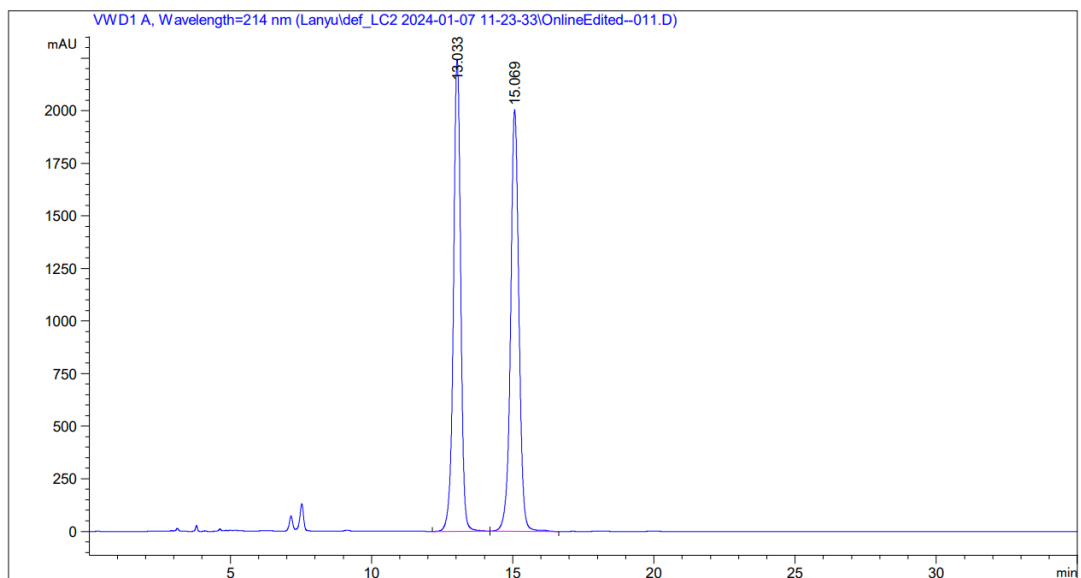

| 峰 # | 保留时间 [min] | 类型   | 峰宽 [min] | 峰面积 [mAU*s] | 峰高 [mAU]   | 峰面积 %   |
|-----|------------|------|----------|-------------|------------|---------|
| 1   | 13.033     | BB   | 0.2745   | 4.00639e4   | 2242.06665 | 49.3507 |
| 2   | 15.069     | BV R | 0.3130   | 4.11181e4   | 2004.08582 | 50.6493 |

**(R)-5-methylene-4-phenyl-3-(3-phenylpropyl)oxazolidin-2-one (3ar)**

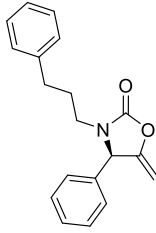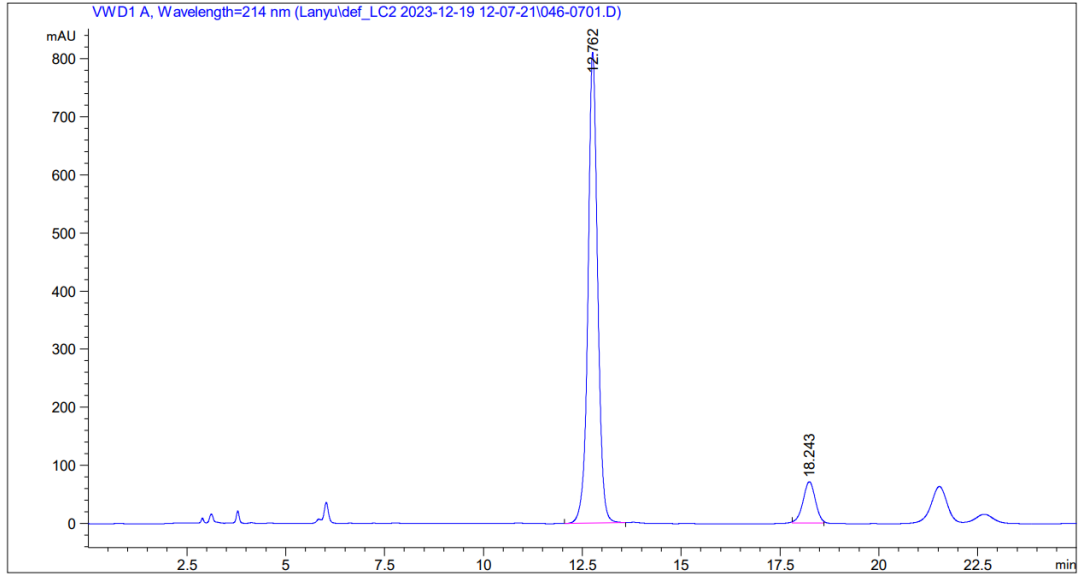

| 峰 # | 保留时间 [min] | 类型   | 峰宽 [min] | 峰面积 [mAU*s] | 峰高 [mAU]  | 峰面积 %   |
|-----|------------|------|----------|-------------|-----------|---------|
| 1   | 12.762     | BB   | 0.2550   | 1.36858e4   | 810.35327 | 89.9792 |
| 2   | 18.243     | MM R | 0.3580   | 1524.16443  | 70.95282  | 10.0208 |

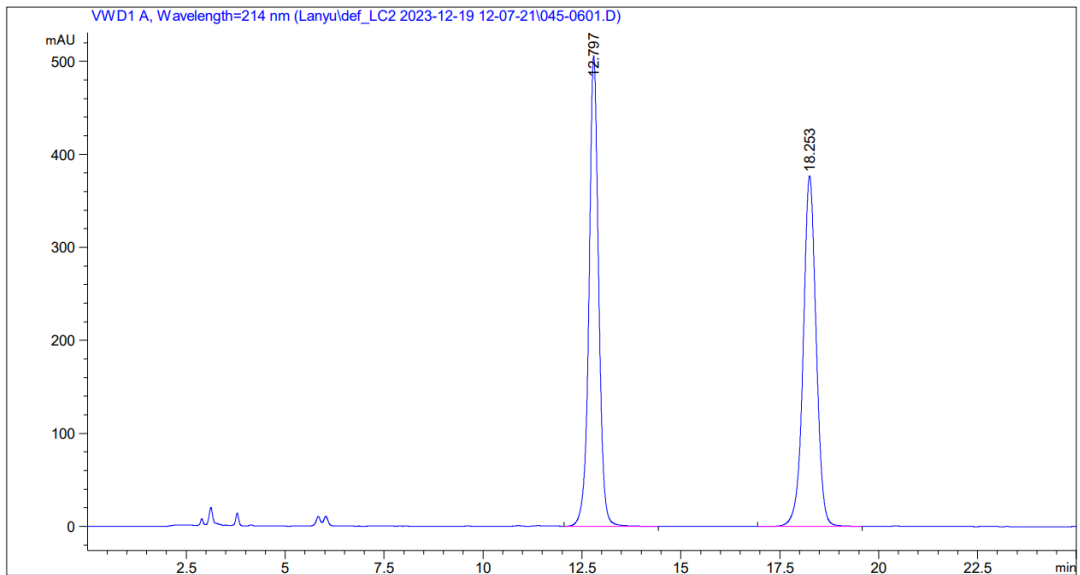

| 峰 # | 保留时间 [min] | 类型 | 峰宽 [min] | 峰面积 [mAU*s] | 峰高 [mAU]  | 峰面积 %   |
|-----|------------|----|----------|-------------|-----------|---------|
| 1   | 12.797     | BB | 0.2560   | 8584.11621  | 505.71268 | 49.9281 |
| 2   | 18.253     | BB | 0.3484   | 8608.83105  | 377.06201 | 50.0719 |

**(R)-3-(benzylamino)-3-phenylpropan-1-ol (4aa)**

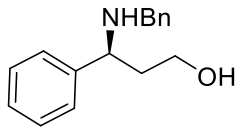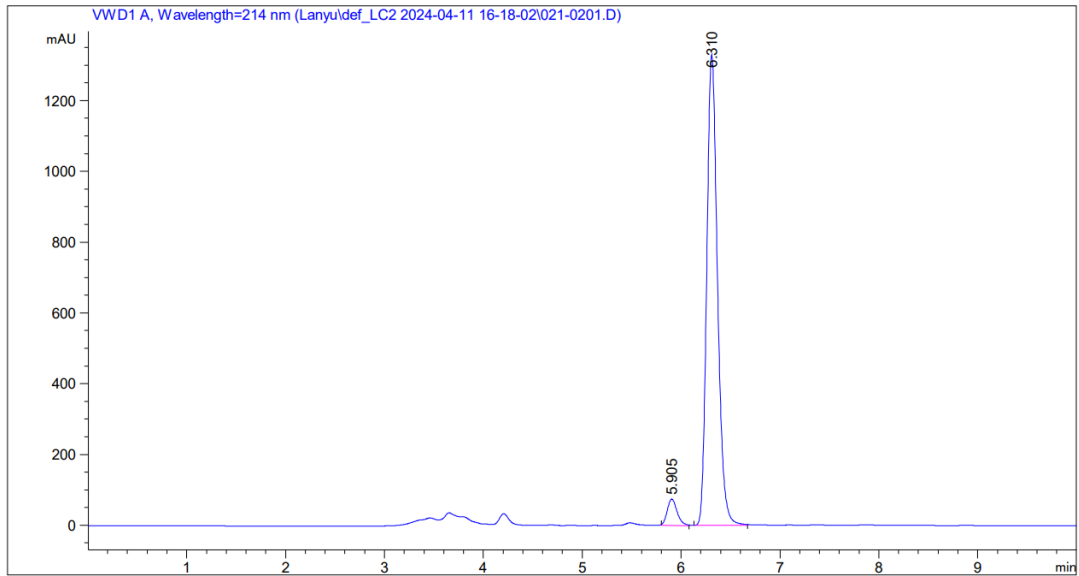

| 峰 # | 保留时间 [min] | 类型   | 峰宽 [min] | 峰面积 [mAU*s] | 峰高 [mAU]   | 峰面积 %   |
|-----|------------|------|----------|-------------|------------|---------|
| 1   | 5.905      | MM R | 0.1158   | 516.09229   | 74.25692   | 4.9059  |
| 2   | 6.310      | MF R | 0.1254   | 1.00037e4   | 1330.09644 | 95.0941 |

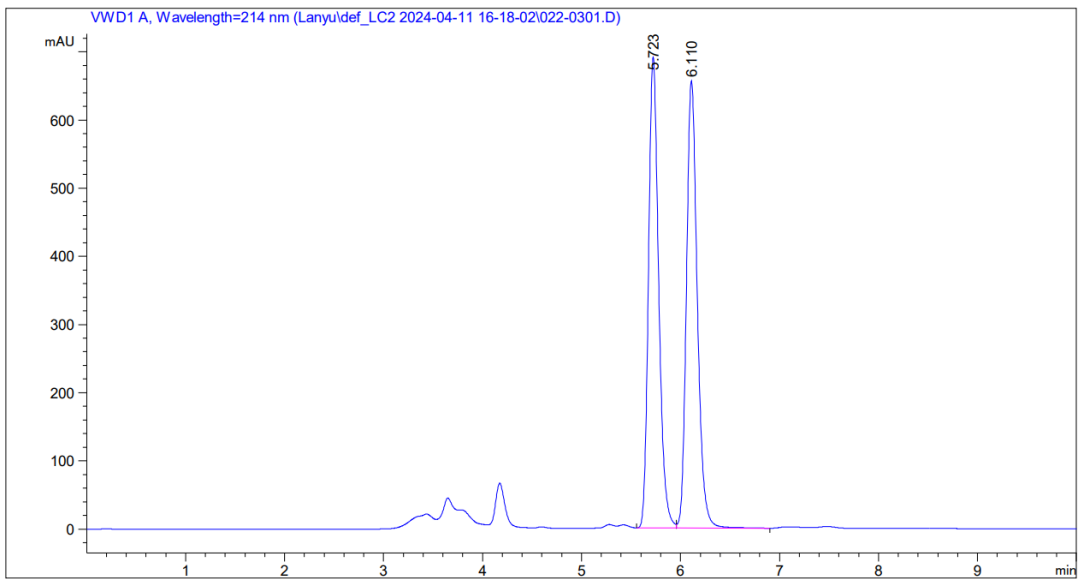

| 峰 # | 保留时间 [min] | 类型 | 峰宽 [min] | 峰面积 [mAU*s] | 峰高 [mAU]  | 峰面积 %   |
|-----|------------|----|----------|-------------|-----------|---------|
| 1   | 5.723      | BV | 0.1093   | 4931.73633  | 690.43823 | 49.6928 |
| 2   | 6.110      | VB | 0.1168   | 4992.70996  | 656.02411 | 50.3072 |

**(4R,5R)-3-benzyl-5-methyl-4-phenyloxazolidin-2-one (4ab)**

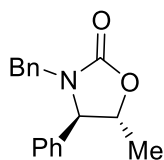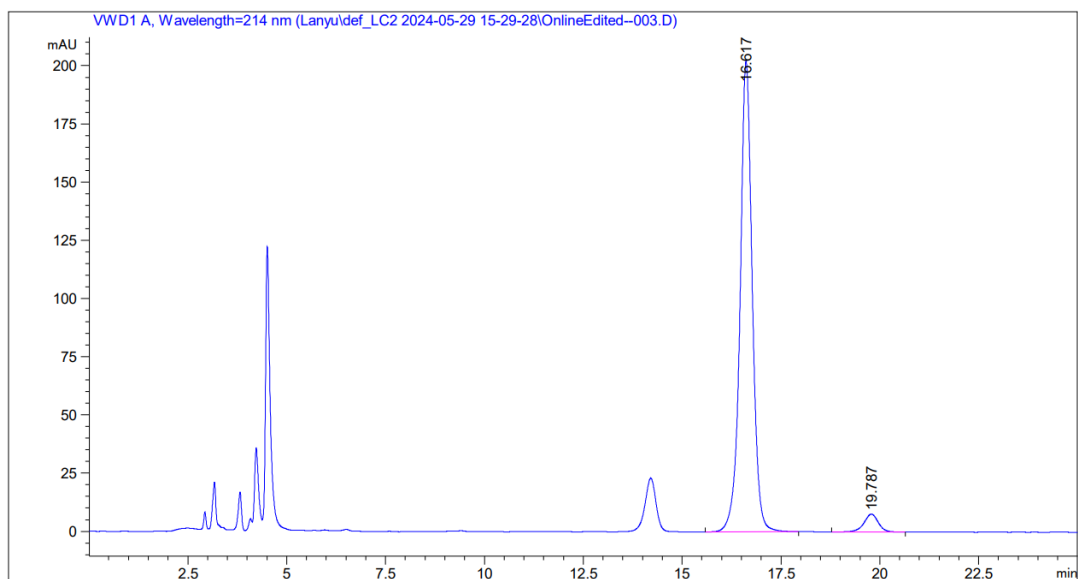

| 峰 # | 保留时间 [min] | 类型 | 峰宽 [min] | 峰面积 [mAU*s] | 峰高 [mAU]  | 峰面积 %   |
|-----|------------|----|----------|-------------|-----------|---------|
| 1   | 16.617     | BB | 0.3220   | 4337.18311  | 202.37708 | 95.5812 |
| 2   | 19.787     | BB | 0.3882   | 200.50938   | 7.74095   | 4.4188  |

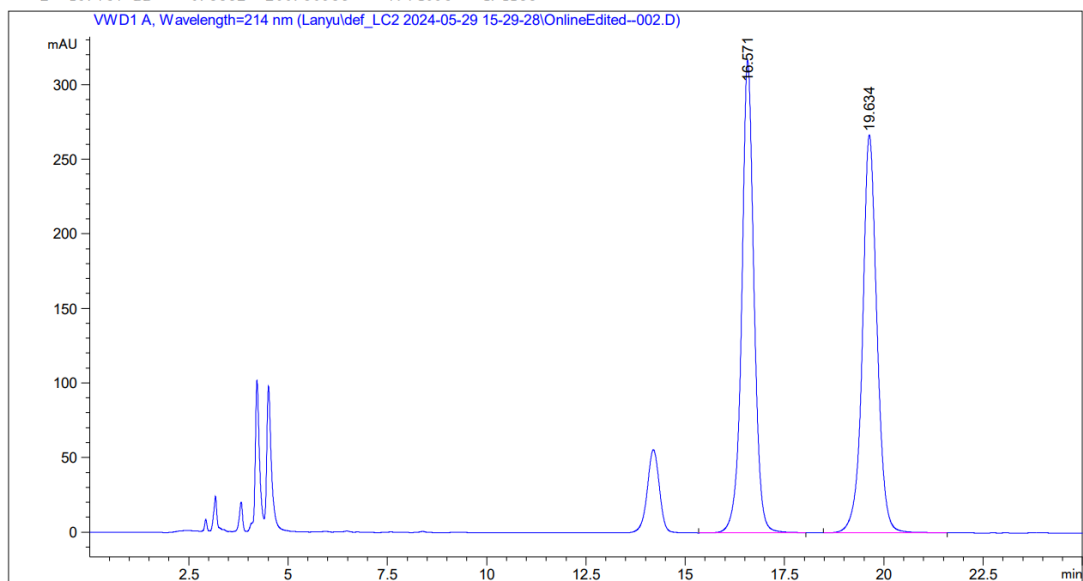

| 峰 # | 保留时间 [min] | 类型 | 峰宽 [min] | 峰面积 [mAU*s] | 峰高 [mAU]  | 峰面积 %   |
|-----|------------|----|----------|-------------|-----------|---------|
| 1   | 16.571     | BB | 0.3219   | 6788.20410  | 316.85809 | 49.9907 |
| 2   | 19.634     | BB | 0.3830   | 6790.72217  | 266.74265 | 50.0093 |
